# Comparative analyses of the prognosis, tumor immune microenvironment, and drug treatment response between left-sided and right-sided colon cancer by integrating scRNA-seq and bulk RNA-seq data

Lichao Cao<sup>1,2</sup>, Shenrui Zhang<sup>3</sup>, Danni Yao<sup>1,2</sup>, Ying Ba<sup>3</sup>, Qi Weng<sup>3</sup>, Jin Yang<sup>1,2</sup>, Hezi Zhang<sup>3</sup>, Yanan Ren<sup>1,2</sup>

<sup>1</sup>Provincial Key Laboratory of Biotechnology of Shaanxi Province, Northwest University, Xi'an, China

<sup>2</sup>Key Laboratory of Resource Biology and Biotechnology in Western China, Ministry of Education, School of Life Sciences, Northwest University, Xi'an, China

<sup>3</sup>Shenzhen Nucleus Gene Technology Co., Ltd., Shenzhen, China

**Correspondence to:** Jin Yang, Hezi Zhang; email: [yangjin@nwu.edu.cn](mailto:yangjin@nwu.edu.cn); [hezizhang2020@163.com](mailto:hezizhang2020@163.com), <https://orcid.org/0000-0003-4355-6802>

**Keywords:** colon cancer, scRNA-seq, prognosis, treatment, left-sided and right-sided

**Received:** February 8, 2023

**Accepted:** June 30, 2023

**Published:**

**Copyright:** © 2023 Cao et al. This is an open access article distributed under the terms of the [Creative Commons Attribution License](https://creativecommons.org/licenses/by/3.0/) (CC BY 3.0), which permits unrestricted use, distribution, and reproduction in any medium, provided the original author and source are credited.

## ABSTRACT

**Background:** In this study, we compared the prognosis, tumor immune microenvironment (TIM), and drug treatment response between left-sided (LCC) and right-sided (RCC) colon cancer to predict outcomes in patients with LCC and RCC.

**Methods:** Based on identified differentially expressed genes and using single-cell RNA sequencing data, we constructed and validated a prognostic model for LCC and RCC patients in the TCGA-COAD cohort and GSE103479 cohort. Moreover, we compared the differences of TIM characteristics and drug treatment response between LCC and RCC patients.

**Results:** We constructed and validated a five-gene prognostic model for LCC patients and a four-gene prognostic model for RCC patients, and both showed excellent performance. The RCC patients with higher risk scores were significantly associated with greater metastasis ( $P = 2.6 \times 10^{-5}$ ), N stage ( $P = 0.012$ ), advanced pathological stage ( $P = 1.4 \times 10^{-4}$ ), and more stable microsatellite status ( $P = 0.007$ ) but not T stage ( $P = 0.200$ ). For LCC patients, the risk scores were not significantly associated with tumor stage and microsatellite status ( $P > 0.05$ ). Additionally, immune infiltration by CD8 and regulatory T cells and M0, M1, and M2 macrophages differed significantly between LCC and RCC patients ( $P < 0.05$ ). *APC* and *TP53* mutations were significantly more common in LCC patients ( $P < 0.05$ ). In contrast, *KRAS*, *SYNE1*, and *MUC16* mutations were significantly more common in RCC patients ( $P < 0.05$ ). In addition, tumor mutation burden values were significantly higher in RCC patients than in LCC patients ( $P = 5.9 \times 10^{-8}$ ). Moreover, the expression of immune checkpoint targets was significantly higher in RCC patients than in LCC patients ( $P < 0.05$ ), indicating that RCC patients maybe more sensitive to immunotherapy. However, LCC and RCC patients did not differ significantly in their sensitivity to eight selected chemicals or target drugs ( $P > 0.05$ ). The average half-maximal inhibitory concentrations for camptothecin, teniposide, vinorelbine, and mitoxantrone were significantly lower in low-risk than in high-risk RCC patients ( $P < 0.05$ ), indicating that the lower risk score of RCC patients, the more sensitive they were to these four drugs.

**Conclusions:** We investigated the differences in prognosis, TIM, and drug treatment response between LCC and RCC patients, which may contribute to accurate colon cancer prognosis and treatment of colon cancer.

## INTRODUCTION

Colon cancer (CC) is a common gastrointestinal malignant tumor with high mortality worldwide [1]. Numerous studies have identified various prognostic signatures for CC [2–4] to facilitate CC prognosis and treatment. However, the tumor heterogeneity greatly complicates the treatment and prognosis of CC patients. A landmark study has divided CC into four consensus molecular subtypes (CMS) using aggregated gene expression data and facilitate the translation of molecular subtypes into the clinic [5]. Otherwise, CC can be subdivided into left-sided (LCC) and right-sided (RCC) based on the colon's anatomical structure [6]. However, the tumor microenvironment (TME), prognosis, and treatment of LCC and RCC patients are inconsistent [7–9]. Therefore, exploring the potential relationship between CMS subtypes and RCC-LCC subtypes and exploring the heterogeneity may be critical for improving precision treatment of CC.

Single-cell next-generation RNA sequencing (scRNA-seq) can be used to investigate gene expression profiles at the single-cell level, facilitating the dissection of previously hidden heterogeneity in cell populations [10]. Therefore, exploring crucial genes based on scRNA-seq data could provide more meaningful prognostic signatures and drug treatment for CC. A recent study identified ferroptosis-related subtypes, investigated LCC and RCC heterogeneity, and established a scoring model to quantify tumor immune microenvironment (TIM) characteristics [11]. However, few studies have explored TME, prognosis, and treatment differences between LCC and RCC patients using scRNA-seq data.

By combining scRNA-seq data and bulk RNA-seq data, our study established and verified the prognostic models for LCC and RCC patients, and compared their differences of prognosis, microenvironment and drug treatment response. Our findings may facilitate more accurate predictions of the prognosis and potential treatment benefits for CC patients.

## MATERIALS AND METHODS

### Data download

The scRNA-seq dataset GSE200997, comprising 7 normal and 15 tumor samples, was downloaded from the US National Center for Biotechnology Information's Gene Expression Omnibus (GEO) database (<https://www.ncbi.nlm.nih.gov/geo/>). The original data included 23,828 genes and 49,859 cells, of which 18,273 cells were from normal samples, and 31,586 were from tumor samples. And the cells from

tumor samples were used for further analysis, of which 16,448 cells were LCC cells and 15,138 were RCC cells.

And another scRNA-seq dataset, GSE144735, was also downloaded from GEO database for verification. The dataset included 27,414 cells from 6 patients in the core and border regions, as well as in matched normal mucosa. Based on a previously reported study [7], the cecum, ascending, and hepatic belong to the right side, and the splenic, descending, sigmoid, rectum, and junction belong to the left side. Finally, 5,780 LCC cells and 2,474 RCC cells from the core region of tumor samples were selected for subsequent validation analysis.

The Cancer Genome Atlas Colon Adenocarcinoma (TCGA-COAD) bulk RNA-seq data were downloaded from the University of California-Santa Cruz Xena platform (<https://xenabrowser.net/datapages/>). Only samples with survival and location information were included. Similarly, based on the published literature [7], we selected 394 samples, including 149 LCC samples, 224 RCC samples, and 21 transverse sectional samples. Their detailed information is provided in Table 1. Furthermore, we also downloaded their corresponding somatic mutation profiling data.

The independent dataset GSE103479 was downloaded from GEO database (<https://www.ncbi.nlm.nih.gov/geo/>), which included 77 LCC and 59 RCC samples, detailed information could be seen in Supplementary Table 1.

### Identification of the location-related differentially expressed genes (DEGs) based on the dataset GSE200997

The various functions in *Seurat* package (version=4.1.1) for the R statistical software (v.4.0.2; <http://www.R-project.org>) was used to analyze the scRNA-seq data [12–14]. Genes expressed in <3 cells and cells expressing <50 genes or >6,000 genes were excluded. In addition, the mitochondrial content was <20%.

The filtered data were normalized using the *NormalizeData* function, and the first 3000 highly variable genes were screened using the *FindVariableFeatures* function. Next, the features were scaled using the *ScaleData* function, and their dimensionality was reduced using the *RunPCA* function. Then, we set  $\text{dim} = 20$  and clustered the cells using the *FindNeighbors* and *FindClusters* functions. Importantly, we conducted the t-distributed stochastic neighbor embedding and uniform manifold approximation and projection (UMAP) algorithms to reduce dimensionality further and visualize the cluster classification based on

**Table 1. Detailed information of TCGA-COAD cohort.**

|                              | Left<br>(N=149) | Right<br>(N=224) | Transverse<br>(N=21) | Overall<br>(N=394) |
|------------------------------|-----------------|------------------|----------------------|--------------------|
| <b>Gender</b>                |                 |                  |                      |                    |
| female                       | 79 (53.0%)      | 102 (45.5%)      | 13 (61.9%)           | 194 (49.2%)        |
| male                         | 70 (47.0%)      | 122 (54.5%)      | 8 (38.1%)            | 200 (50.8%)        |
| <b>Age</b>                   |                 |                  |                      |                    |
| <=60                         | 51 (34.2%)      | 55 (24.6%)       | 12 (57.1%)           | 118 (29.9%)        |
| >60                          | 98 (65.8%)      | 169 (75.4%)      | 9 (42.9%)            | 276 (70.1%)        |
| <b>Microsatellite status</b> |                 |                  |                      |                    |
| N/A                          | 4 (2.7%)        | 7 (3.1%)         | 0 (0%)               | 11 (2.8%)          |
| Indeterminate                | 3 (2.0%)        | 0 (0%)           | 0 (0%)               | 3 (0.8%)           |
| MSI-H                        | 7 (4.7%)        | 65 (29.0%)       | 4 (19.0%)            | 76 (19.3%)         |
| MSI-L                        | 26 (17.4%)      | 34 (15.2%)       | 4 (19.0%)            | 64 (16.2%)         |
| MSS                          | 109 (73.2%)     | 118 (52.7%)      | 13 (61.9%)           | 240 (60.9%)        |
| <b>AJCC-Stage</b>            |                 |                  |                      |                    |
| i                            | 23 (15.4%)      | 39 (17.4%)       | 1 (4.8%)             | 63 (16.0%)         |
| ii                           | 49 (32.9%)      | 92 (41.1%)       | 8 (38.1%)            | 149 (37.8%)        |
| iii                          | 49 (32.9%)      | 60 (26.8%)       | 9 (42.9%)            | 118 (29.9%)        |
| iv                           | 25 (16.8%)      | 27 (12.1%)       | 1 (4.8%)             | 53 (13.5%)         |
| Missing                      | 3 (2.0%)        | 6 (2.7%)         | 2 (9.5%)             | 11 (2.8%)          |
| <b>AJCC-T</b>                |                 |                  |                      |                    |
| T1                           | 5 (3.4%)        | 4 (1.8%)         | 1 (4.8%)             | 10 (2.5%)          |
| T2                           | 26 (17.4%)      | 38 (17.0%)       | 0 (0%)               | 64 (16.2%)         |
| T3                           | 108 (72.5%)     | 156 (69.6%)      | 15 (71.4%)           | 279 (70.8%)        |
| T4                           | 10 (6.7%)       | 25 (11.2%)       | 5 (23.8%)            | 40 (10.2%)         |
| Missing                      | 0 (0%)          | 1 (0.4%)         | 0 (0%)               | 1 (0.3%)           |
| <b>AJCC-N</b>                |                 |                  |                      |                    |
| N0                           | 76 (51.0%)      | 139 (62.1%)      | 11 (52.4%)           | 226 (57.4%)        |
| N1                           | 48 (32.2%)      | 44 (19.6%)       | 7 (33.3%)            | 99 (25.1%)         |
| N2                           | 25 (16.8%)      | 41 (18.3%)       | 3 (14.3%)            | 69 (17.5%)         |
| <b>AJCC-M</b>                |                 |                  |                      |                    |
| M0                           | 103 (69.1%)     | 163 (72.8%)      | 17 (81.0%)           | 283 (71.8%)        |
| M1                           | 25 (16.8%)      | 27 (12.1%)       | 1 (4.8%)             | 53 (13.5%)         |
| MX                           | 19 (12.8%)      | 28 (12.5%)       | 3 (14.3%)            | 50 (12.7%)         |
| Missing                      | 2 (1.3%)        | 6 (2.7%)         | 0 (0%)               | 8 (2.0%)           |

Abbreviation: AJCC, American Joint Committee on Cancer.

the selected top 20 principal components. In addition, the cell types of clusters were annotated using R's *SingleR* package, with *HumanPrimaryCellAtlasData* as the reference [15]. Moreover, we identified DEGs between LCC and RCC cells in each cell type using the *FindMarkers* function with  $\log_{fc}.\text{threshold} = 0.585$ . Finally, we identified location-related DEGs for CC by merging the DEGs identified in all annotated cell types. Additionally, location-related DEGs were subjected to gene ontology (GO) functional and Kyoto Encyclopedia

of Genes and Genomes (KEGG) enrichment analyses using R's *clusterProfiler* package [16].

### Prognostic LCC and RCC signature identification and validation

The tumor samples containing expression data and survival information in the TCGA-COAD cohort were used to establish the prognostic model. Finally, 123 LCC samples and 185 RCC samples were included.

Kaplan–Meier survival and univariate Cox regression analyses were performed on the location-related DEGs in the LCC and RCC expression profile data with a cutoff criterion of  $P < 0.05$ . The genes with maximum prognostic value were selected for least absolute shrinkage and selection operator (LASSO) regression analysis. Next, we established separate risk score models predicting LCC and RCC patient prognosis using a multivariate Cox regression analysis. Then, each patient’s risk score was calculated according to the following formula:

$$\begin{aligned} & \text{risk score} \\ &= \sum_i^n \text{coefficient of } \chi_i \\ & \times \text{scaled expression value of } \chi_i \end{aligned}$$

where “ $\chi_i$ ” represents the current signature, “ $j$ ” represents the location of the current signature, and “ $n$ ” represents the number of the whole signatures. Moreover, the prognostic signatures for LCC and RCC patients were validated using an independent cohort GSE103479.

Additionally, we investigated the expression of these prognostic genes in different LCC and RCC cell types of scRNA-seq datasets (GSE200997 and GSE14473), and compared the expression differences in LCC and RCC samples of bulk RNA-seq datasets (TCGA-COAD cohort and GSE103479).

### The CMS analysis

We predicted the CMS group of each tumor sample of TCGA-COAD cohort using R’s *CMScaller* package [17], the samples with an  $FDR > 0.05$  were filtered out. Then, we calculated the proportion of LCC and RCC samples in each CMS group, and compared the relationship between each CMS group and OS. Moreover, the expression differences of the prognostic markers among CMS groups were compared using *Kruskal–Wallis* test.

### Statistical analysis

We compared the overall survival (OS) status between LCC and RCC patients in the TCGA-COAD cohort and GSE103479 cohort by using the *Kruskal–Wallis* test. Additionally, receiver operating characteristic (ROC) and Kaplan–Meier curves were plotted to assess the predictive capabilities of the established risk score prognostic models. The most significant difference between true and false positive points on the ROC curve was selected as the best critical value for grouping patients. Moreover, we evaluated the performance of prognostic models in predicting tumor staging and

microsatellite status for LCC and RCC patients. All results with  $P < 0.05$  were considered statistically significant.

### Exploring TIM characteristics in LCC and RCC patients

Consistent with the samples used in constructing LCC and RCC prognosis models, the CIBERSORT algorithm was used to estimate the proportion of 22 tumor infiltrating immune cell types in each sample based on expression profiling dataset [18]. Differences in the immune landscape between the LCC and RCC patients were assessed using an unpaired *t*-test. The *cor.test* function in R was used to assess the correlations between the estimated proportions of immune cell types and the risk score of each sample in LCC and RCC patients. Moreover, we compared the mRNA levels of immune checkpoint proteins and their ligands between LCC and RCC patients and high-risk and low-risk patients.

Additionally, tumor samples containing somatic mutation data and survival information in the TCGA-COAD cohort were used to explore the mutation characteristics of LCC and RCC samples. Finally, 102 LCC samples and 166 RCC samples were included. First, we analyzed and visualized LCC and RCC patients’ somatic mutation profiles using the *maftools* R package [19]. Genes with significant mutation differences between LCC and RCC patients were assessed for their association with OS. Moreover, the fraction of affected oncogenic pathways was predicted using the *OncogenicPathways* function in the *maftools* R package. Next, we calculated the tumor mutation burden (TMB) value and visualized the LCC and RCC patient mutation profiling dataset. Then, TMB values and mutation profiles were compared between LCC and RCC patients. The optimal cutoff value of TMB was determined by the *surv\_cutpoint* algorithm of *survival* R package and then all samples were categorized into TMB-high group and TMB-low group. Subsequently, Kaplan–Meier curves were plotted to visualize the association between TMB values and OS in LCC and RCC patients. Finally, we calculated the median value of the sample’s TMB, and the samples with TMB values higher than this median value were classified as TMB-high group, while the samples with TMB values lower than this median value were classified as TMB-low group. Subsequently, the relationship between TMB and OS were further analyzed. All results with  $P < 0.05$  were considered statistically significant.

### Prediction and comparison of drug sensitivity in LCC and RCC patients

Consistent with the samples used in constructing LCC and RCC prognosis models, and based on the expression

profile dataset of these samples, we predicted the half-maximal inhibitory concentration ( $IC_{50}$ ) of cancer drugs in LCC and RCC patients using the *oncoPredict* R package [20] and selected drugs with an average  $IC_{50} < 5$  and related them to CC treatment. Next, we compared responses to these drugs in LCC and RCC patients and high-risk and low-risk LCC and RCC patients.

### Data availability statement

The TCGA-COAD cohort was available in the UCSC Xena (<https://xenabrowser.net/datapages/>). The scRNA-seq datasets GSE200997, GSE14473 and bulk RNA-seq data GSE103479 were download from NCBI-GEO database (<https://www.ncbi.nlm.nih.gov/geo/>).

## RESULTS

### Location-related DEGs identification in different cell types

Figure 1 highlights the whole analysis workflow. After filtering according to the selection criteria, there were 31,586 tumor cells in the scRNA-seq dataset (GSE200997), of which 16,448 were from LCC patients and 15,138 were from RCC patients. The quality control

data of scRNA-seq data, such as the range of RNA features, counts, and mitochondrial gene expression percentages for each cell, were shown in Figure 2A. The cluster tree with a resolution range of 0 to 1.6 showed that when  $RNA\_Snn\_$  was equal to 0.6, the number of branches was minimized, making it the optimal choice for dimensionality reduction (Figure 2B). Then, all cells were classified into 21 clusters using the UMAP algorithm and further automatically annotated into eight main cell types using the *singleR* R package (Figure 2C, 2D). LCC and RCC cell distributions in each annotated cell type were shown in Figure 2E. LCC and RCC DEGs statistics in each annotated cell type were provided in Table 2. More detailed DEGs information was provided in Supplementary Table 2. Finally, 690 location-related DEGs were obtained by merging the DEGs identified from each cell type. Functional and pathway enrichment analyses were performed on the location-related DEGs using the *clusterProfiler* R package. KEGG analysis indicated that the location-related DEGs were significantly enriched for terms associated with the interleukin-17 and tumor necrosis factor signaling pathways and apoptosis (Figure 2F). GO analysis indicated they had functions related to cytoplasmic translation, positive cell activation regulation, and cell-cell adhesion regulation (Figure 2G).

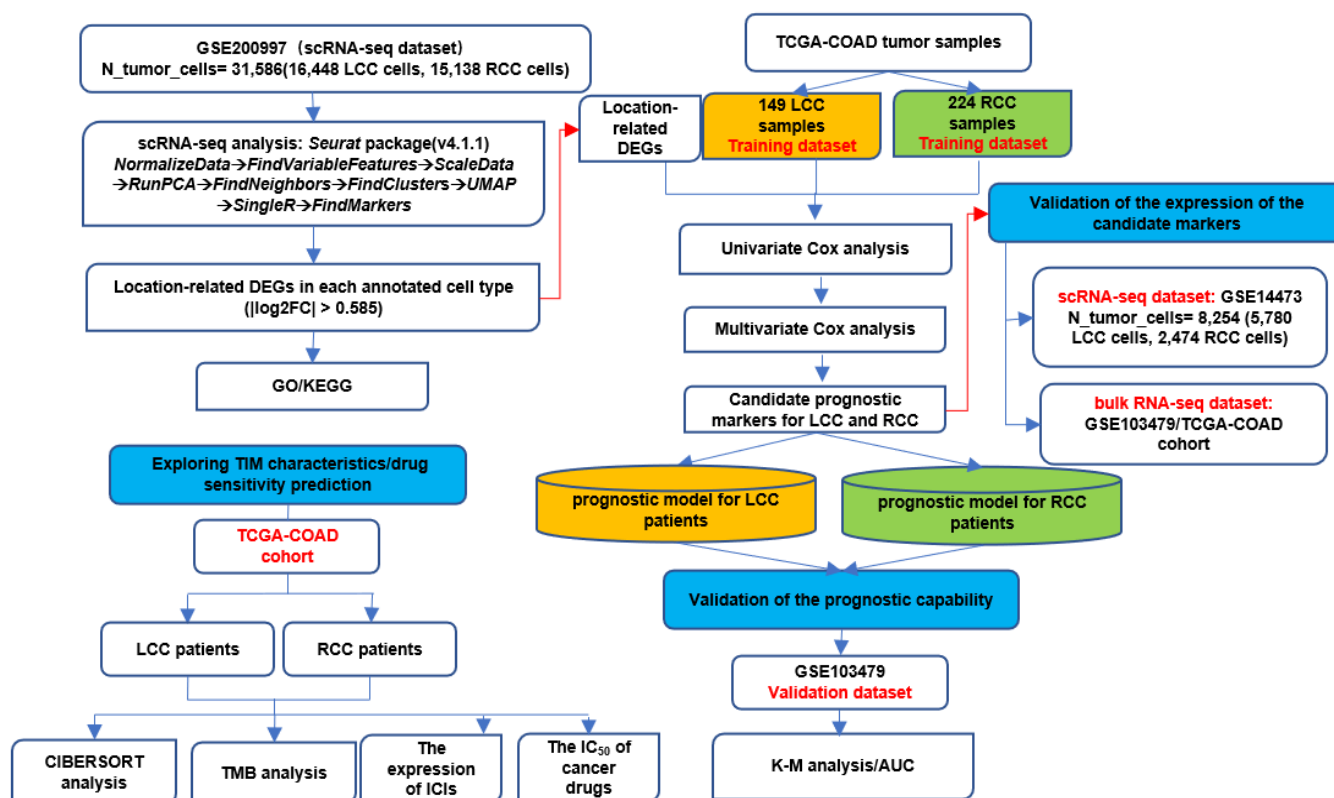

Figure 1. The whole analysis workflow.



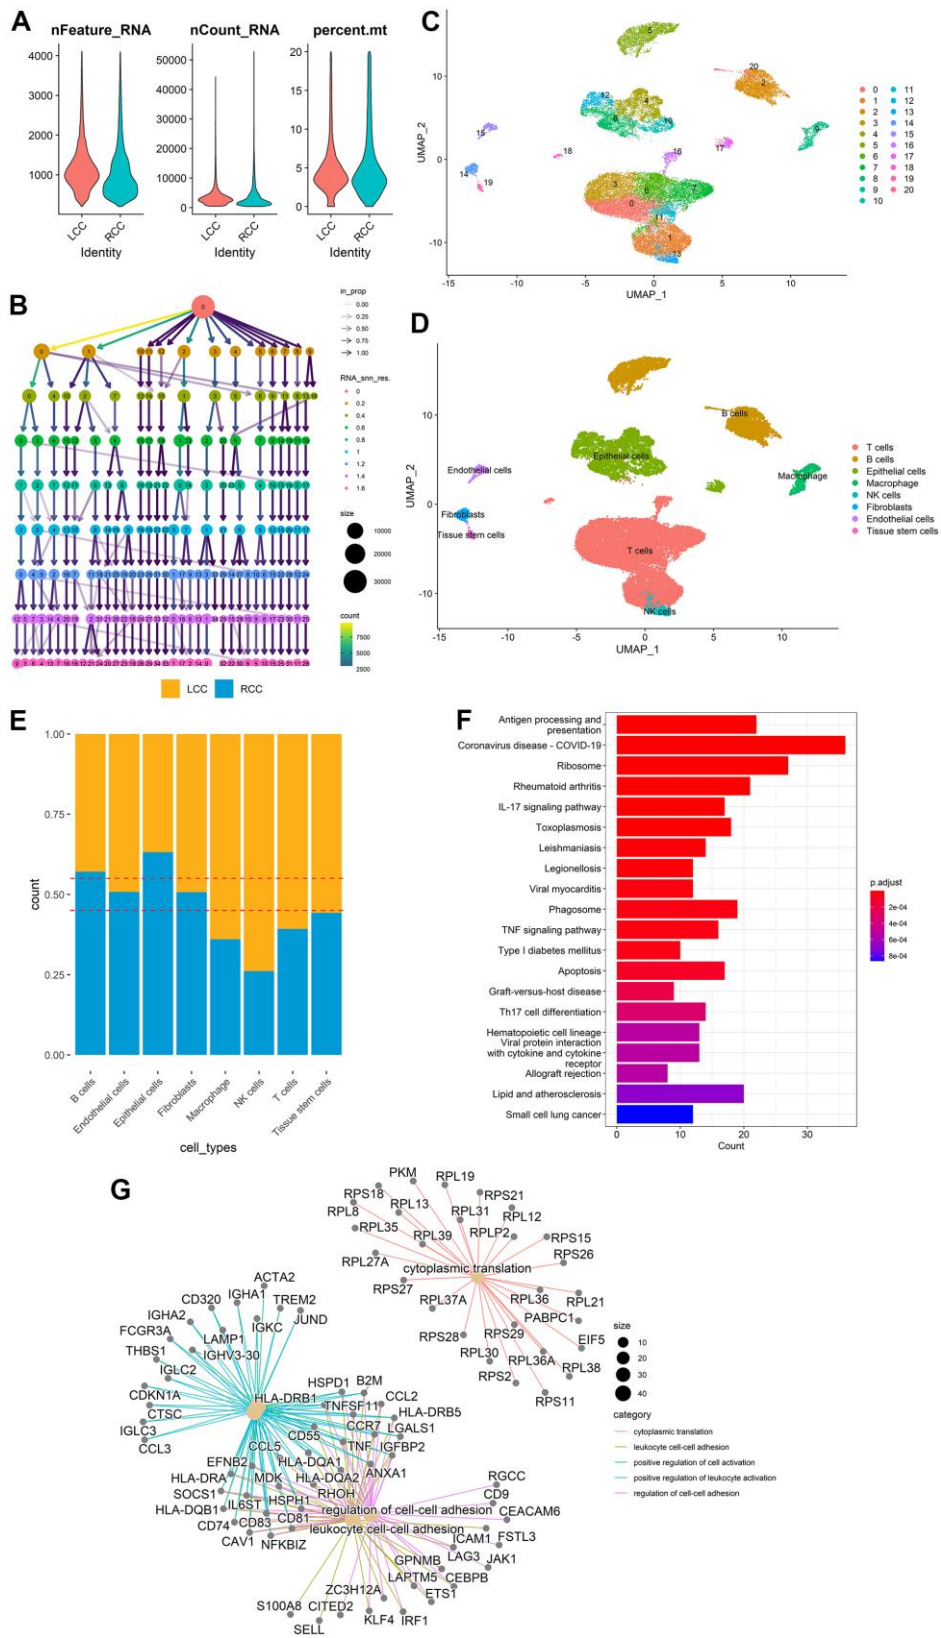

**Figure 2. DEG identification between LCC and RCC in different cell types from scRNA-seq data.** (A) scRNA-seq data quality control for LCC and RCC cells. (B) A cluster tree with a resolution range of 0 to 1.6. (C) All cells were classified into 21 clusters using the UMAP algorithm. (D) The clusters were annotated into eight main cell types using the *singleR* R package. (E) LCC and RCC distributions for each annotated cell type. (F) DEGs KEGG analysis results. (G) DEGs GO analysis results.

**Table 2. The statistics of DEGs between LCC and RCC in each annotated cell type.**

| Cell type         | Cluster number    | Up-regulated genes | Down-regulated genes | All genes |
|-------------------|-------------------|--------------------|----------------------|-----------|
| T cells           | 0,1,3,5,6,7,11,16 | 62                 | 14                   | 76        |
| B cells           | 2,5,20            | 122                | 27                   | 149       |
| Epithelial cells  | 4,8,10,12,17      | 81                 | 60                   | 141       |
| NK cells          | 13                | 104                | 26                   | 130       |
| Macrophage        | 9                 | 40                 | 22                   | 66        |
| Fibroblasts       | 14                | 66                 | 62                   | 128       |
| Endothelial cells | 15                | 33                 | 33                   | 66        |
| Tissue stem cells | 19                | 139                | 108                  | 247       |

### Construction and validation of prognostic models for LCC or RCC patients

Based on TCGA-COAD cohort, we observed that the survival time was significantly longer in LCC patients than in RCC patients ( $P = 0.038$ ; Supplementary Figure 1A). However, survival time did not differ significantly between patients with CC in the transverse section and LCC ( $P = 0.830$ ) or RCC ( $P = 0.530$ ) patients. In the GSE103479 cohort, the prognosis of LCC patients was also significantly better than that of RCC patients ( $P = 0.043$ , Supplementary Figure 1B). In TCGA-COAD cohort, the relationship between CMS and OS was not significant ( $P > 0.05$ , Supplementary Figure 1C). In GSE103479 cohort, CMS3 had the best OS, while CMS1 had the worst OS (Supplementary Figure 1D).

The Kaplan–Meier survival analysis identified 17 genes significantly associated with LCC patient prognosis and 20 genes significantly associated with RCC patient prognosis ( $P < 0.05$ ; Supplementary Table 3). Univariate Cox regression analysis indicated that five were independent indicators for LCC patients and eight for RCC patients (Table 3). After further shrinkage through LASSO regression, we selected five genes for LCC patients and four for RCC patients. The coefficient of each prognostic signature was shown in Supplementary Figure 1E, 1F. The Kaplan–Meier curves of those genes were shown in Supplementary Figure 2.

In the prognostic model for LCC patients, two genes (FosB proto-oncogene AP-1 transcription factor subunit [*FOSB*] and chromosome 11 open reading frame 96 [*C11orf96*]) were risk factors (hazard ratio [HR]  $> 1$ ), while three (ribosomal protein L35 [*RPL35*], regenerating family member 1 alpha [*REG1A*], and tescalcin [*TESC*]) were protective factors (HR  $< 1$ ; Figure 3A). The heatmap showed that the risk factors were downregulated in the low-risk group and upregulated in the high-risk group (Figure 3B). In contrast, the protective factors showed the opposite

pattern. The scatter diagram in Figure 3B indicated that the OS of patients was better in the low-risk group than in the high-risk group, consistent with the results in Figure 3C ( $P = 9.7 \times 10^{-4}$ ). The areas under the ROC curve (AUC) for the prognostic model at 3-, 4-, and 5-year OS are 0.721, 0.844, and 0.926, respectively (Figure 3D).

There were four genes in the prognostic model for RCC patients. One (heat shock protein family A member 1A [*HSPA1A*]) was a risk factor (HR  $> 1$ ), and three (cluster of differentiation 69 [*CD69*], growth differentiation factor 15 [*GDF15*], and galectin 2 [*LGALS2*]) were protective factors (HR  $< 1$ ; Figure 3E). Consistent with the prognostic model for LCC patients, we found that the expression of risk factor was low in low-risk patients and high in high-risk patients. In contrast, the protective factors showed the opposite pattern (Figure 3F). In addition, patients in the low-risk group had better prognoses than those in the high-risk group ( $P < 1.0 \times 10^{-4}$ ; Figure 3G). The model's AUCs were 0.806 for 3-year OS, 0.816 for 4-year OS, and 0.836 for 5-year OS (Figure 3H).

We further validated the effectiveness of the identified prognostic markers based on GSE103479 cohort. Consistent with the results obtained in the prognosis model based on TCGA-COAD cohort, in the LCC prognosis model, the prognosis of patients with low-risk patients was significantly better than that of patients with low-risk score ( $P = 0.014$ , Supplementary Figure 3A), and the AUC for the prognostic model at 3-, 4-, and 5-year OS are 0.680, 0.688, and 0.615, respectively (Supplementary Figure 3B). In the RCC prognosis model, the low-risk patients' OS was significantly longer than high-risk patients' OS ( $P = 0.012$ , Supplementary Figure 3C), and the model's AUCs were 0.615 for 3-year OS, 0.710 for 4-year OS, and 0.639 for 5-year OS (Supplementary Figure 3D).

**Table 3. The detailed information of the potential independent signatures for patients with LCC or RCC.**

| Patients | Prognostic signatures | HR                | HR.95L            | HR.95H            | p.value               |
|----------|-----------------------|-------------------|-------------------|-------------------|-----------------------|
| RCC      | HSPA1A                | 1.41356217671282  | 1.16350097826825  | 1.71736686496571  | 0.00049297581800357   |
|          | FOS                   | 0.81584830453234  | 0.673878317257311 | 0.987727960616577 | 0.0369283627502978    |
|          | CD69                  | 0.78042371991399  | 0.641390931256157 | 0.949594315921415 | 0.0132626664542913    |
|          | RHOH                  | 0.800002515242927 | 0.64806037197813  | 0.987568523039716 | 0.0378600748868144    |
|          | KLF4                  | 0.775803574145191 | 0.607680844919644 | 0.99043962087704  | 0.0416450641807661    |
|          | TFF1                  | 0.905647012239849 | 0.823929582435838 | 0.995469186036703 | 0.039967568997509     |
|          | GDF15                 | 0.622015292962873 | 0.495507478853596 | 0.780821765949578 | 0.0000426660693411279 |
| LCC      | LGALS2                | 0.833641956980532 | 0.705030165125973 | 0.985715146406761 | 0.0333158089764621    |
|          | FOSB                  | 1.38792045878328  | 1.12035352253476  | 1.71938871183352  | 0.00269970420423281   |
|          | RPL35                 | 0.503130789685977 | 0.303313150461264 | 0.834584953356195 | 0.00780834395123433   |
|          | REG1A                 | 0.88427652277397  | 0.798529419282176 | 0.979231259171564 | 0.0181153181968568    |
|          | TESC                  | 0.774472331024749 | 0.604301611845149 | 0.992562951621926 | 0.0434941395308241    |
|          | C11orf96              | 1.51919402433543  | 1.05004983019869  | 2.1979437710492   | 0.0264780661405852    |

Abbreviation: HR, hazard ratio.

We also evaluated the performance of prognostic model in predicting tumor staging and microsatellite status based on TCGA-COAD cohort. In the RCC prognostic model, higher risk scores were significantly associated with greater metastasis ( $P = 2.6 \times 10^{-5}$ ; Figure 4A), N stage ( $P = 0.012$ ; Figure 4B), advanced pathological stage ( $P = 1.4 \times 10^{-4}$ ; Figure 4C), and more stable microsatellite status ( $P = 0.007$ ; Figure 4D) but not T stage ( $P = 0.200$ ; Figure 4E). However, in the LCC prognostic model, risk scores were not significantly associated with tumor stage and microsatellite status ( $P > 0.05$ ; Supplementary Figure 3E–3I), potentially reflecting the small sample size at a certain level ( $<30$ ; Table 1), leading to no statistical significance.

### The expression of the candidate prognostic genes in scRNA-seq and bulk RNA-seq datasets

Based on scRNA-seq dataset GSE200997, the differential expression of the marker genes between LCC cells and RCC cells in each annotated cell type was shown in Table 4. We observed that *HSPA1A* was expressed in all RCC cell types, *CD69* was mainly expressed in immune-related cell types, including T, B, and natural killer cells; while *GDF15* was mainly expressed in epithelial cells, and *LGALS2* was expressed in epithelial cells and macrophages (Figure 4F). *FOSB* and *RPL35* were expressed in all LCC cell types; while *REG1A* was expressed in epithelial cells; *TESC* was mainly expressed in T, B, and epithelial cells; and *C11orf96* was mainly expressed in fibroblasts and tissue stem cells (Figure 4G).

Based on another scRNA-seq dataset GSE14473, we validated the expression differences of the candidate markers between LCC and RCC cells, and we found that all candidate markers were significantly differentially expressed except for *C11orf96* (Table 5). Moreover, we also observed the expression patterns of the candidate markers in the cells types was similar to those of the dataset GSE200997 (Supplementary Figure 4A, 4B).

Additionally, we investigated the expression differences of the candidate biomarkers in two bulk RNA-seq dataset. Based on the TCGA-COAD cohort, we observed that only *REG1A* and *CD69* were significantly differential expressed between LCC and RCC patients ( $P < 0.05$ , Figure 4H). In the dataset GSE103479, all the candidate markers were not significantly differential expressed between LCC and RCC patients ( $P > 0.05$ , Supplementary Figure 4C).

Based on the two bulk RNA-seq datasets, we exhibited the proportions of LCC and RCC patients in each CMS group (Figure 4I, 4J). We observed that *FOSB* and *GDF15* were significantly expressed among CMS groups in both the two bulk RNA-seq cohorts ( $P < 0.05$ , Figure 4K and Supplementary Figure 4D).

### TME differences between LCC and RCC patients

Based on the TCGA-COAD cohort, the proportions of 22 immune cell types were estimated in LCC and RCC patients using the CIBERSORT algorithm. The immune-infiltrating profiles of LCC and RCC patients



are shown in Supplementary Figure 3A, 3B. When we compared the composition of immune cell types between LCC and RCC patients, we found significant differences in CD8 and regulatory (Tregs) T cells and M0, M1, and M2 macrophages (Figure 5A).

In the LCC prognostic model, the immune-infiltrating degree of M2 macrophages was positively correlated with risk score ( $cor = 0.181, P = 0.045$ ; Figure 5B), while the immune-infiltrating degree of activated CD4

memory T cells was negatively correlated ( $cor = -0.185, P = 0.041$ ; Figure 5C). In the RCC prognostic model, the immune-infiltrating degree of Tregs was positively correlated with risk score ( $cor = 0.229, P = 0.002$ ; Figure 5D), while the immune-infiltrating degree of resting CD4 memory T cells was negatively correlated ( $cor = -0.332, P = 4.0 \times 10^{-6}$ ; Figure 5E).

Additionally, we plotted and compared the mutation profiles of LCC and RCC patients using the *maftools*

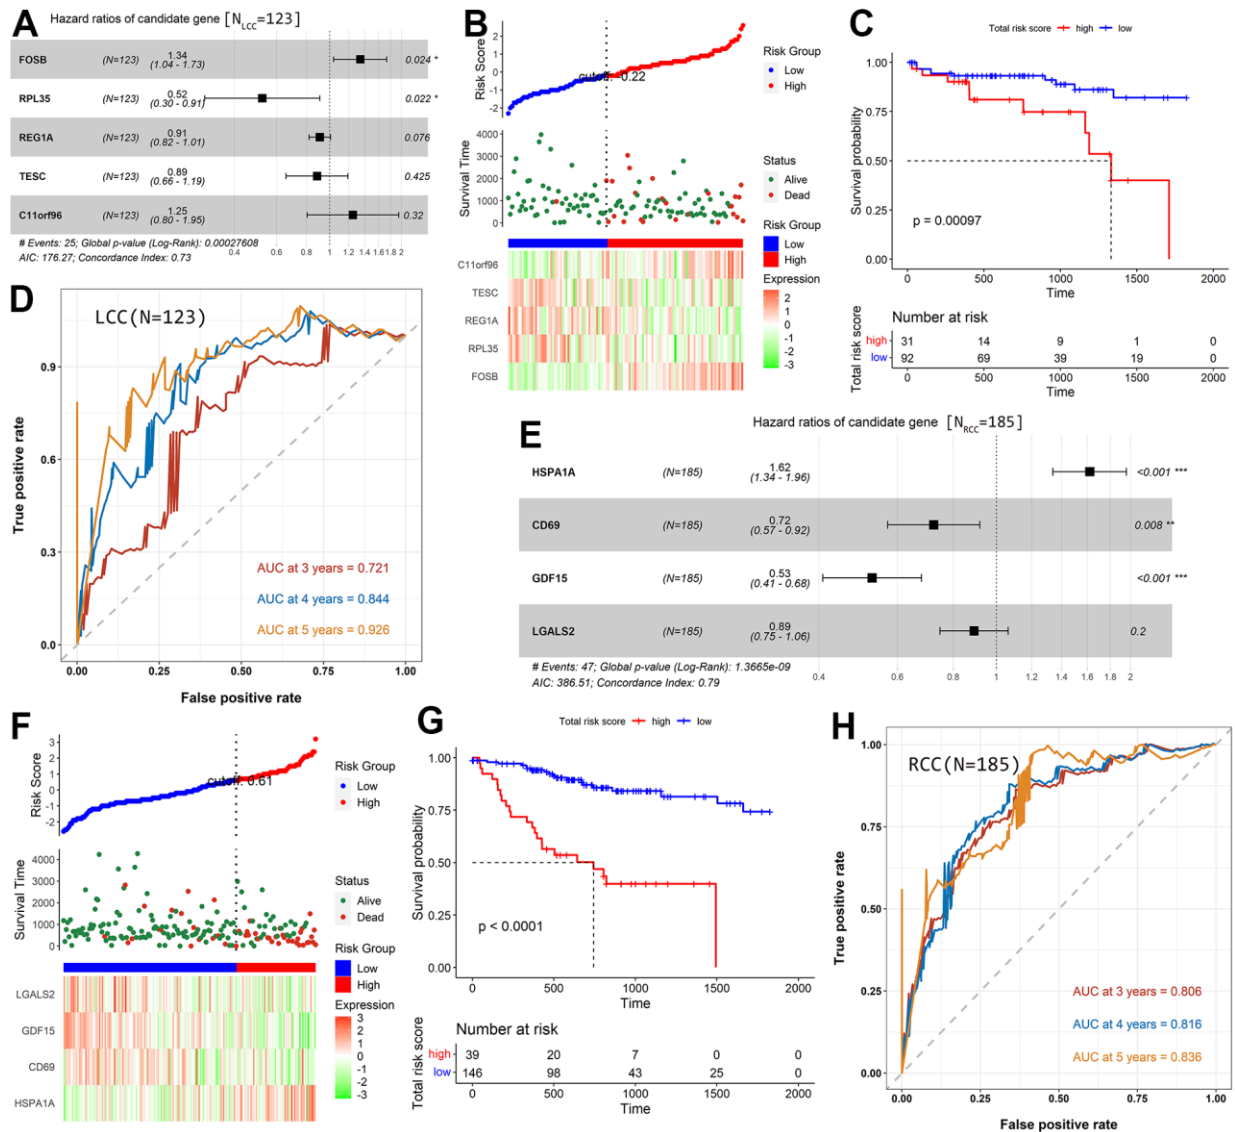

**Figure 3. Construction and evaluation of prognostic models for LCC and RCC patients based on TCGA-COAD cohort.** (A) A Forest plot shows the HR value of each candidate prognostic gene for LCC patients. (B) The distribution of LCC patients in the high- and low-risk score groups and their relationship with OS and the expression pattern of five prognostic genes. (C) A Kaplan–Meier curve shows that LCC patient OS was significantly higher in the low-risk score group than in the high-risk score group. (D) The AUCs of the prognostic model for LCC patients. (E) A Forest plot showing the HR value of each candidate prognostic gene in RCC patients. (F) The distribution of RCC patients in the high- and low-risk score groups and their relationship with OS and the expression pattern of four prognostic genes. (G) A Kaplan–Meier curve shows that RCC patient OS was significantly higher in the low-risk score group than in the high-risk score group. (H) The AUCs of the prognostic model for RCC patients.

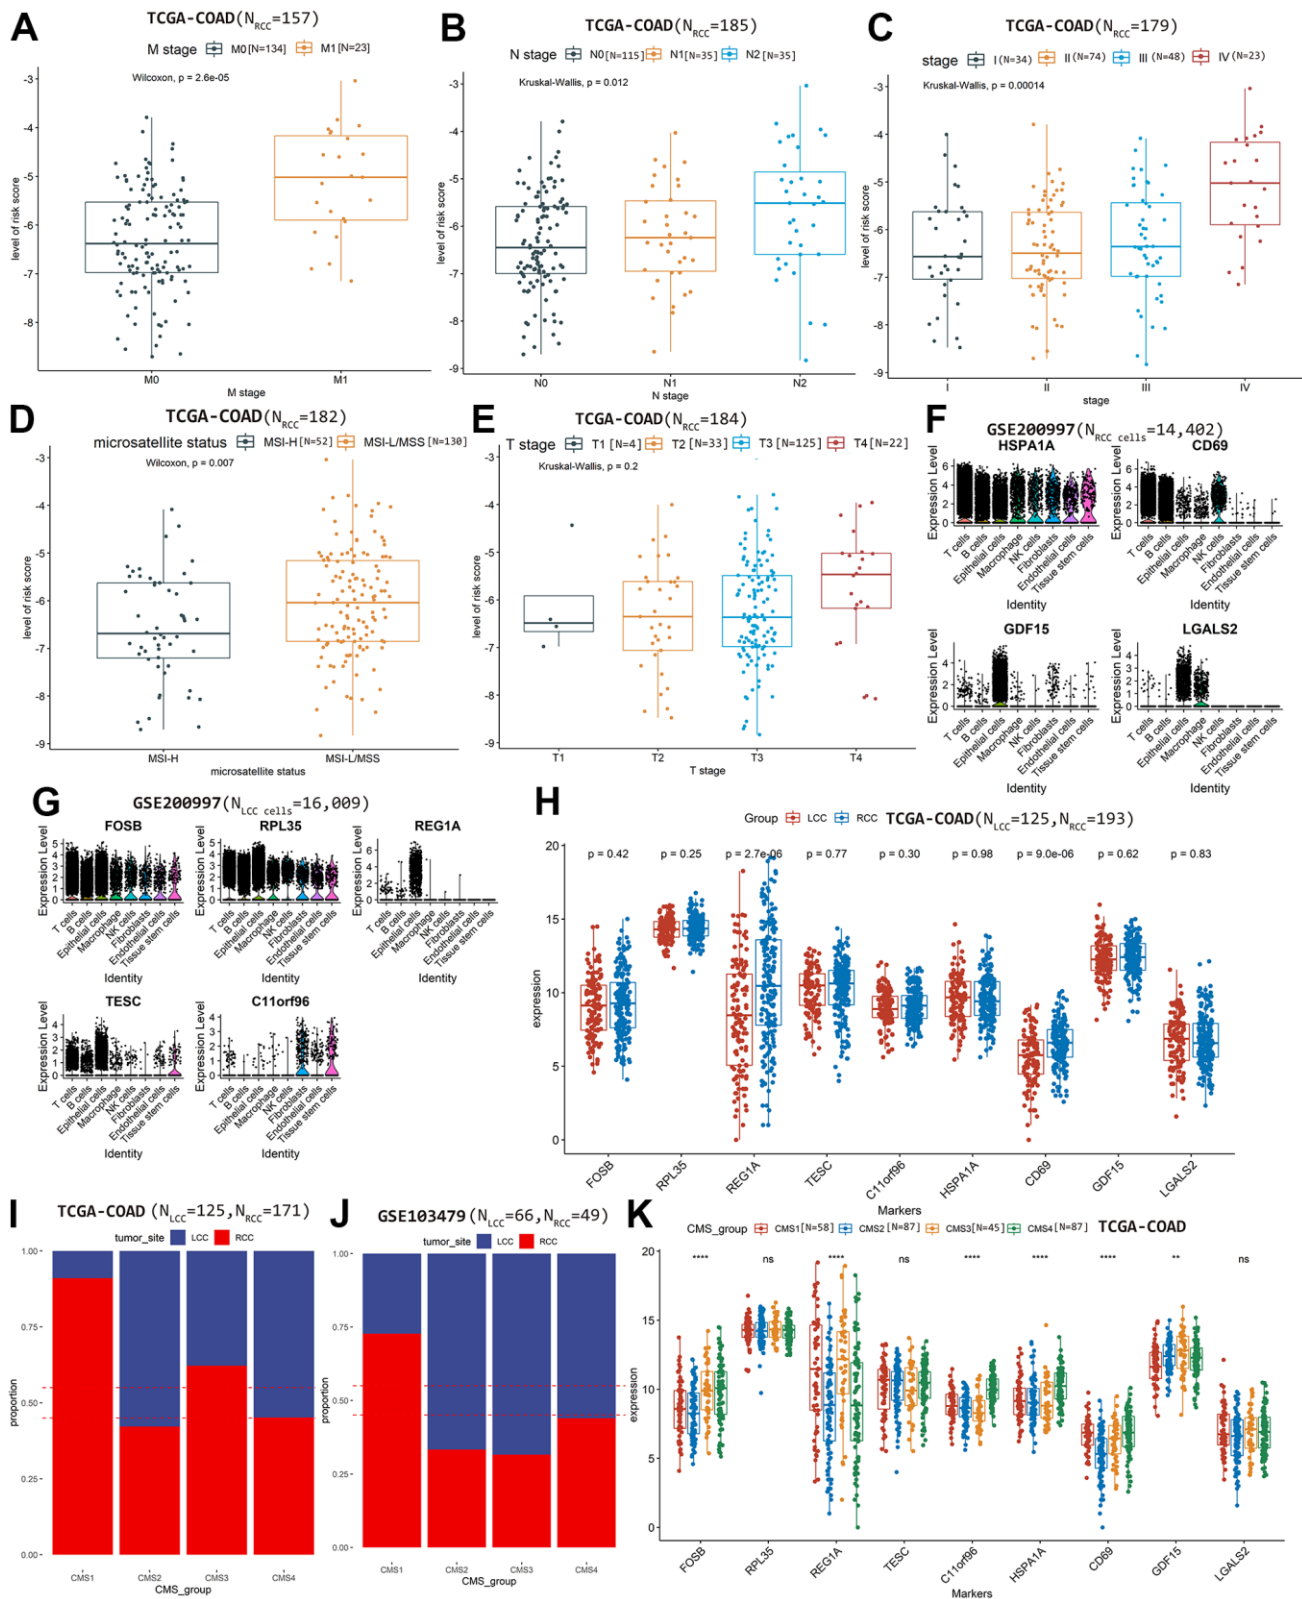

**Figure 4.** The relationship between the risk score of RCC prognostic model and clinical features, (A) M stage, (B) N stage, (C) Advanced pathological stages, (D) Microsatellite status, (E) T stage. The prognostic markers' expression level in each cell types based on scRNA-seq dataset GSE200997, (F) RCC cells, (G) LCC cells. (H) Comparing the differences of markers' expression between LCC and RCC samples based on TCGA-COAD cohort. Comparing the proportions of LCC and RCC patients in each CMS group on TCGA-COAD cohort (I) and GSE103479 (J). (K) Comparing the expression differences of markers among CMS groups based on TCGA-COAD cohort.

**Table 4. The differential expression of the marker genes between LCC cells and RCC cells in each cell type based on GSE200997.**

| Markers         | myAUC | avg_diff     | Power | avg_log2FC   | pct.1 | pct.2 | Celltypes   |
|-----------------|-------|--------------|-------|--------------|-------|-------|-------------|
| <i>FOSB</i>     | 0.599 | 0.4618231    | 0.198 | 0.666269896  | 0.562 | 0.373 | T Cells     |
| <i>HSPA1A</i>   | 0.824 | 2.278156184  | 0.648 | 3.286684629  | 0.752 | 0.154 | T Cells     |
| <i>FOSB</i>     | 0.637 | 0.662858049  | 0.274 | 0.95630202   | 0.579 | 0.361 | B Cells     |
| <i>HSPA1A</i>   | 0.776 | 2.163085844  | 0.552 | 3.120673221  | 0.635 | 0.118 | B Cells     |
| <i>CD69</i>     | 0.682 | 1.277230084  | 0.364 | 1.842653508  | 0.642 | 0.374 | B Cells     |
| <i>FOSB</i>     | 0.58  | 0.423361877  | 0.16  | 0.61078208   | 0.593 | 0.481 | NK cells    |
| <i>HSPA1A</i>   | 0.818 | 2.235335966  | 0.636 | 3.224908112  | 0.704 | 0.084 | NK cells    |
| <i>HSPA1A</i>   | 0.565 | 0.447071753  | 0.13  | 0.644988201  | 0.664 | 0.601 | macrophage  |
| <i>CD69</i>     | 0.564 | 0.622492906  | 0.128 | 0.898067428  | 0.216 | 0.092 | macrophage  |
| <i>RPL35</i>    | 0.645 | 0.579500519  | 0.29  | 0.836042525  | 0.854 | 0.789 | epithelial  |
| <i>REG1A</i>    | 0.431 | -1.121210588 | 0.138 | -1.617564954 | 0.03  | 0.168 | epithelial  |
| <i>TESC</i>     | 0.436 | -0.676260355 | 0.128 | -0.97563746  | 0.15  | 0.264 | epithelial  |
| <i>GDF15</i>    | 0.565 | 0.652976527  | 0.13  | 0.942045997  | 0.521 | 0.455 | epithelial  |
| <i>LGALS2</i>   | 0.442 | -0.901389298 | 0.116 | -1.30042987  | 0.05  | 0.162 | epithelial  |
| <i>C11orf96</i> | 0.571 | 0.454403273  | 0.142 | 0.655565348  | 0.46  | 0.362 | fibroblasts |
| <i>HSPA1A</i>   | 0.388 | -0.843405708 | 0.224 | -1.216777233 | 0.684 | 0.751 | fibroblasts |
| <i>GDF15</i>    | 0.424 | -0.562241804 | 0.152 | -0.811143462 | 0.107 | 0.258 | fibroblasts |
| <i>FOSB</i>     | 0.403 | -0.434459647 | 0.194 | -0.626792779 | 0.422 | 0.581 | endothelial |
| <i>C11orf96</i> | 0.566 | 0.503324559  | 0.132 | 0.726143845  | 0.286 | 0.167 | endothelial |
| <i>HSPA1A</i>   | 0.373 | -0.646403691 | 0.254 | -0.932563399 | 0.656 | 0.747 | endothelial |
| <i>FOSB</i>     | 0.388 | -0.481429936 | 0.224 | -0.694556582 | 0.382 | 0.617 | stem cells  |
| <i>C11orf96</i> | 0.561 | 0.527176636  | 0.122 | 0.760555119  | 0.52  | 0.469 | stem cells  |
| <i>HSPA1A</i>   | 0.31  | -1.093683253 | 0.38  | -1.577851406 | 0.598 | 0.815 | stem cells  |

- The red color means markers for LCC.
- The green color means markers for RCC.
- The cyan color means type1 cells.
- The lawngreen color means type2 cells.
- The brown color means type3 cells.

**Table 5. The differential expression of the marker genes in each cell type based on GSE14473.**

| Markers         | myAUC | avg_diff | power | avg_log2FC  | pct.1 | pct.2 | celltypes        |
|-----------------|-------|----------|-------|-------------|-------|-------|------------------|
| <i>HSPA1A</i>   | 0.585 | 17.67964 | 0.17  | 0.909902001 | 0.38  | 0.24  | T Cells          |
| <i>FOSB</i>     | 0.262 | 6.571136 | 0.476 | -0.97096937 | 0.46  | 0.78  | B cells          |
| <i>RPL35</i>    | 0.713 | 3.467668 | 0.426 | 0.668682238 | 0.976 | 0.919 | B cells          |
| <i>CD69</i>     | 0.692 | 34.30116 | 0.384 | 0.987759617 | 0.485 | 0.114 | B cells          |
| <i>REG1A</i>    | 0.449 | -181.39  | 0.102 | -1.06795157 | 0.004 | 0.105 | Epithelial cells |
| <i>TESC</i>     | 0.344 | -7.81038 | 0.312 | -0.82064498 | 0.151 | 0.45  | Epithelial cells |
| <i>HSPA1A</i>   | 0.699 | 5.855744 | 0.398 | 1.225526512 | 0.52  | 0.135 | Epithelial cells |
| <i>GDF15</i>    | 0.319 | -12.5721 | 0.362 | -1.2395757  | 0.161 | 0.499 | Epithelial cells |
| <i>LGALS2</i>   | 0.312 | -21.5721 | 0.376 | -1.59399592 | 0.141 | 0.487 | Epithelial cells |
| <i>C11orf96</i> | 0.397 | -2.6086  | 0.206 | -0.39939187 | 0.238 | 0.436 | Stromal cells    |

R package. While the top 10 mutated genes in LCC and RCC patients were similar, their ranking differed. The median number of mutations in LCC patients was higher than in RCC patients. In LCC and RCC

patients, the most common variant type was single nucleotide polymorphisms (SNP), the most common SNP classification was missense, and the most common SNP class was C>T (Figure 5F, 5G). Among

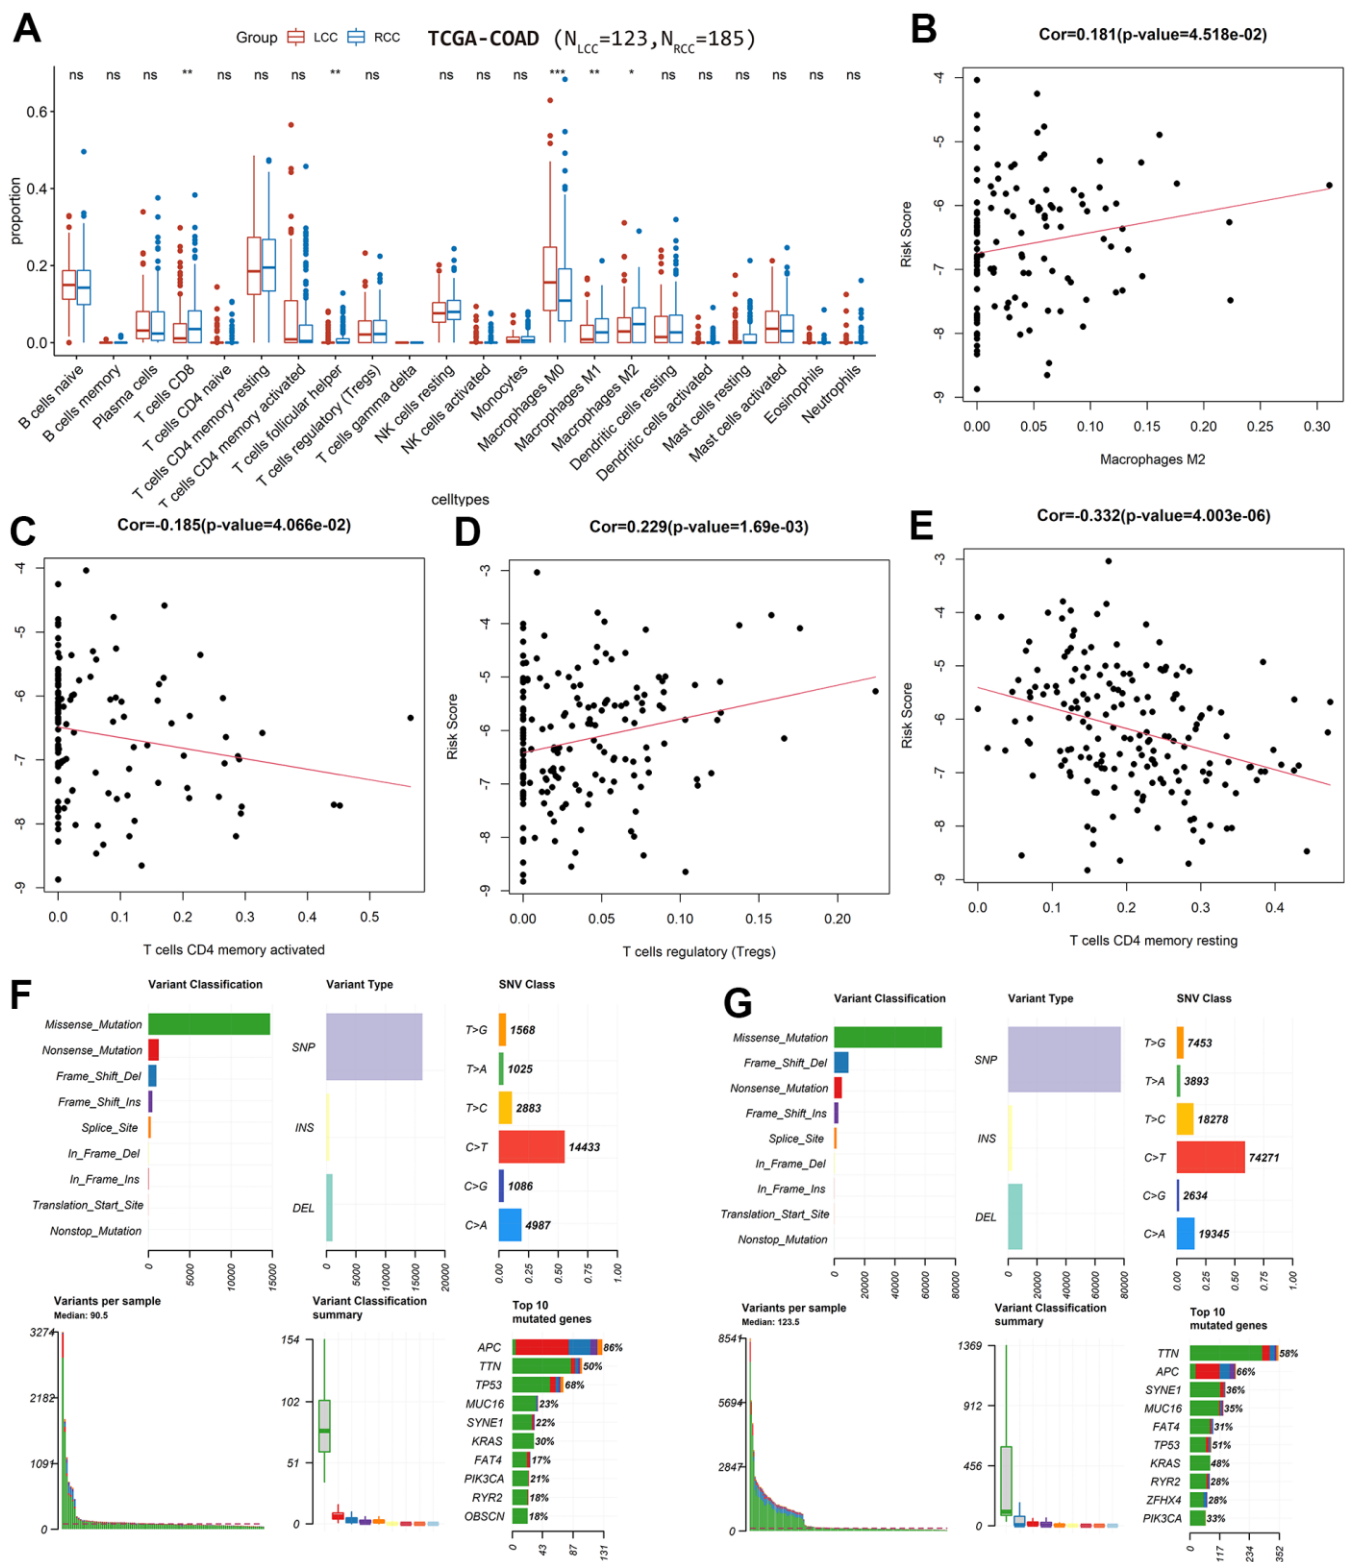

**Figure 5. Differences in immune-infiltrating and mutation profiles between LCC and RCC patients based on TCGA-COAD cohort.** (A) Differences in the composition of immune cell types between LCC and RCC patients. (B) The correlation between the immune-infiltrating degree of M2 macrophages with LCC patient risk scores. (C) The correlation between the immune-infiltrating degree of activated CD4 memory T cells with LCC patient risk scores. (D) The correlation between the immune-infiltrating degree of Tregs with RCC patient risk scores. (E) The correlation between the immune-infiltrating degree of resting CD4 memory T cells with RCC patient risk scores. (F) LCC patients' mutation profiles. (G) RCC patients' mutation profiles.



the top 10 mutated genes, adenomatous polyposis coli regulator of WNT signaling pathway (*APC*) and tumor protein p53 (*TP53*) mutation rates were significantly higher in LCC patients ( $P < 0.05$ ). In contrast, Kirsten rat sarcoma virus proto-oncogene GTPase (*KRAS*), spectrin repeat containing nuclear envelope protein 1 (*SYNE1*), and mucin 16 cell surface associated (*MUC16*) the mutation rates were significantly higher in RCC patients ( $P < 0.05$ ; Figure 6A). Moreover, the mutation status of *TP53* was significantly associated with OS in RCC patients ( $HR = 1.9$ ,  $P = 0.036$ ; Figure 6B) but not in LCC patients ( $HR = 1.19$ ,  $P = 0.695$ ; Figure 6C). The mutation statuses of *APC*, *KRAS*, *SYNE1*, and *MUC16* were not significantly associated with OS in LCC or RCC patients ( $P > 0.05$ ; Supplementary Figure 5C–5J). Figure 6D, 6E shows that the fractions of pathways and samples affected by the oncogenic pathways in RCC patients were higher than in LCC patients.

We also calculated and visualized each sample's TMB value. The median TMB value was 1.81/Mb in LCC patients (Supplementary Figure 5K) and 2.47/Mb in RCC patients (Supplementary Figure 5L). TMB values were significantly higher in RCC patients than in LCC patients ( $P = 5.9 \times 10^{-8}$ ; Figure 6F). Moreover, LCC patients with lower TMB values had better OS ( $P = 0.019$ ; Figure 6G). However, TMB values were not significantly associated with OS in RCC patients ( $P = 0.110$ ; Figure 6H).

### Prediction and comparison of the drug response in LCC and RCC patients

Figure 7A exhibited that the expression level of immune checkpoint targets in TMB-high group was significantly higher than that in TMB-low group ( $P < 0.05$ ). And the expression of immune checkpoint targets in RCC patients was significantly higher than in LCC patients ( $P < 0.05$ ; Figure 7B). Among LCC patients, the expression of immune checkpoint targets was significantly higher in the high-risk group than in the low-risk group, indicating that the high-risk group would be more sensitive to immunotherapy ( $P < 0.05$ , Figure 7C). Among RCC patients, cluster of differentiation 274 (*CD274*), cytotoxic T-lymphocyte associated protein 4 (*CTLA4*), and T cell immunoreceptor with Ig and ITIM domains (*TIGIT*) expression were significantly higher in the low-risk group than in the high-risk group. However, lymphocyte activating 3 (*LAG3*), programmed cell death 1 (*PDCD1*), and hepatitis A virus cellular receptor 2 (*HAVCR2*) expression did not differ significantly between the high- and low-risk groups (Figure 7D). Therefore, low-risk RCC patients are more likely to benefit from immunotherapy drugs targeting CD274, CTLA4, or TIGIT.

Additionally, we found that CC patients were sensitive to 44 drugs (average  $IC_{50} < 5$ ; Supplementary Table 4), of which eight were related to CC treatment. Figure 7E shows that sensitivity to these eight drugs does not differ significantly between LCC and RCC patients ( $P > 0.05$ ). In addition, drug response sensitivity did not differ significantly between high-risk and low-risk LCC patients ( $P > 0.05$ , Figure 7F). However, the average  $IC_{50}$  values for camptothecin, teniposide, vinorelbine, and mitoxantrone were significantly lower in low-risk than in high-risk RCC patients, indicating that low-risk patients will be more sensitive to them (Figure 7G–7J). Sensitivity to the other four drugs did not differ significantly between high-risk and low-risk RCC patients (Figure 7K–7N).

## DISCUSSION

Extensive studies have identified various signatures for predicting CC prognosis, diagnosis, and treatment [21–23]. However, CC shows significant tumor-location-based differences, including phenotypic characteristics, TME, and treatment response [9, 24–26]. Consistent with a previous study [7], our study found that prognosis was significantly better in LCC than in RCC patients (Supplementary Figure 1A, 1B). To further understand the differences between LCC and RCC, we identified DEGs between LCC and RCC cells for each cell type based on scRNA-seq data.

The common prognostic models are mainly based on gene-sequencing dataset. For example, Liu et al. [27] found that nine ferroptosis-related long noncoding RNAs could be used as prognostic markers of COAD, and the prognostic signature has a good predictive value because of the  $AUC > 0.8$  for 5-year survival. However, our study built prognostic models for LCC or RCC patients through TCGA-COAD, where the 5-year OS AUCs for the LCC and RCC models were 0.926 and 0.836, respectively, suggesting that our prognostic models had better performance. In addition, similar to other study [28], the performance of the RCC model is worse than that of the LCC model. Besides, we also compared the expression differences of the identified markers in TCGA-COAD cohort (Figure 3H), and found that only *REG1A* and *CD16* were significantly differential expressed between LCC and RCC samples, which may indicate that DEGs obtained from bulk RNA-seq data cannot reflect the true expression of genes in different cell types. According the prognostic markers' expression in each cell type (Table 4), the annotated eight main cell types could be categorized into 3 types: 1) type 1 (immune cells): T cells, B cells and macrophage; 2) type 2: epithelial cells; 3) type 3 (stromal cells): fibroblasts, endothelial, and stem cells. It can be seen that the expression trend of the same gene



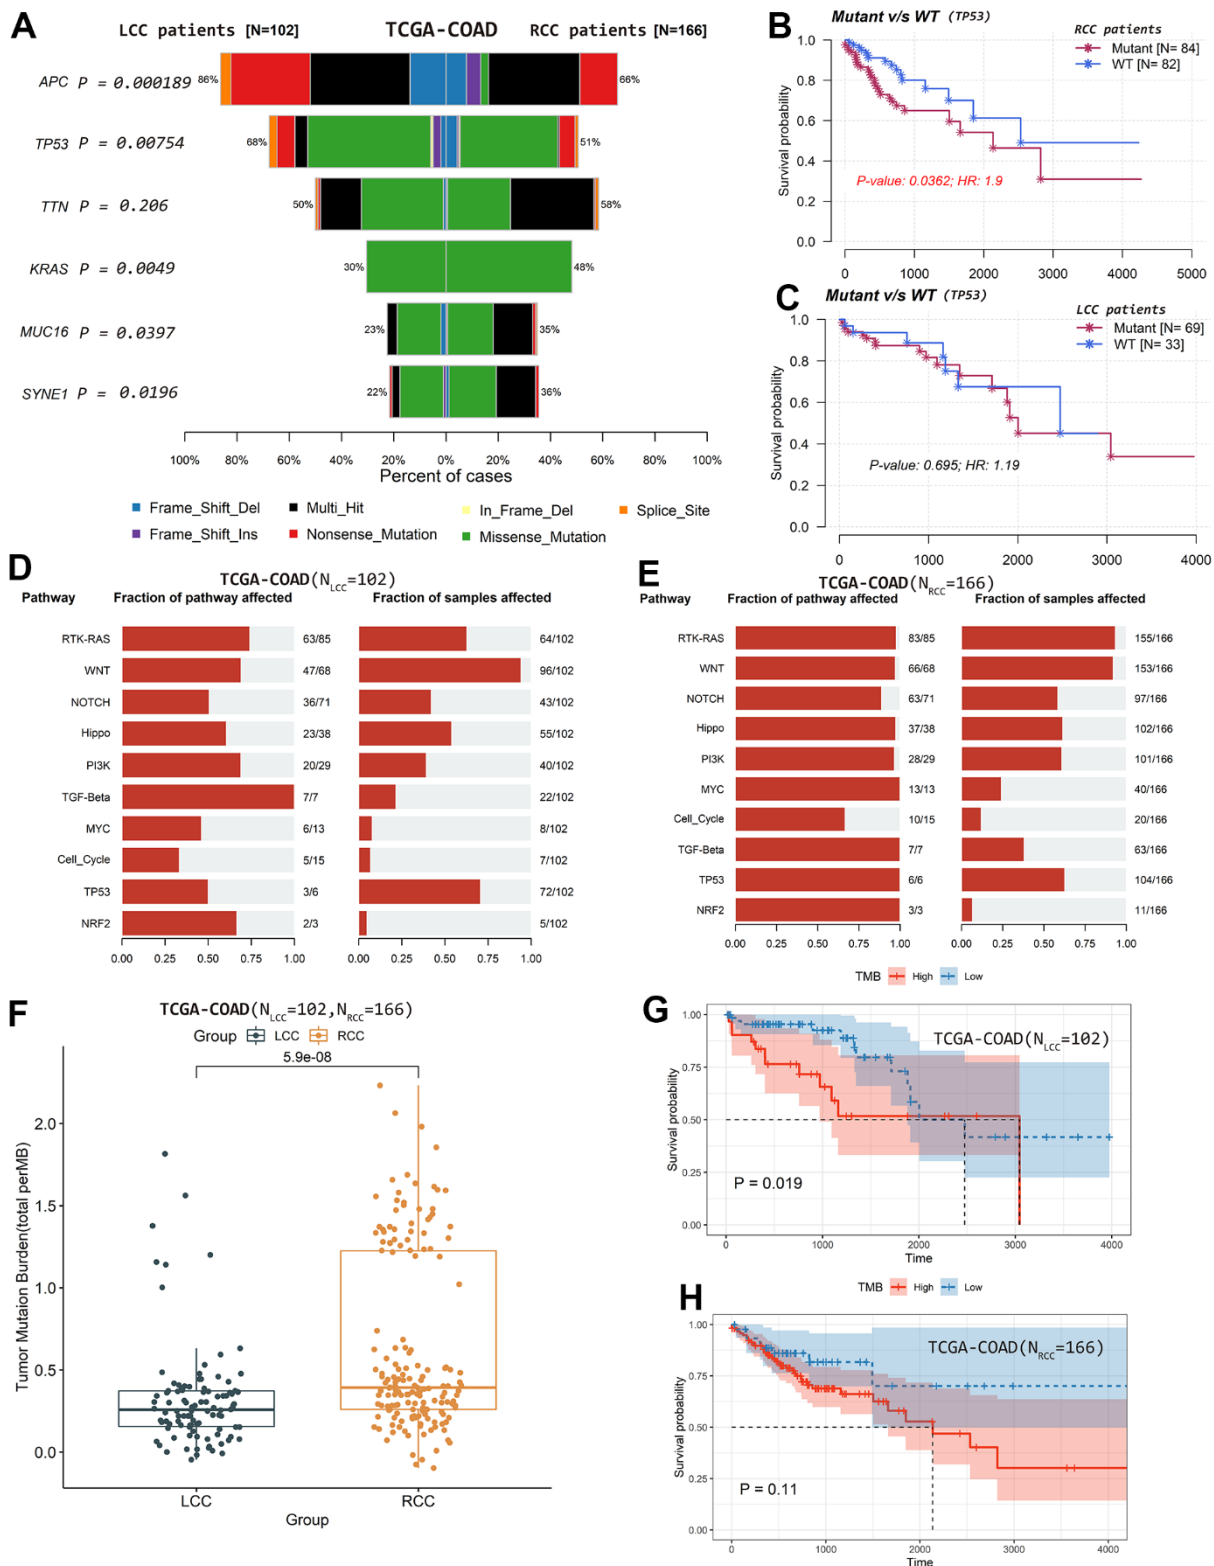

**Figure 6. Differences in mutation profiles and affected oncogenic pathways and their relationships with patient OS based on TCGA-COAD cohort.** (A) Differences in the top mutated genes. (B) *TP53* mutation status was significantly associated with OS in RCC patients. (C) *TP53* mutation status was not significantly associated with OS in LCC patients. (D) The fraction of pathways and samples affected by the oncogenic pathways in RCC patients. (E) The fraction of pathways and samples affected by the oncogenic pathways in LCC patients. (F) TMB values were significantly higher in RCC than in LCC patients. (G) LCC patients with lower TMB values had better OS. (H) TMB values were not significantly associated with OS in RCC patients.

in the same cell type is the same, but the expression trend is different in different cell types. For example, *HSPA1A* and *FOSB* are up-regulated in type 1 and down-regulated in type 3. *GDF15* is up-regulated in type 2 and down-regulated in type 3.

In the five-gene LCC prognostic model, low *C11orf96* and *FOSB* expression levels were associated with lower

risk scores and longer survival time. In contrast, the high expression levels of *REG1A*, *RPL35*, and *TESC* were associated with higher risk scores and shorter survival time. These findings indicate that *C11orf96* and *FOSB* are risk factors, while *REG1A*, *RPL35*, and *TESC* are protective factors, which is consistent with the results shown in Figure 3B. A four-gene prognostic model was also developed for RCC patients, comprising

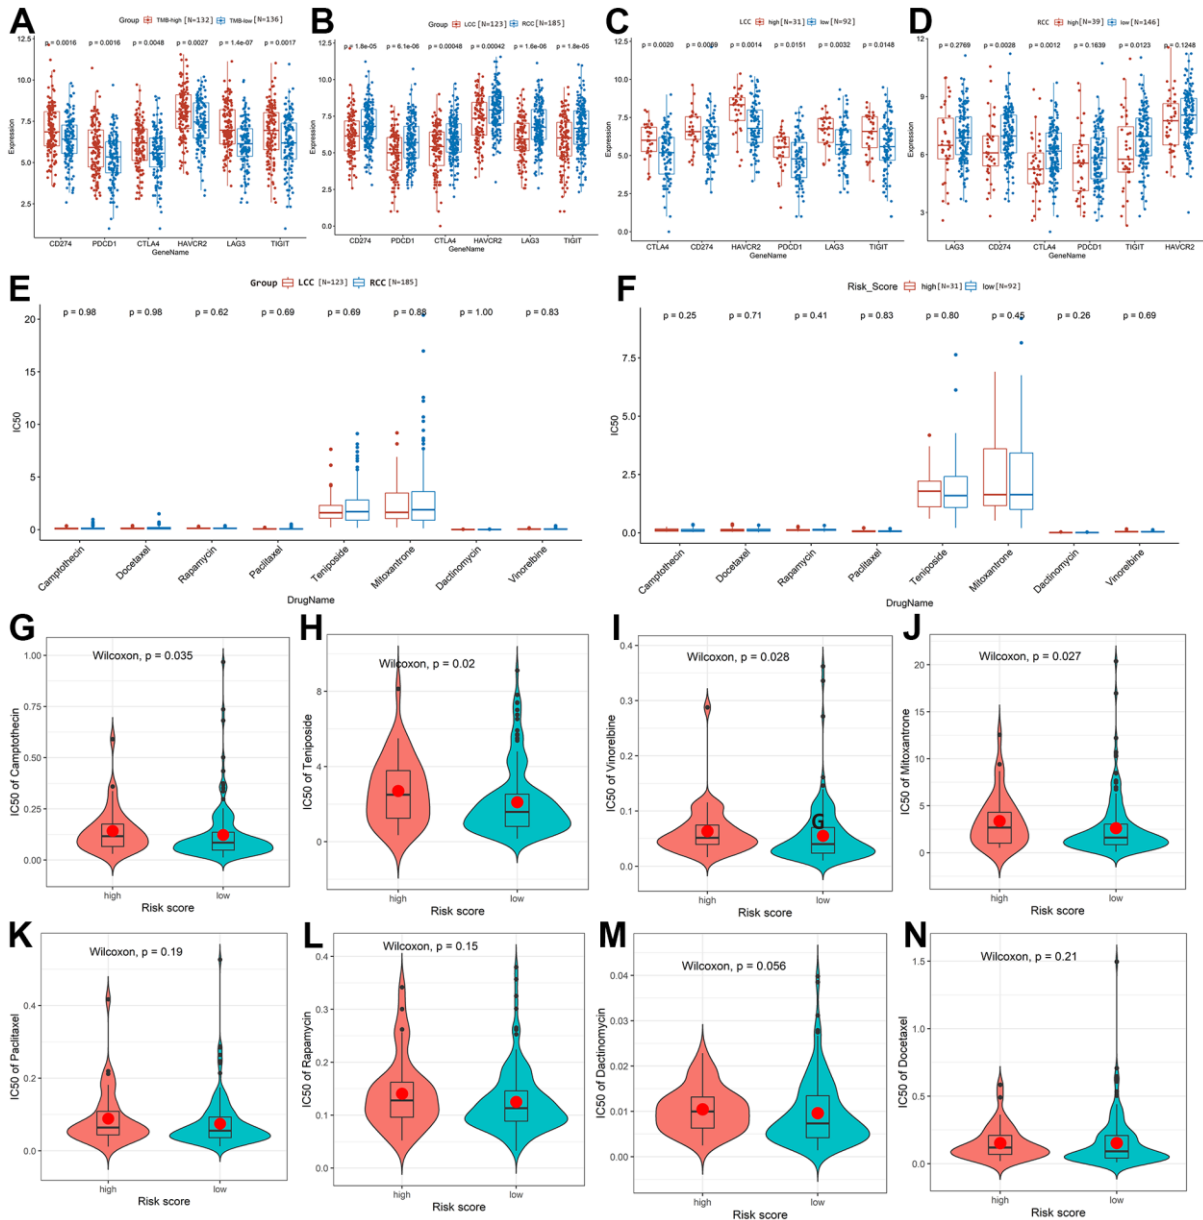

**Figure 7. Prediction and comparison of the drug response in LCC and RCC patients based on TCGA-COAD cohort.** (A) The expression of immune checkpoint targets was significantly higher in TMB-high patients than in TMB-low patients. (B) The expression of immune checkpoint targets was significantly higher in RCC patients than in LCC patients. (C) The expression of immune checkpoint targets was significantly higher in high-risk than low-risk LCC patients. (D) Comparison of immune checkpoint target expression between high-risk and low-risk RCC patients. (E) Sensitivity to the eight drugs did not differ significantly between LCC and RCC patients. (F) Drug response sensitivity did not differ significantly between high-risk and low-risk LCC patients. (G–N) Correlations between the average IC<sub>50</sub> values of the eight drugs and RCC patient risk scores.

*HSPA1A*, *CD69*, *GDF15*, and *LGALS2*. *HSPA1A* was a risk factor for RCC, while *CD69*, *GDF15*, and *LGALS2* were protective factors. *REG1A*, *RPL35*, *TESC*, *HSPA1A*, and *GDF15* have been associated with CC prognosis in all signatures [29–33].

Furthermore, we found many significant TME differences between LCC and RCC. First, while the infiltration degree of M0 macrophages was significantly higher in LCC patients than in RCC patients, the infiltration degrees of CD8 T cells and M1 macrophages were instead significantly lower. Secondly, while *APC* and *TP53* mutation rates were significantly lower in RCC patients than in LCC patients, *KRAS*, *SYNE1*, and *MUC16* mutation rates were instead significantly higher. In addition, TMB values were significantly higher in RCC patients than in LCC patients. These TME differences may cause differences in prognosis or treatment between LCC and RCC patients.

Additionally, consistent with the results found in previous study [5], patients in CMS1 subtype were mainly RCC, while CMS2 were mainly LCC (Figure 4I, 4J), which may indicate that CMS2 has better OS than CMS1 subtype. Otherwise, patients in TMB-high group had higher expression level of immune checkpoint targets than patients in TMB-low group, and the expression of immune checkpoint targets in RCC patients was significantly higher than in LCC patients, which may indicate that RCC patients were more likely to benefit from immunotherapy.

In summary, we systematically investigated differences in prognosis, TME, and treatment between RCC and LCC patients by integrative analysis of scRNA-seq and bulk RNA-seq data, providing insights into LCC and RCC heterogeneity. We also explored immunotherapy and drug chemotherapy differences between LCC and RCC patients, which may be conducive to providing patients with more accurate treatment.

## AUTHOR CONTRIBUTIONS

Lichao Cao and Danni Yao were involved in the study concept and design, and Lichao Cao was drafting the manuscript. Hezi Zhang, Shenrui Zhang and Ying Ba put forward some kind suggestions. Jin Yang and Qi Weng helped analyze and interpret the data Yanan Ren provided some kind suggestions during the article revision.

## CONFLICTS OF INTEREST

Authors Hezi Zhang, Shenrui Zhang, Qi Weng and Ying Ba were employed by Shenzhen Nucleus Gene Technology Co., Ltd. The remaining authors declare that the research was conducted in the absence of any

commercial or financial relationships that could be construed as a potential conflict of interest.

## FUNDING

No funding was provided for this study.

## REFERENCES

1. Siegel RL, Miller KD, Fuchs HE, Jemal A. Cancer statistics, 2022. *CA Cancer J Clin*. 2022; 72:7–33. <https://doi.org/10.3322/caac.21708> PMID:35020204
2. Cao L, Chen E, Zhang H, Ba Y, Yan B, Li T, Yang J. Construction of a novel methylation-related prognostic model for colorectal cancer based on microsatellite status. *J Cell Biochem*. 2021; 122:1781–90. <https://doi.org/10.1002/jcb.30131> PMID:34397105
3. Cao L, Li T, Ba Y, Chen E, Yang J, Zhang H. Exploring Immune-Related Prognostic Signatures in the Tumor Microenvironment of Colon Cancer. *Front Genet*. 2022; 13:801484. <https://doi.org/10.3389/fgene.2022.801484> PMID:35281839
4. Cao L, Ba Y, Yang J, Zhang H. Exploring immune-related signatures for predicting immunotherapeutic responsiveness, prognosis, and diagnosis of patients with colon cancer. *Aging (Albany NY)*. 2022; 14:5131–52. <https://doi.org/10.18632/aging.204134> PMID:35748788
5. Guinney J, Dienstmann R, Wang X, de Reyniès A, Schlicker A, Soneson C, Marisa L, Roepman P, Nyamundanda G, Angelino P, Bot BM, Morris JS, Simon IM, et al. The consensus molecular subtypes of colorectal cancer. *Nat Med*. 2015; 21:1350–6. <https://doi.org/10.1038/nm.3967> PMID:26457759
6. Iacopetta B. Are there two sides to colorectal cancer? *Int J Cancer*. 2002; 101:403–8. <https://doi.org/10.1002/ijc.10635> PMID:12216066
7. Mangone L, Pinto C, Mancuso P, Ottone M, Bisceglia I, Chiaranda G, Michiara M, Vicentini M, Carrozzi G, Ferretti S, Falcini F, Hassan C, Rossi PG. Colon cancer survival differs from right side to left side and lymph node harvest number matter. *BMC Public Health*. 2021; 21:906. <https://doi.org/10.1186/s12889-021-10746-4> PMID:33980174
8. Lee GH, Malietzis G, Askari A, Bernardo D, Al-Hassi HO, Clark SK. Is right-sided colon cancer different to left-sided colorectal cancer? - a systematic review. *Eur J Surg Oncol*. 2015; 41:300–8.

- <https://doi.org/10.1016/j.ejso.2014.11.001>  
PMID:[25468456](https://pubmed.ncbi.nlm.nih.gov/25468456/)
9. Grass F, Lovely JK, Crippa J, Ansell J, Hübner M, Mathis KL, Larson DW. Comparison of recovery and outcome after left and right colectomy. *Colorectal Dis.* 2019; 21:481–6.  
<https://doi.org/10.1111/codi.14543> PMID:[30585680](https://pubmed.ncbi.nlm.nih.gov/30585680/)
  10. Potter SS. Single-cell RNA sequencing for the study of development, physiology and disease. *Nat Rev Nephrol.* 2018; 14:479–92.  
<https://doi.org/10.1038/s41581-018-0021-7>  
PMID:[29789704](https://pubmed.ncbi.nlm.nih.gov/29789704/)
  11. Zhang HC, Deng SH, Pi YN, Guo JN, Xi H, Shi X, Yang XF, Zhang BM, Xue WN, Cui BB, Liu YL. Identification and Validation in a Novel Quantification System of Ferroptosis Patterns for the Prediction of Prognosis and Immunotherapy Response in Left- and Right-Sided Colon Cancer. *Front Immunol.* 2022; 13:855849.  
<https://doi.org/10.3389/fimmu.2022.855849>  
PMID:[35444656](https://pubmed.ncbi.nlm.nih.gov/35444656/)
  12. Hao Y, Hao S, Andersen-Nissen E, Mauck WM 3rd, Zheng S, Butler A, Lee MJ, Wilk AJ, Darby C, Zager M, Hoffman P, Stoeckius M, Papalexi E, et al. Integrated analysis of multimodal single-cell data. *Cell.* 2021; 184:3573–87.e29.  
<https://doi.org/10.1016/j.cell.2021.04.048>  
PMID:[34062119](https://pubmed.ncbi.nlm.nih.gov/34062119/)
  13. Butler A, Hoffman P, Smibert P, Papalexi E, Satija R. Integrating single-cell transcriptomic data across different conditions, technologies, and species. *Nat Biotechnol.* 2018; 36:411–20.  
<https://doi.org/10.1038/nbt.4096> PMID:[29608179](https://pubmed.ncbi.nlm.nih.gov/29608179/)
  14. Stuart T, Butler A, Hoffman P, Hafemeister C, Papalexi E, Mauck WM 3rd, Hao Y, Stoeckius M, Smibert P, Satija R. Comprehensive Integration of Single-Cell Data. *Cell.* 2019; 177:1888–902.e21.  
<https://doi.org/10.1016/j.cell.2019.05.031>  
PMID:[31178118](https://pubmed.ncbi.nlm.nih.gov/31178118/)
  15. Aran D, Looney AP, Liu L, Wu E, Fong V, Hsu A, Chak S, Naikawadi RP, Wolters PJ, Abate AR, Butte AJ, Bhattacharya M. Reference-based analysis of lung single-cell sequencing reveals a transitional profibrotic macrophage. *Nat Immunol.* 2019; 20:163–72.  
<https://doi.org/10.1038/s41590-018-0276-y>  
PMID:[30643263](https://pubmed.ncbi.nlm.nih.gov/30643263/)
  16. Yu G, Wang LG, Han Y, He QY. clusterProfiler: an R package for comparing biological themes among gene clusters. *OMICS.* 2012; 16:284–7.  
<https://doi.org/10.1089/omi.2011.0118>  
PMID:[22455463](https://pubmed.ncbi.nlm.nih.gov/22455463/)
  17. Eide PW, Bruun J, Lothe RA, Sveen A. CMScaller: an R package for consensus molecular subtyping of colorectal cancer pre-clinical models. *Sci Rep.* 2017; 7:16618.  
<https://doi.org/10.1038/s41598-017-16747-x>  
PMID:[29192179](https://pubmed.ncbi.nlm.nih.gov/29192179/)
  18. Newman AM, Liu CL, Green MR, Gentles AJ, Feng W, Xu Y, Hoang CD, Diehn M, Alizadeh AA. Robust enumeration of cell subsets from tissue expression profiles. *Nat Methods.* 2015; 12:453–7.  
<https://doi.org/10.1038/nmeth.3337>  
PMID:[25822800](https://pubmed.ncbi.nlm.nih.gov/25822800/)
  19. Mayakonda A, Lin DC, Assenov Y, Plass C, Koeffler HP. Maftools: efficient and comprehensive analysis of somatic variants in cancer. *Genome Res.* 2018; 28:1747–56.  
<https://doi.org/10.1101/gr.239244.118>  
PMID:[30341162](https://pubmed.ncbi.nlm.nih.gov/30341162/)
  20. Maeser D, Gruener RF, Huang RS. oncoPredict: an R package for predicting *in vivo* or cancer patient drug response and biomarkers from cell line screening data. *Brief Bioinform.* 2021; 22:bbab260.  
<https://doi.org/10.1093/bib/bbab260> PMID:[34260682](https://pubmed.ncbi.nlm.nih.gov/34260682/)
  21. Herrera M, Berral-González A, López-Cade I, Galindo-Pumariño C, Bueno-Fortes S, Martín-Merino M, Carrato A, Ocaña A, De La Pinta C, López-Alfonso A, Peña C, García-Barberán V, De Las Rivas J. Cancer-associated fibroblast-derived gene signatures determine prognosis in colon cancer patients. *Mol Cancer.* 2021; 20:73.  
<https://doi.org/10.1186/s12943-021-01367-x>  
PMID:[33926453](https://pubmed.ncbi.nlm.nih.gov/33926453/)
  22. Zhou R, Zhang J, Zeng D, Sun H, Rong X, Shi M, Bin J, Liao Y, Liao W. Immune cell infiltration as a biomarker for the diagnosis and prognosis of stage I–III colon cancer. *Cancer Immunol Immunother.* 2019; 68:433–42.  
<https://doi.org/10.1007/s00262-018-2289-7>  
PMID:[30564892](https://pubmed.ncbi.nlm.nih.gov/30564892/)
  23. Wang Z, Song J, Azami NL, Sun M. Identification of a Novel Immune Landscape Signature for Predicting Prognosis and Response of Colon Cancer to Immunotherapy. *Front Immunol.* 2022; 13:802665.  
<https://doi.org/10.3389/fimmu.2022.802665>  
PMID:[35572595](https://pubmed.ncbi.nlm.nih.gov/35572595/)
  24. Guo JN, Chen D, Deng SH, Huang JR, Song JX, Li XY, Cui BB, Liu YL. Identification and quantification of immune infiltration landscape on therapy and prognosis in left- and right-sided colon cancer. *Cancer Immunol Immunother.* 2022; 71:1313–30.  
<https://doi.org/10.1007/s00262-021-03076-2>  
PMID:[34657172](https://pubmed.ncbi.nlm.nih.gov/34657172/)
  25. Duraes LC, Steele SR, Valente MA, Lavryk OA, Connelly TM, Kessler H. Right colon, left colon, and rectal cancer

- have different oncologic and quality of life outcomes. *Int J Colorectal Dis.* 2022; 37:939–48.  
<https://doi.org/10.1007/s00384-022-04121-x>  
PMID:[35312830](https://pubmed.ncbi.nlm.nih.gov/35312830/)
26. Shen H, Yang J, Huang Q, Jiang MJ, Tan YN, Fu JF, Zhu LZ, Fang XF, Yuan Y. Different treatment strategies and molecular features between right-sided and left-sided colon cancers. *World J Gastroenterol.* 2015; 21:6470–8.  
<https://doi.org/10.3748/wjg.v21.i21.6470>  
PMID:[26074686](https://pubmed.ncbi.nlm.nih.gov/26074686/)
27. Qiu Y, Li H, Zhang Q, Qiao X, Wu J. Ferroptosis-Related Long Noncoding RNAs as Prognostic Marker for Colon Adenocarcinoma. *Appl Bionics Biomech.* 2022; 2022:5220368.  
<https://doi.org/10.1155/2022/5220368>  
PMID:[35432591](https://pubmed.ncbi.nlm.nih.gov/35432591/)
28. Abhari RE, Thomson B, Yang L, Millwood I, Guo Y, Yang X, Lv J, Avery D, Pei P, Wen P, Yu C, Chen Y, Chen J, et al. External validation of models for predicting risk of colorectal cancer using the China Kadoorie Biobank. *BMC Med.* 2022; 20:302.  
<https://doi.org/10.1186/s12916-022-02488-w>  
PMID:[36071519](https://pubmed.ncbi.nlm.nih.gov/36071519/)
29. Astrosini C, Roefzaad C, Dai YY, Dieckgraefe BK, Jöns T, Kemmner W. REG1A expression is a prognostic marker in colorectal cancer and associated with peritoneal carcinomatosis. *Int J Cancer.* 2008; 123:409–13.  
<https://doi.org/10.1002/ijc.23466>  
PMID:[18452172](https://pubmed.ncbi.nlm.nih.gov/18452172/)
30. Guan Y, Zhu X, Liang J, Wei M, Huang S, Pan X. Upregulation of HSPA1A/HSPA1B/HSPA7 and Downregulation of HSPA9 Were Related to Poor Survival in Colon Cancer. *Front Oncol.* 2021; 11:749673.  
<https://doi.org/10.3389/fonc.2021.749673>  
PMID:[34765552](https://pubmed.ncbi.nlm.nih.gov/34765552/)
31. Wallin U, Glimelius B, Jirström K, Darmanis S, Nong RY, Pontén F, Johansson C, Pählman L, Birgisson H. Growth differentiation factor 15: a prognostic marker for recurrence in colorectal cancer. *Br J Cancer.* 2011; 104:1619–27.  
<https://doi.org/10.1038/bjc.2011.112>  
PMID:[21468045](https://pubmed.ncbi.nlm.nih.gov/21468045/)
32. Lau TP, Roslani AC, Lian LH, Chai HC, Lee PC, Hilmi I, Goh KL, Chua KH. Pair-wise comparison analysis of differential expression of mRNAs in early and advanced stage primary colorectal adenocarcinomas. *BMJ Open.* 2014; 4:e004930.  
<https://doi.org/10.1136/bmjopen-2014-004930>  
PMID:[25107436](https://pubmed.ncbi.nlm.nih.gov/25107436/)
33. Wu YF, Wang CY, Tang WC, Lee YC, Ta HD, Lin LC, Pan SR, Ni YC, Anuraga G, Lee KH. Expression Profile and Prognostic Value of Wnt Signaling Pathway Molecules in Colorectal Cancer. *Biomedicines.* 2021; 9:1331.  
<https://doi.org/10.3390/biomedicines9101331>  
PMID:[34680448](https://pubmed.ncbi.nlm.nih.gov/34680448/)



SUPPLEMENTARY MATERIALS

Supplementary Figures

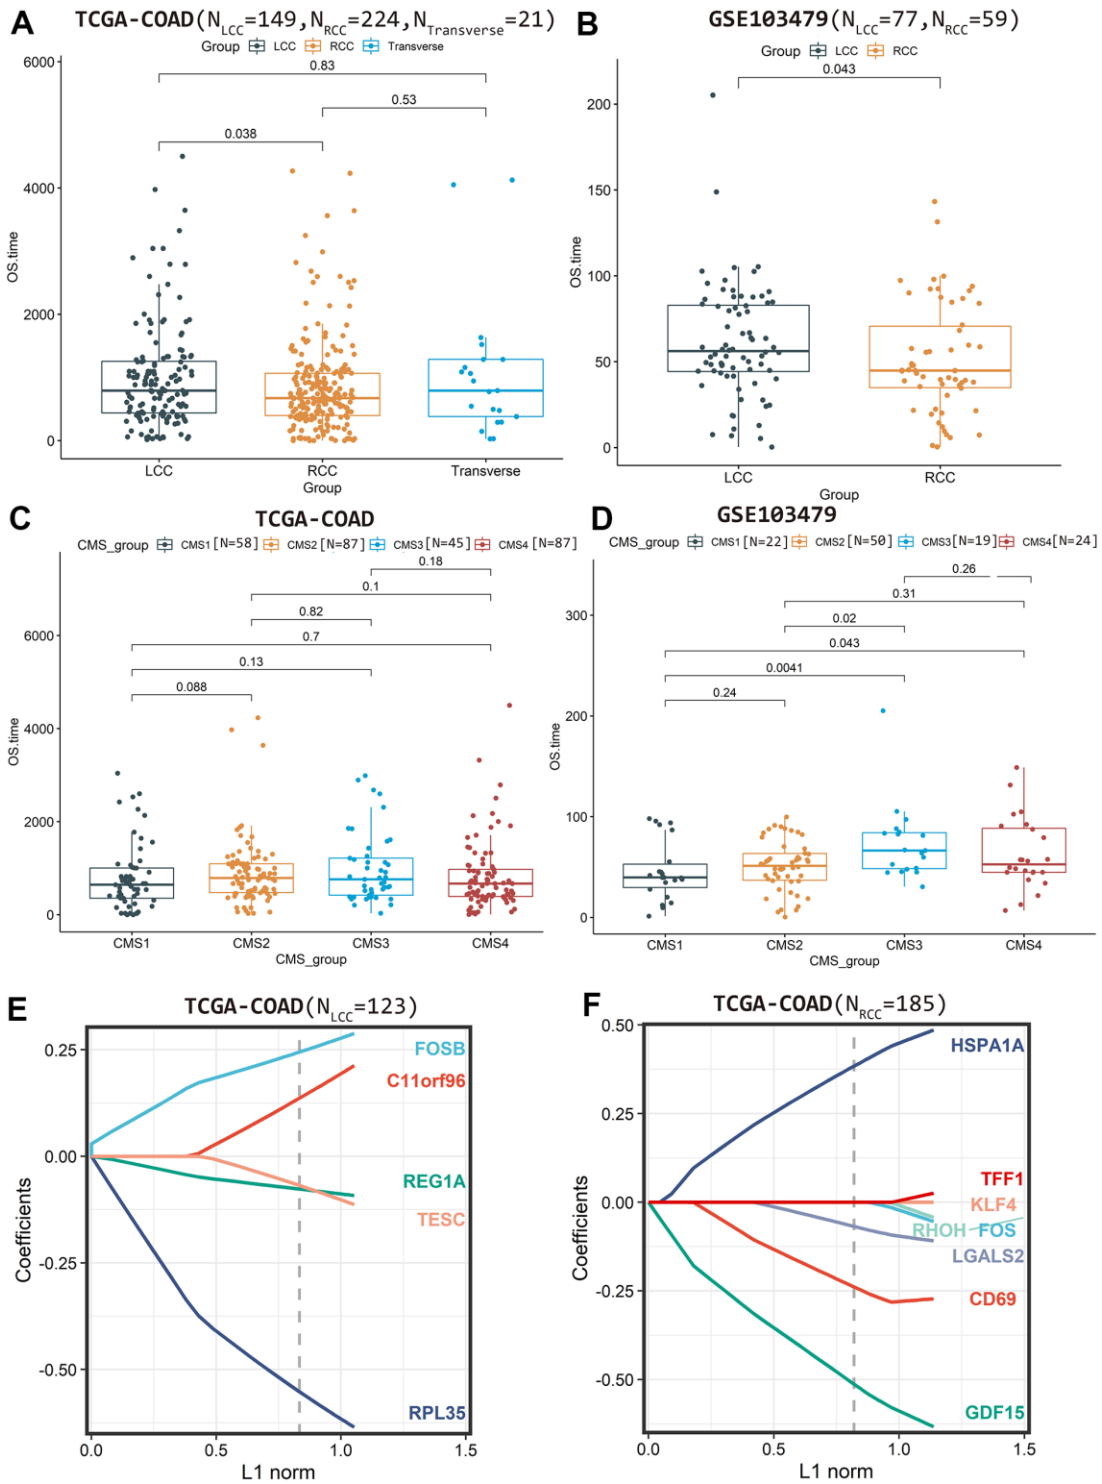

**Supplementary Figure 1.** Survival time comparison between patients with LCC and RCC, based on (A) TCGA-COAD cohort, (B) GSE103479 cohort. Survival time comparison between patients in CMS subtypes, based on (C) TCGA-COAD cohort, (D) GSE103479 cohort. Candidate prognostic signature coefficients for (E) LCC patients, (F) RCC patients based on TCGA-COAD cohort.

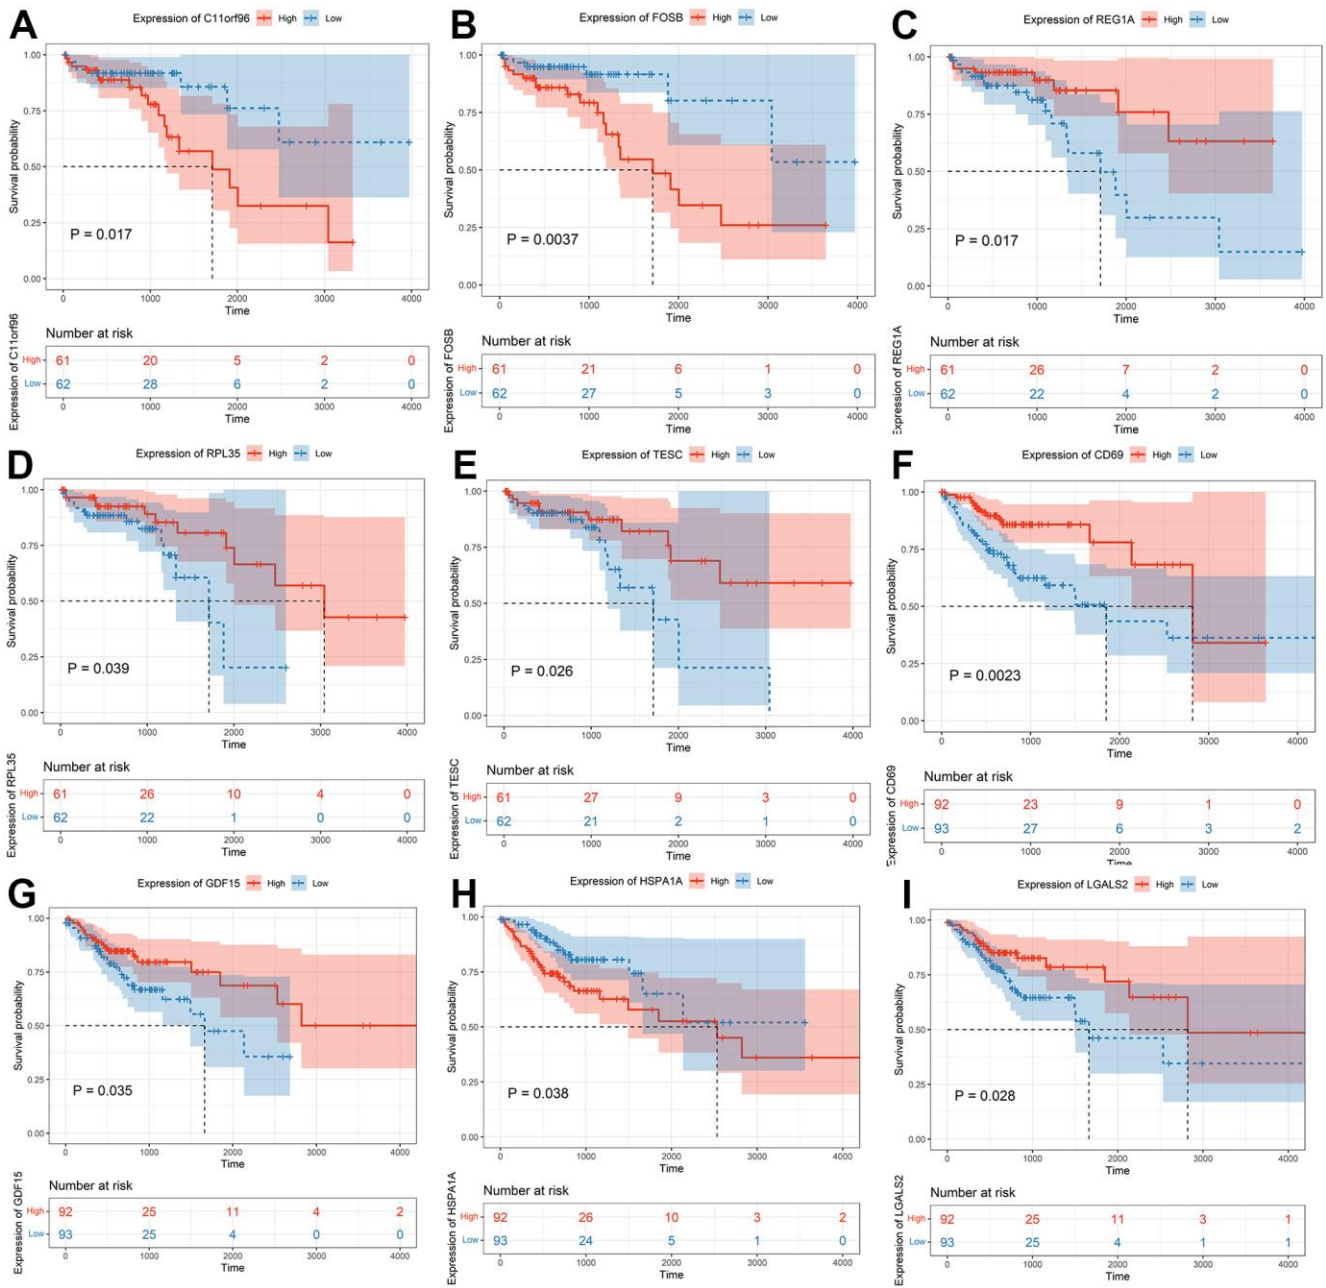

**Supplementary Figure 2.** The relationship between prognostic markers' expression with patients' OS, including (A) C11orf96, (B) FOSB, (C) REG1A, (D) RPL35, (E) TESC, (F) CD69, (G) GDF15, (H) HSPA1A, (I) LGALS2.

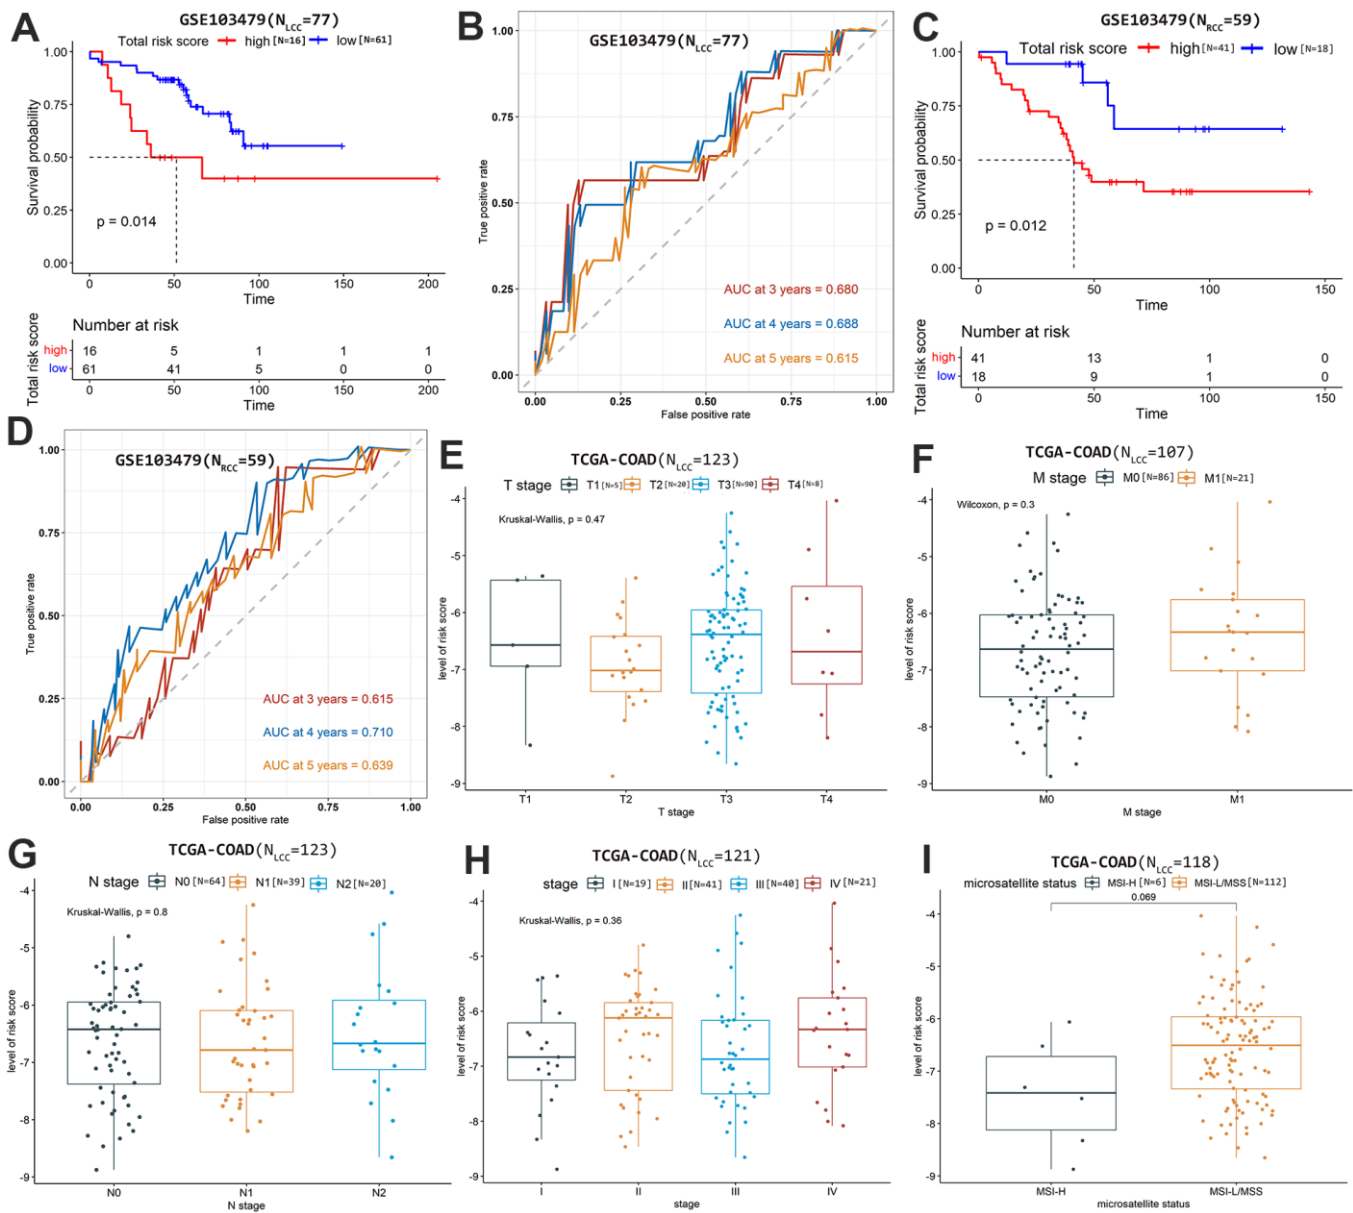

**Supplementary Figure 3. Validation the identified prognostic markers based on GSE103479.** (A) A Kaplan–Meier curve shows that low-risk score LCC patients had better OS than high-risk score LCC patients. (B) The AUCs of the prognostic model for LCC patients. (C) A Kaplan–Meier curve shows that low-risk score RCC patients had better OS than high-risk score RCC patients. (D) The AUCs of the prognostic model for RCC patients. The relationship between LCC patients’ risk scores and clinical features, (E) T stage, (F) M stage, (G) N stage, (H) Advanced pathological stages, (I) Microsatellite status, based on TCGA-COAD cohort.

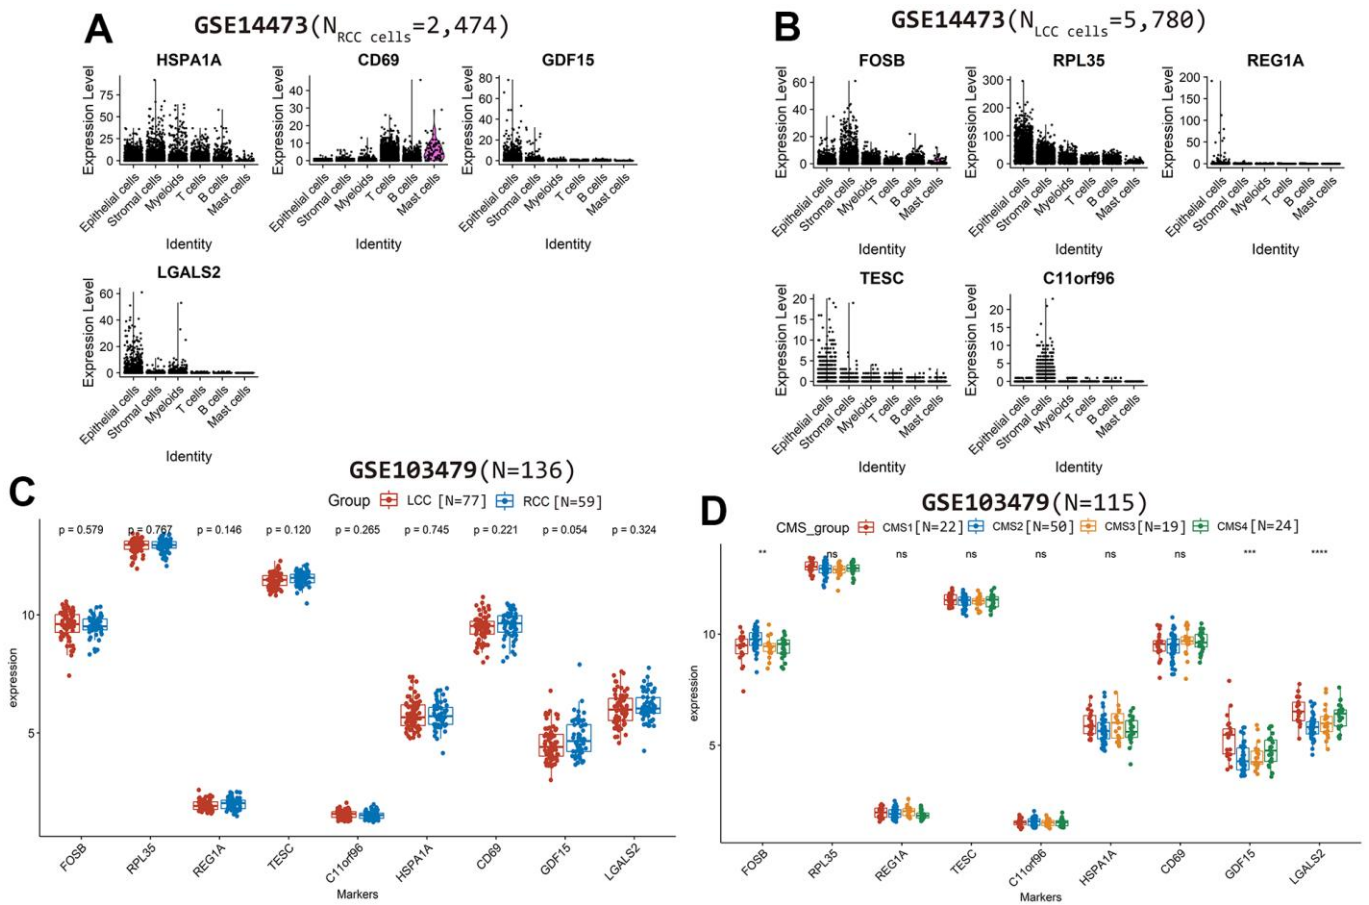

**Supplementary Figure 4.** The expression level of prognostic markers in each cell types based on scRNA-seq dataset GSE14473, such as (A) RCC cells and (B) LCC cells. (C) Comparing the expression differences of markers between LCC and RCC samples based on TCGA-COAD cohort. (D) Comparing the expression differences of markers among CMS subtypes based on TCGA-COAD cohort.

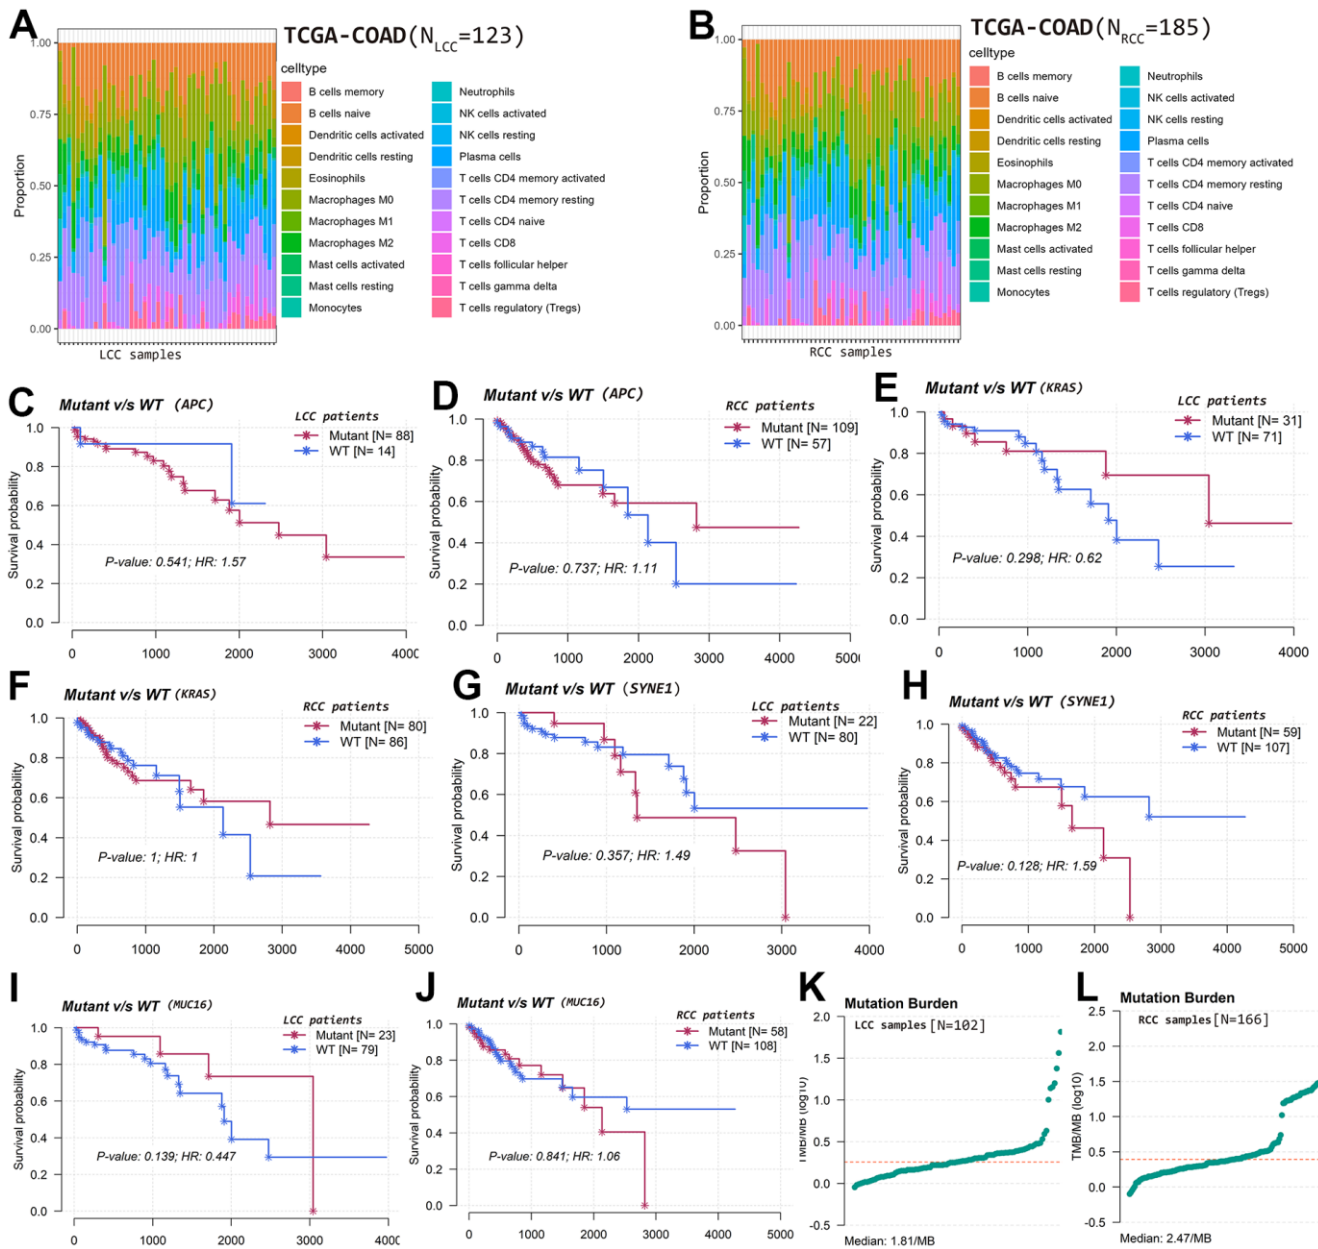

**Supplementary Figure 5. The mutation profiles and relationships between the status of top mutated genes and OS.** (A) LCC sample mutation profiles. (B) RCC sample mutation profiles. (C) Relationships between *APC* mutation status and OS in LCC patients. (D) Relationships between *APC* mutation status and OS in RCC patients. (E) Relationships between *KRAS* mutation status and OS in LCC patients. (F) Relationships between *KRAS* mutation status and OS in RCC patients. (G) Relationships between *SYNE1* mutation status and OS in LCC patients. (H) Relationships between *SYNE1* mutation status and OS in RCC patients. (I) Relationships between *MUC16* mutation status and OS in LCC patients. (J) Relationships between *MUC16* mutation status and OS in RCC patients. (K) The median TMB value in LCC patients. (L) The median TMB value in RCC patients.



## Supplementary Tables

Please browse Full Text version to see the data of Supplementary Table 2.

**Supplementary Table 1. The detailed information of GSE103479.**

|                   | LCC<br>(N=76)     | RCC<br>(N=58)     | Overall<br>(N=134) |
|-------------------|-------------------|-------------------|--------------------|
| <b>Gender</b>     |                   |                   |                    |
| Female            | 30 (39.5%)        | 31 (53.4%)        | 61 (45.5%)         |
| Male              | 46 (60.5%)        | 27 (46.6%)        | 73 (54.5%)         |
| <b>Age</b>        |                   |                   |                    |
| <=60              | 19 (25.0%)        | 4 (6.9%)          | 23 (17.2%)         |
| >60               | 57 (75.0%)        | 54 (93.1%)        | 111 (82.8%)        |
| <b>CMS</b>        |                   |                   |                    |
| CMS1              | 6 (7.9%)          | 16 (27.6%)        | 22 (16.4%)         |
| CMS2              | 33 (43.4%)        | 17 (29.3%)        | 50 (37.3%)         |
| CMS3              | 13 (17.1%)        | 6 (10.3%)         | 19 (14.2%)         |
| CMS4              | 14 (18.4%)        | 10 (17.2%)        | 24 (17.9%)         |
| Unknown           | 10 (13.2%)        | 9 (15.5%)         | 19 (14.2%)         |
| <b>stage</b>      |                   |                   |                    |
| II                | 41 (53.9%)        | 28 (48.3%)        | 69 (51.5%)         |
| III               | 35 (46.1%)        | 30 (51.7%)        | 65 (48.5%)         |
| <b>OS</b>         |                   |                   |                    |
| Alive             | 51 (67.1%)        | 31 (53.4%)        | 82 (61.2%)         |
| Death             | 25 (32.9%)        | 27 (46.6%)        | 52 (38.8%)         |
| <b>OS.time</b>    |                   |                   |                    |
| Mean (SD)         | 60.7 (32.8)       | 51.1 (32.1)       | 56.6 (32.7)        |
| Median [Min, Max] | 56.1 [0.329, 205] | 44.8 [0.362, 143] | 51.2 [0.329, 205]  |
| <b>T</b>          |                   |                   |                    |
| T1                | 1 (1.3%)          | 0 (0%)            | 1 (0.7%)           |
| T2                | 4 (5.3%)          | 2 (3.4%)          | 6 (4.5%)           |
| T3                | 54 (71.1%)        | 38 (65.5%)        | 92 (68.7%)         |
| T4                | 17 (22.4%)        | 18 (31.0%)        | 35 (26.1%)         |
| <b>M</b>          |                   |                   |                    |
| M                 | 38 (50.0%)        | 27 (46.6%)        | 65 (48.5%)         |
| M0                | 38 (50.0%)        | 31 (53.4%)        | 69 (51.5%)         |
| <b>N</b>          |                   |                   |                    |
| N0                | 41 (53.9%)        | 28 (48.3%)        | 69 (51.5%)         |
| N1                | 23 (30.3%)        | 24 (41.4%)        | 47 (35.1%)         |
| N2                | 12 (15.8%)        | 6 (10.3%)         | 18 (13.4%)         |

Supplementary Table 2. The detailed information of DEGs between RCC cells and LCC cell in each cell type.

**Supplementary Table 3. The detailed information of the 37 prognostic genes.**

| Type     | GeneName | P-value |
|----------|----------|---------|
| RCC      | HSPA1A   | 0.038   |
|          | ZFP36    | 0.011   |
|          | FOS      | 0.031   |
|          | BTG1     | 0.015   |
|          | CD69     | 0.0023  |
|          | SARAF    | 0.042   |
|          | RHOH     | 0.0068  |
|          | IGKV3-20 | 0.024   |
|          | IGLC2    | 0.012   |
|          | IGLV3-1  | 0.018   |
|          | IGLC3    | 0.036   |
|          | KLF4     | 0.009   |
|          | TFF1     | 0.01    |
|          | GDF15    | 0.035   |
|          | LGALS2   | 0.028   |
|          | TNFSF11  | 0.013   |
|          | CXCL2    | 0.033   |
|          | PRKAR2B  | 0.038   |
|          | FSTL3    | 0.03    |
|          | GSTM1    | 0.038   |
| GADD45B  | 0.039    |         |
| LCC      | DUSP1    | 0.024   |
|          | FOSB     | 0.0037  |
|          | SLC2A3   | 0.0091  |
|          | CLEC2B   | 0.025   |
|          | RPL35    | 0.039   |
|          | REG1A    | 0.017   |
|          | TESC     | 0.026   |
|          | MUC2     | 0.023   |
|          | UCP2     | 0.036   |
|          | BCL3     | 0.046   |
| C11orf96 | 0.017    |         |

**Supplementary Table 4. The detailed information of the 44 sensitive drugs.**

| <b>DrugName</b>              | <b>Average IC50 of LCC</b> | <b>Average IC50 of RCC</b> |
|------------------------------|----------------------------|----------------------------|
| AZD7762_1022                 | 1.1204019813473            | 1.14668122516778           |
| AZD8055_1059                 | 0.819746194430271          | 0.817151413765119          |
| BI-2536_1086                 | 1.43477406540067           | 1.44516285070571           |
| BMS-754807_2171              | 2.18563326304696           | 2.0995544101959            |
| Bortezomib_1191              | 0.0079553655585555         | 0.00795034351693453        |
| Buparlisib_1873              | 2.64067623292989           | 2.71915407159633           |
| Camptothecin_1003            | 0.106941939328332          | 0.126685792093699          |
| CDK9_5038_1709               | 0.101784844963055          | 0.110910831372088          |
| CDK9_5576_1708               | 0.697126165684043          | 0.747710358035258          |
| Dactinomycin_1811            | 0.0914565247765287         | 0.0947628168703208         |
| Dactinomycin_1911            | 0.00930230788904291        | 0.00979743548734258        |
| Dactolisib_1057              | 0.208373502951644          | 0.217767507782637          |
| Daporinad_1248               | 0.0159589729625909         | 0.0152438928452886         |
| Dihydrorotenone_1827         | 2.67874699895989           | 2.58263284297451           |
| Dinaciclib_1180              | 0.0622924469820657         | 0.0643635837037069         |
| Docetaxel_1007               | 0.0114575094281596         | 0.0123631384452993         |
| Docetaxel_1819               | 0.115262401841707          | 0.153395306777572          |
| Eg5_9814_1712                | 0.0514518409829225         | 0.0578239198162486         |
| Epirubicin_1511              | 0.39873780453285           | 0.443820929049132          |
| Foretinib_2040               | 2.8036548807378            | 2.8351526305029            |
| Gemcitabine_1190             | 0.670396146804438          | 0.885694591519111          |
| GNE-317_1926                 | 1.7357221893917            | 1.78365491687438           |
| Luminespib_1559              | 0.114542509427635          | 0.124908217906364          |
| MG-132_1862                  | 0.199904631860733          | 0.200702148062894          |
| Mitoxantrone_1810            | 2.35472957002234           | 2.78548918493597           |
| MK-1775_1179                 | 1.84196464279701           | 1.88729184406175           |
| Obatoclox Mesylate_1068      | 4.21859659918443           | 4.25533904583997           |
| Paclitaxel_1080              | 0.0699157080248199         | 0.0776069245152012         |
| PD0325901_1060               | 1.78951162837727           | 1.81467908936507           |
| Pevonedistat_1529            | 2.2223919772503            | 2.58925495765451           |
| Pictilisib_1058              | 4.23695684306298           | 4.34822145911636           |
| Podophyllotoxin bromide_1825 | 0.534256310699056          | 0.584762508793234          |
| Rapamycin_1084               | 0.124666540178059          | 0.128443408563328          |
| Sabutoclox_1849              | 0.715483989210096          | 0.735267805242988          |
| Sepantronium bromide_1941    | 0.0141875929157305         | 0.0148052970774564         |
| Staurosporine_1034           | 0.0530226514569955         | 0.0570266509673851         |
| Telomerase Inhibitor IX_1930 | 1.74804204176677           | 1.80528995955417           |
| Teniposide_1809              | 1.88461723681019           | 2.23104661366957           |
| Topotecan_1808               | 1.23814143201278           | 1.36328885227713           |
| Trametinib_1372              | 2.01427331557814           | 2.10670533866479           |
| Vinblastine_1004             | 0.0258534037328264         | 0.0307996754635948         |
| Vincristine_1818             | 0.19105207223191           | 0.240791887001131          |
| Vinorelbine_2048             | 0.0490856376646081         | 0.0567394338636524         |
| Vorinostat_1012              | 4.29191225842706           | 4.32462213402817           |
