# Supplementary material for: Comparative analyses of the prognosis, tumor immune microenvironment, and drug treatment response between left-sided and right-sided colon cancer by integrating scRNA-seq and bulk RNA-seq data
Source: publisher site journal article supplement (doi:10.18632/aging.204894), 2023-07-21
Supplement: Supplementary file [file aging-v15i14-204894-supplementary-material-SD1.pdf]

**SUPPLEMENTARY FIGURES**

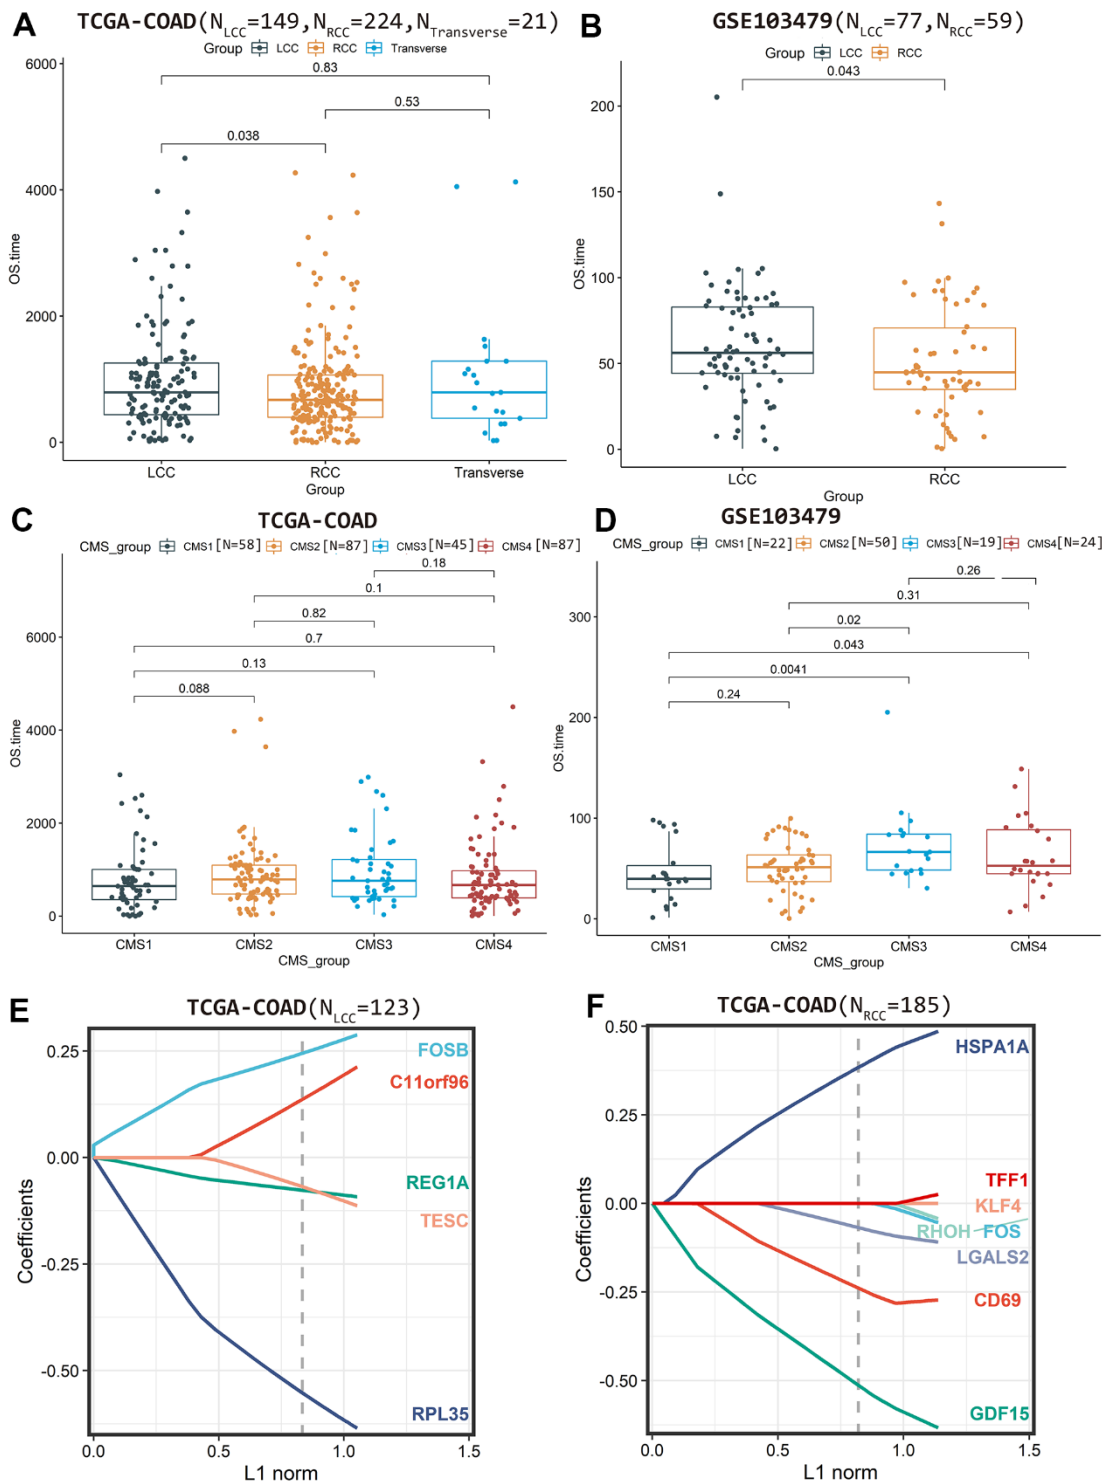

**Supplementary Figure 1.** Survival time comparison between patients with LCC and RCC, based on (A) TCGA-COAD cohort, (B) GSE103479 cohort. Survival time comparison between patients in CMS subtypes, based on (C) TCGA-COAD cohort, (D) GSE103479 cohort. Candidate prognostic signature coefficients for (E) LCC patients, (F) RCC patients based on TCGA-COAD cohort.

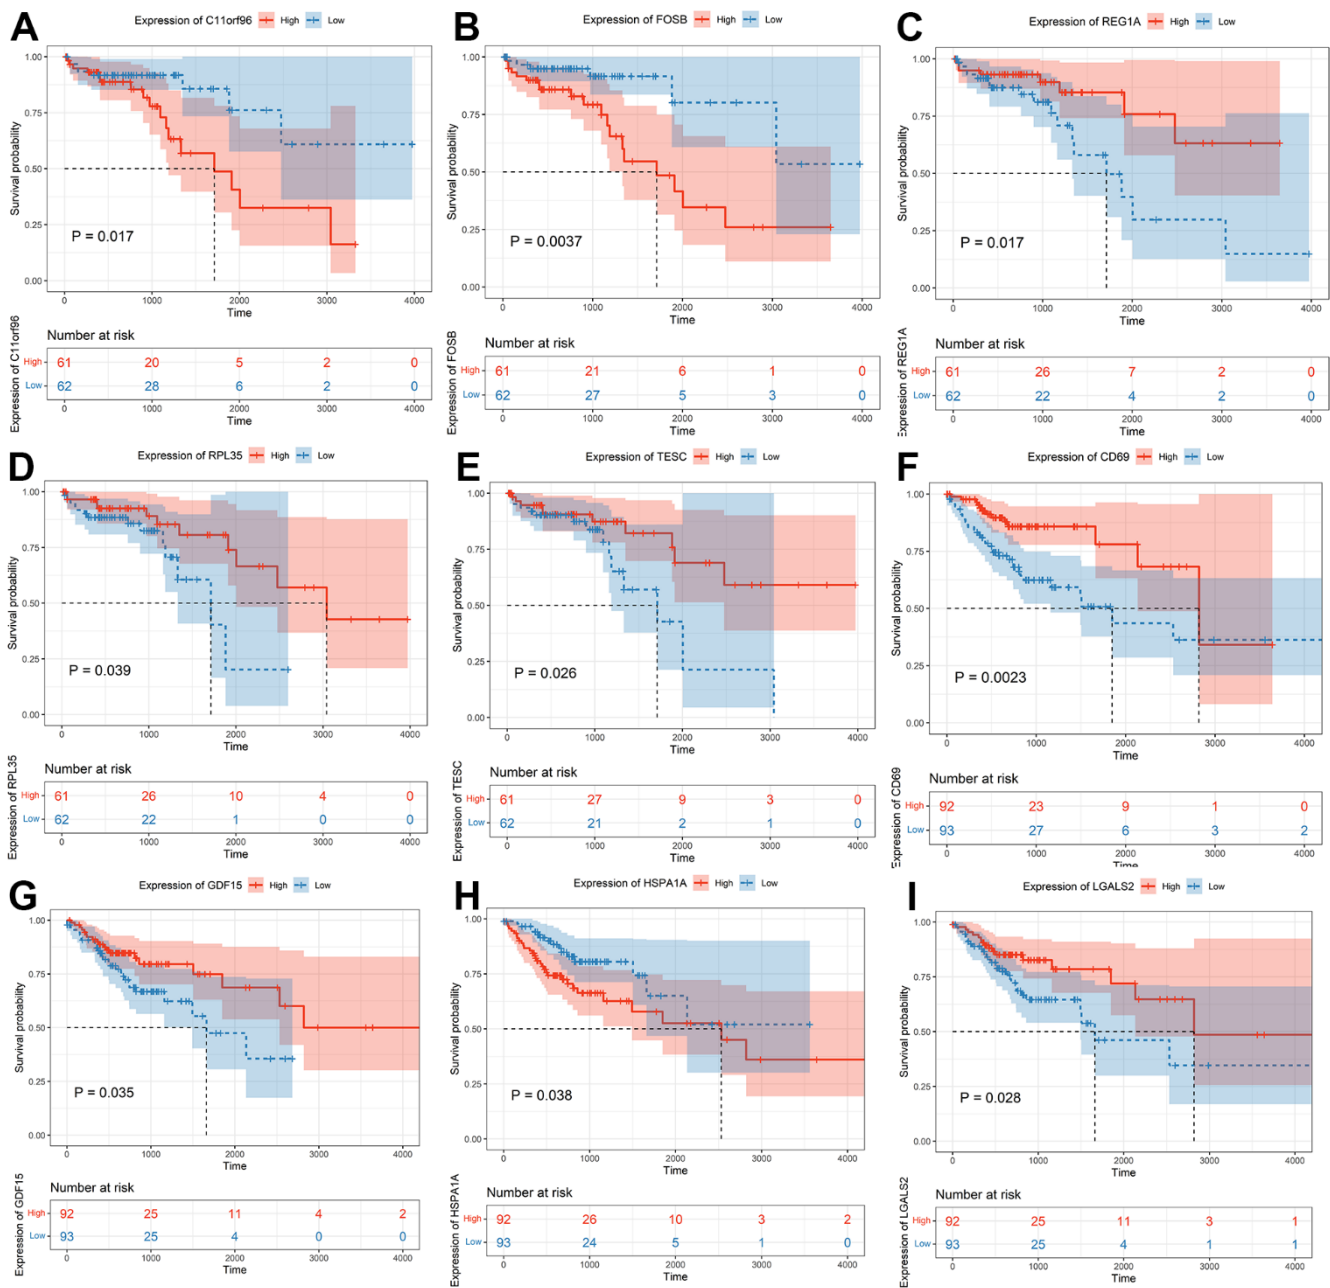

**Supplementary Figure 2.** The relationship between prognostic markers' expression with patients' OS, including (A) C11orf96, (B) FOSB, (C) REG1A, (D) RPL35, (E) TESC, (F) CD69, (G) GDF15, (H) HSPA1A, (I) LGALS2.

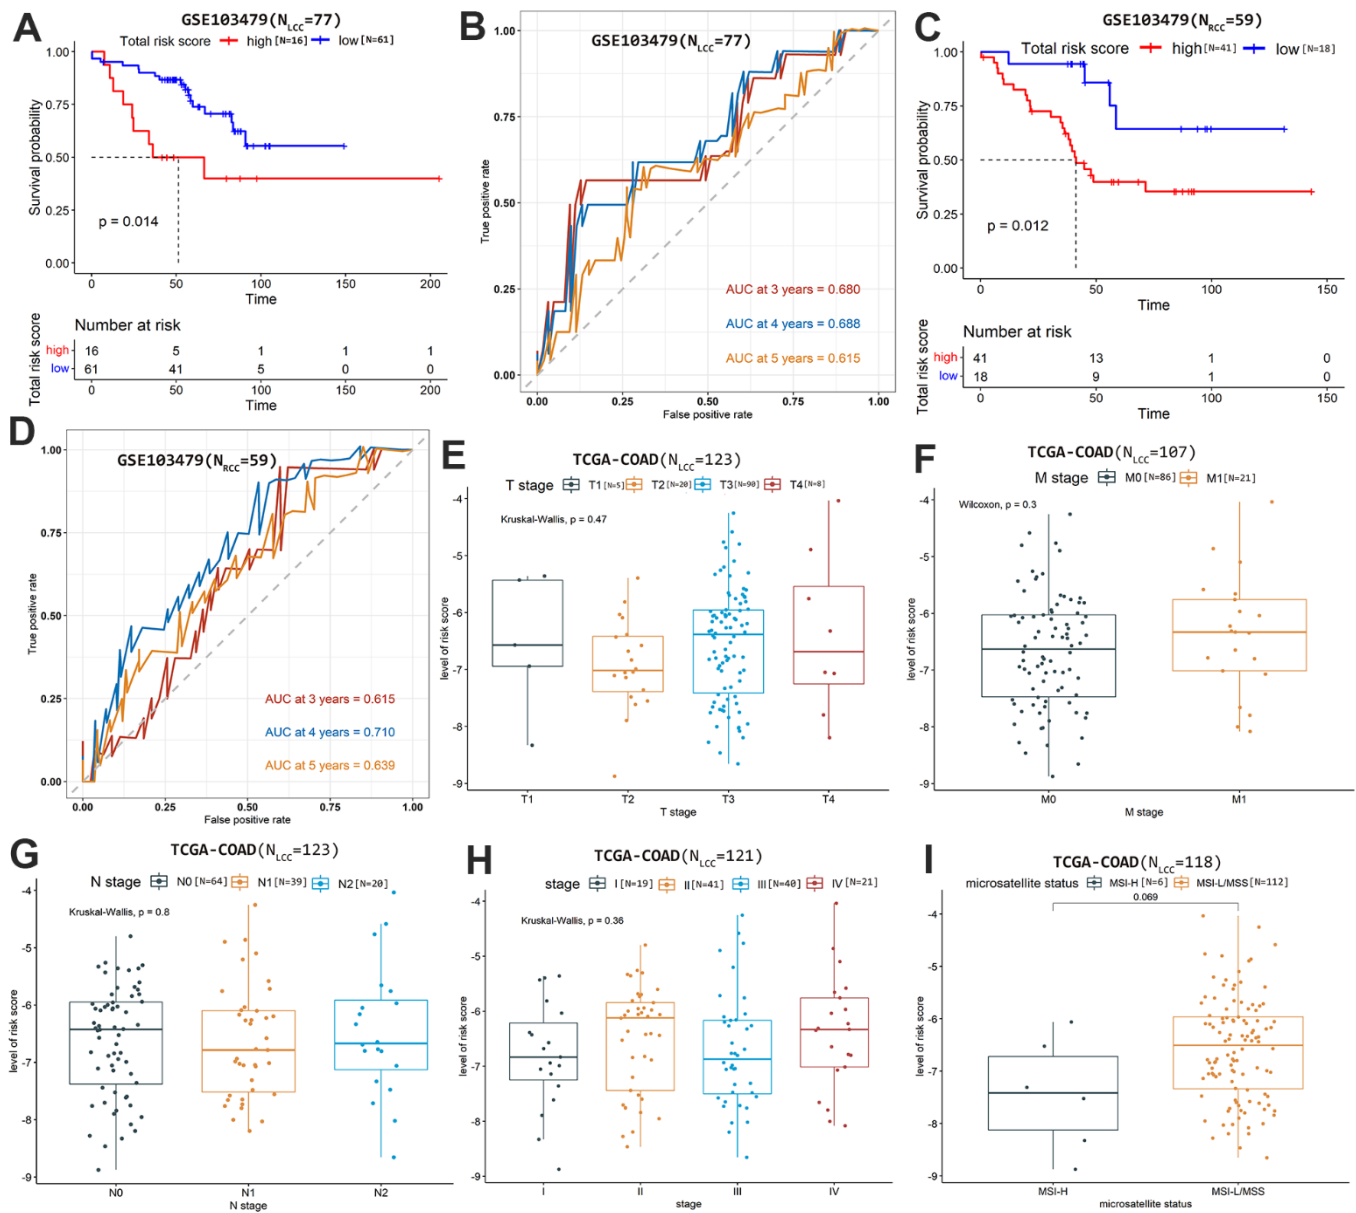

**Supplementary Figure 3. Validation the identified prognostic markers based on GSE103479.** (A) A Kaplan–Meier curve shows that low-risk score LCC patients had better OS than high-risk score LCC patients. (B) The AUCs of the prognostic model for LCC patients. (C) A Kaplan–Meier curve shows that low-risk score RCC patients had better OS than high-risk score RCC patients. (D) The AUCs of the prognostic model for RCC patients. The relationship between LCC patients’ risk scores and clinical features, (E) T stage, (F) M stage, (G) N stage, (H) Advanced pathological stages, (I) Microsatellite status, based on TCGA-COAD cohort.

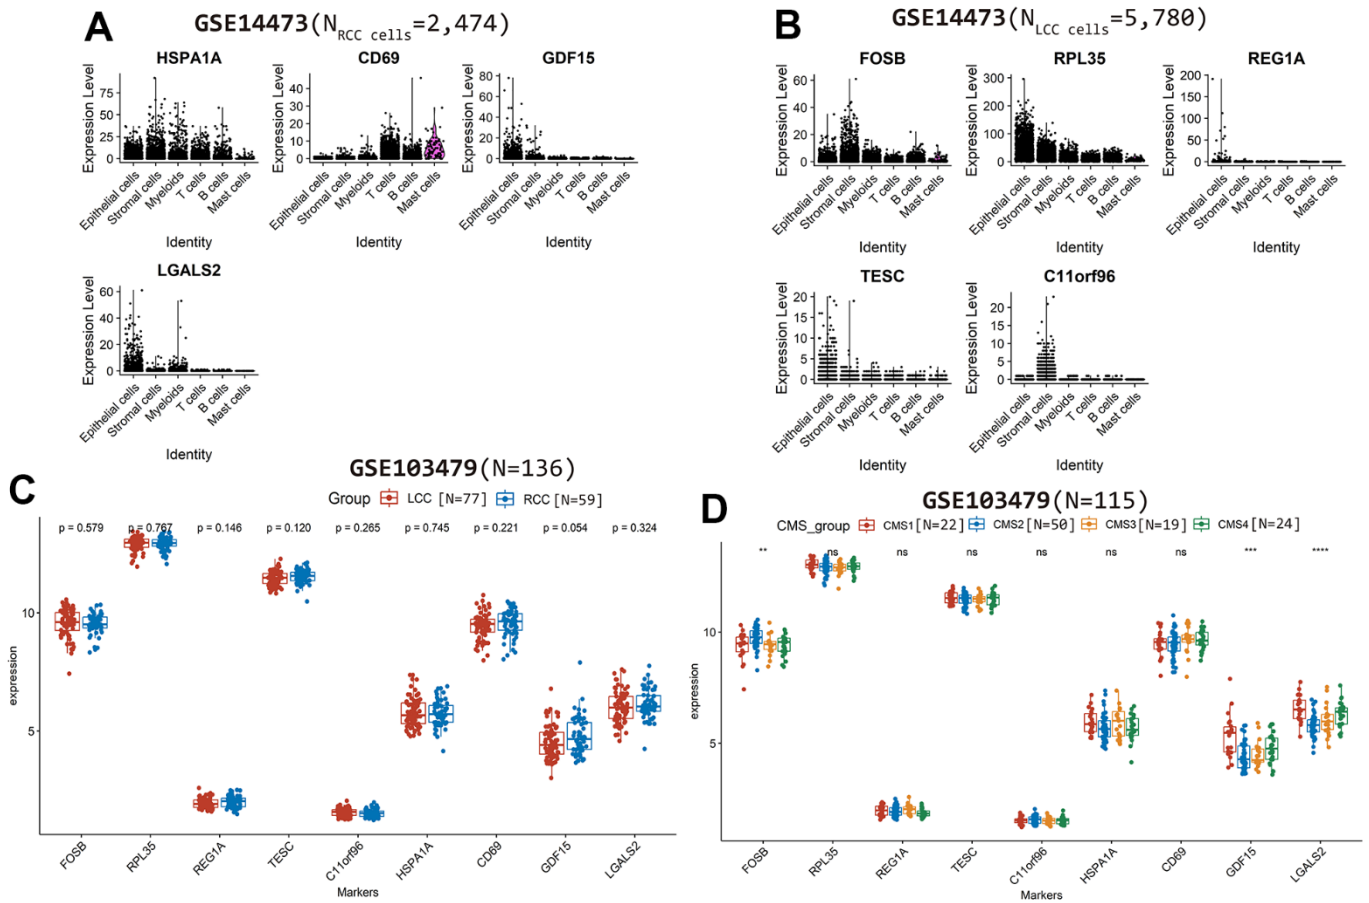

**Supplementary Figure 4.** The expression level of prognostic markers in each cell types based on scRNA-seq dataset GSE14473, such as (A) RCC cells and (B) LCC cells. (C) Comparing the expression differences of markers between LCC and RCC samples based on TCGA-COAD cohort. (D) Comparing the expression differences of markers among CMS subtypes based on TCGA-COAD cohort.

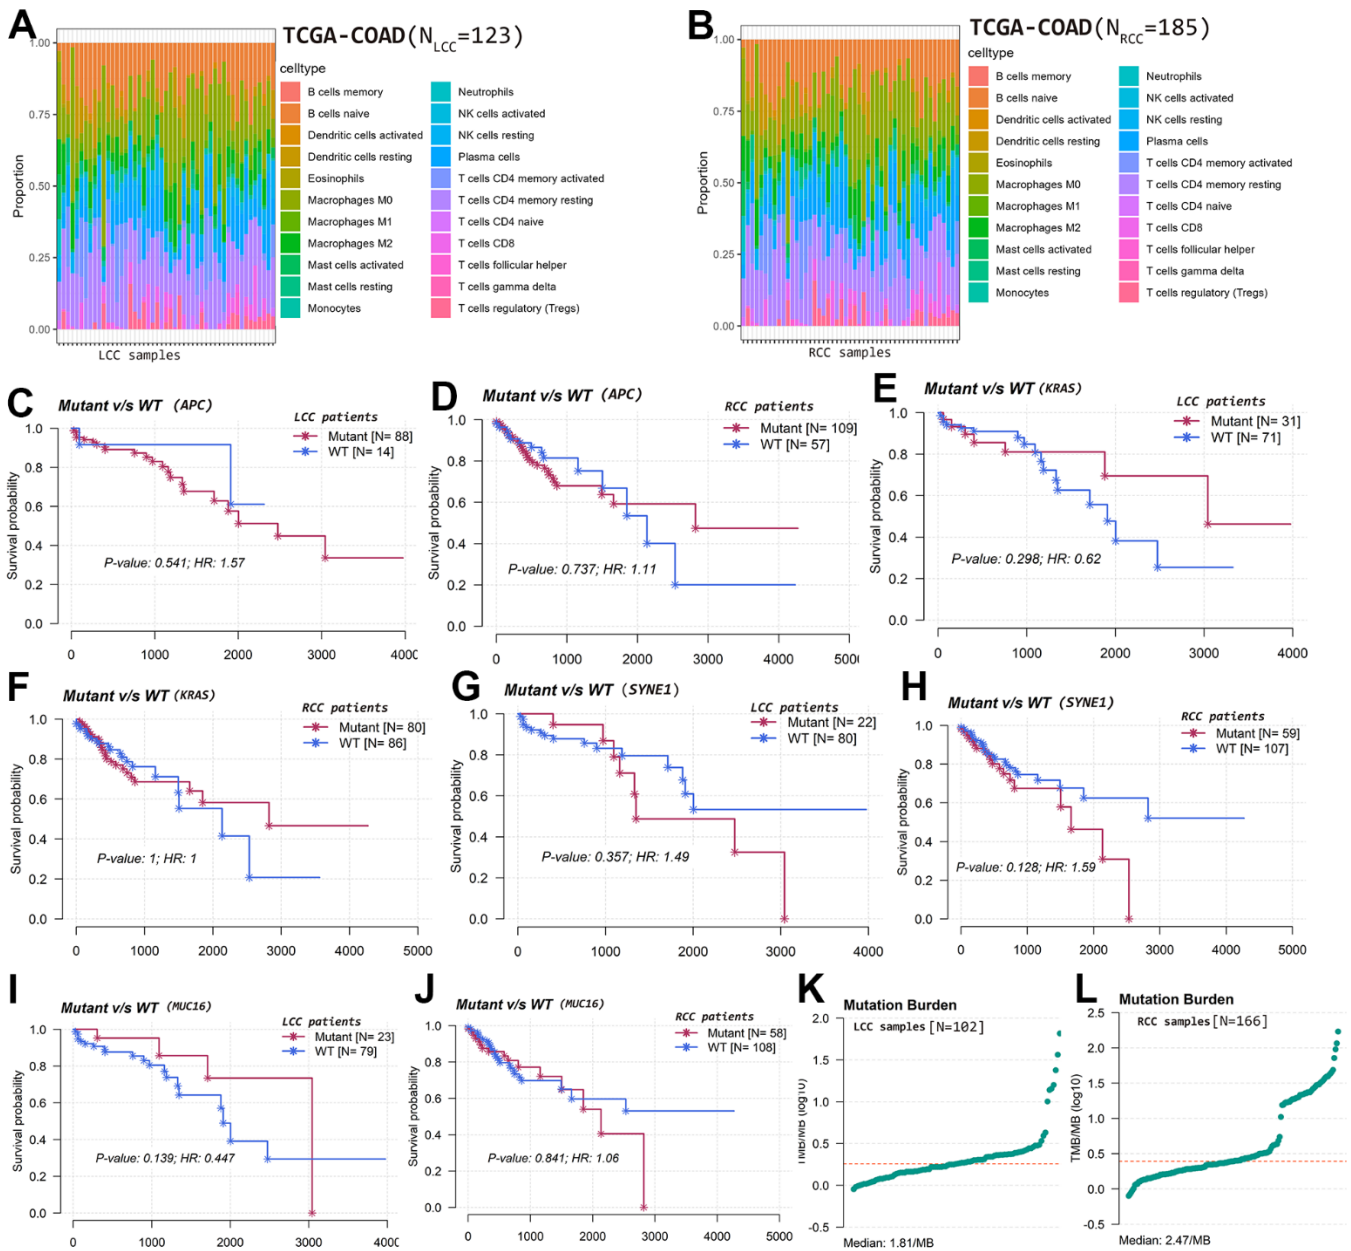

**Supplementary Figure 5. The mutation profiles and relationships between the status of top mutated genes and OS.** (A) LCC sample mutation profiles. (B) RCC sample mutation profiles. (C) Relationships between *APC* mutation status and OS in LCC patients. (D) Relationships between *APC* mutation status and OS in RCC patients. (E) Relationships between *KRAS* mutation status and OS in LCC patients. (F) Relationships between *KRAS* mutation status and OS in RCC patients. (G) Relationships between *SYNE1* mutation status and OS in LCC patients. (H) Relationships between *SYNE1* mutation status and OS in RCC patients. (I) Relationships between *MUC16* mutation status and OS in LCC patients. (J) Relationships between *MUC16* mutation status and OS in RCC patients. (K) The median TMB value in LCC patients. (L) The median TMB value in RCC patients.
