# Supplementary material for: Comparative analyses of the prognosis, tumor immune microenvironment, and drug treatment response between left-sided and right-sided colon cancer by integrating scRNA-seq and bulk RNA-seq data
Source: Aging (Albany NY). 2023 Jul 24;15(14):7098–123. doi: 10.18632/aging.204894 (PMC10415577; doi:10.18632/aging.204894)
Supplement: Supplementary Table 2 [file aging-15-204894-s003.xlsx]

## Sheet: T cells
Supplementary Table 2. The detailed information of DEGs between RCC cells and LCC cell in each cell type.
GeneName	myAUC	avg_diff	power	avg_log2FC	pct.1	pct.2
HSP90AA1	0.825	1.32499	0.65	1.91156	0.938	0.621
HSPA1A	0.824	2.27816	0.648	3.28668	0.752	0.154
HSPA1B	0.82	1.98343	0.64	2.86149	0.745	0.137
DNAJB1	0.814	1.5015	0.628	2.16621	0.896	0.515
HSPA8	0.78	0.955257	0.56	1.37814	0.944	0.748
JUN	0.778	1.24682	0.556	1.79878	0.894	0.561
DNAJA1	0.759	1.1488	0.518	1.65737	0.754	0.348
HSP90AB1	0.732	0.839872	0.464	1.21168	0.866	0.595
UBC	0.729	0.767628	0.458	1.10745	0.94	0.723
HSPH1	0.727	1.11078	0.454	1.60251	0.611	0.186
HSPE1	0.727	1.10834	0.454	1.599	0.727	0.362
UBB	0.715	0.72476	0.43	1.04561	0.866	0.613
CACYBP	0.712	1.03562	0.424	1.49408	0.582	0.184
HSPD1	0.692	0.883251	0.384	1.27426	0.632	0.289
RPS29	0.309	-0.58082	0.382	-0.837947	0.85	0.904
PPP1R15A	0.69	0.805952	0.38	1.16274	0.753	0.459
NR4A1	0.689	1.26038	0.378	1.81834	0.489	0.126
RPS4Y1	0.688	0.696484	0.376	1.00481	0.634	0.246
RPS26	0.314	-0.600037	0.372	-0.86567	0.898	0.958
GADD45B	0.668	0.992796	0.336	1.4323	0.502	0.182
MRPL18	0.663	0.849627	0.326	1.22575	0.431	0.112
IER2	0.661	0.753234	0.322	1.08669	0.625	0.334
DUSP1	0.66	0.677782	0.32	0.977833	0.859	0.645
NFKBIA	0.656	0.555337	0.312	0.801181	0.834	0.617
EGR1	0.655	1.16575	0.31	1.68182	0.398	0.093
IFITM1	0.345	-0.592715	0.31	-0.855108	0.697	0.782
SQSTM1	0.641	0.62829	0.282	0.906431	0.591	0.325
DNAJB4	0.637	0.987324	0.274	1.42441	0.339	0.067
SERTAD1	0.635	0.593652	0.27	0.856459	0.483	0.221
TUBB4B	0.632	0.571333	0.264	0.82426	0.505	0.249
RPL38	0.371	-0.414588	0.258	-0.598124	0.778	0.802
KLF2	0.625	0.797951	0.25	1.1512	0.46	0.211
SAT1	0.625	0.554169	0.25	0.799496	0.672	0.441
SRSF3	0.624	0.438192	0.248	0.632177	0.485	0.235
BAG3	0.622	0.909266	0.244	1.31179	0.311	0.07
ZFAND2A	0.622	1.17935	0.244	1.70144	0.3	0.059
DYNLL1	0.62	0.436456	0.24	0.629673	0.565	0.326
BTG2	0.62	0.558254	0.24	0.805391	0.679	0.47
CDKN1A	0.618	0.648224	0.236	0.93519	0.377	0.145
ATF3	0.617	0.818895	0.234	1.18142	0.352	0.12
HSPB1	0.616	0.730232	0.232	1.0535	0.518	0.309
DNAJB6	0.615	0.4518	0.23	0.651809	0.425	0.196
JUNB	0.613	0.415264	0.226	0.5991	0.848	0.638
RGS2	0.612	0.594102	0.224	0.857108	0.383	0.158
AHSA1	0.609	0.465437	0.218	0.671484	0.316	0.097
ANKRD37	0.609	0.728873	0.218	1.05154	0.33	0.117
ZFP36	0.607	0.50404	0.214	0.727176	0.792	0.623
FOS	0.606	0.536406	0.212	0.77387	0.728	0.555
CKS2	0.606	0.54649	0.212	0.788418	0.346	0.135
CD83	0.606	0.731581	0.212	1.05545	0.277	0.066
PMAIP1	0.604	0.570078	0.208	0.822449	0.316	0.107
DDIT4	0.604	0.526048	0.208	0.758927	0.739	0.565
RHOB	0.6	0.861423	0.2	1.24277	0.33	0.138
FOSB	0.599	0.461823	0.198	0.66627	0.562	0.373
DUSP2	0.598	0.496924	0.196	0.716909	0.665	0.494
HSPA6	0.594	2.02667	0.188	2.92387	0.201	0.014
UBE2S	0.592	0.476017	0.184	0.686747	0.32	0.133
NEU1	0.591	0.595423	0.182	0.859014	0.26	0.08
ODC1	0.589	0.424227	0.178	0.61203	0.352	0.172
PLIN2	0.588	0.515904	0.176	0.744292	0.304	0.129
TNF	0.581	0.848486	0.162	1.22411	0.216	0.056
DDIT3	0.574	0.417565	0.148	0.60242	0.284	0.136
IGKC	0.428	-0.795518	0.144	-1.14769	0.068	0.205
HCST	0.431	-0.441722	0.138	-0.637271	0.591	0.604
CCL20	0.562	0.760643	0.124	1.09738	0.18	0.056
SERPINH1	0.556	0.644859	0.112	0.930334	0.127	0.015
IER3	0.554	0.457197	0.108	0.659596	0.14	0.033
IFITM3	0.45	-0.431188	0.1	-0.622073	0.212	0.291
CD8A	0.453	-0.506534	0.094	-0.730775	0.191	0.272
JCHAIN	0.456	-0.484059	0.088	-0.69835	0.034	0.12
CD8B	0.459	-0.432778	0.082	-0.624366	0.133	0.208
KLRD1	0.465	-0.513005	0.07	-0.740109	0.092	0.157
IFNG	0.533	0.495016	0.066	0.714157	0.127	0.06
CTSW	0.472	-0.418465	0.056	-0.603718	0.192	0.231
AREG	0.478	-0.427851	0.044	-0.617259	0.256	0.286
MTRNR2L8	0.504	-2.17951	0.008	-3.14437	0.245	0.212

## Sheet: B cells
GeneName	myAUC	avg_diff	power	avg_log2FC	pct.1	pct.2
HSP90AA1	0.831	1.54313	0.662	2.22626	0.893	0.516
DNAJB1	0.826	1.85618	0.652	2.6779	0.79	0.255
JUN	0.788	1.3622	0.576	1.96523	0.87	0.479
HSPA1B	0.785	1.73369	0.57	2.50119	0.668	0.141
HSPA1A	0.776	2.16309	0.552	3.12067	0.635	0.118
HSPA8	0.75	1.11795	0.5	1.61286	0.858	0.659
DUSP1	0.736	1.08548	0.472	1.56601	0.84	0.519
PPP1R15A	0.734	1.01914	0.468	1.47032	0.757	0.403
UBB	0.729	0.82351	0.458	1.18807	0.858	0.674
DNAJA1	0.728	1.19937	0.456	1.73032	0.627	0.26
JUNB	0.726	1.11708	0.452	1.61161	0.799	0.472
HSP90AB1	0.724	0.912634	0.448	1.31665	0.865	0.677
UBC	0.722	0.822275	0.444	1.18629	0.903	0.747
FOS	0.716	0.994263	0.432	1.43442	0.79	0.453
RHOB	0.715	1.20815	0.43	1.743	0.603	0.229
HSPE1	0.707	1.13662	0.414	1.6398	0.68	0.413
NR4A1	0.705	1.20535	0.41	1.73896	0.615	0.268
CD83	0.692	1.22332	0.384	1.76488	0.584	0.242
BTG1	0.69	0.86192	0.38	1.24349	0.881	0.687
HSPH1	0.684	0.934094	0.368	1.34761	0.494	0.157
MT-CO1	0.683	0.445115	0.366	0.642165	0.993	0.991
H3F3B	0.682	0.631045	0.364	0.910406	0.913	0.754
CD69	0.682	1.27723	0.364	1.84265	0.642	0.374
IER2	0.675	0.78802	0.35	1.13687	0.626	0.333
NFKBIA	0.675	0.799668	0.35	1.15368	0.7	0.463
ZFP36	0.672	0.935511	0.344	1.34966	0.73	0.499
GADD45B	0.671	1.05364	0.342	1.52009	0.486	0.16
HLA-B	0.67	0.451528	0.34	0.651417	0.97	0.936
HSPD1	0.667	0.753829	0.334	1.08755	0.592	0.338
KLF6	0.664	0.925102	0.328	1.33464	0.685	0.446
SARAF	0.661	0.552311	0.322	0.796817	0.791	0.596
ACTB	0.658	0.497797	0.316	0.718169	0.959	0.862
DUSP2	0.658	0.973406	0.316	1.40433	0.516	0.235
LAPTM5	0.658	0.57932	0.316	0.835782	0.733	0.482
MT-ND1	0.657	0.419049	0.314	0.60456	0.96	0.93
TSC22D3	0.655	0.528798	0.31	0.762894	0.92	0.775
CD74	0.654	0.43623	0.308	0.629347	0.989	0.961
EEF1A1	0.651	0.408539	0.302	0.589397	0.99	0.985
KLF2	0.65	0.909696	0.3	1.31241	0.685	0.513
JCHAIN	0.351	-0.622544	0.298	-0.898141	0.466	0.719
CACYBP	0.648	0.808231	0.296	1.16603	0.413	0.141
ZFP36L1	0.647	0.596326	0.294	0.860316	0.641	0.385
HNRNPA1	0.647	0.431285	0.294	0.622212	0.831	0.66
PABPC1	0.646	0.410204	0.292	0.5918	0.882	0.764
SAT1	0.646	0.645305	0.292	0.930978	0.676	0.448
TMEM258	0.354	-0.52212	0.292	-0.75326	0.468	0.653
IGHA1	0.355	-1.09331	0.29	-1.57732	0.442	0.661
SERTAD1	0.642	0.688785	0.284	0.993707	0.425	0.159
MRPL18	0.642	0.759576	0.284	1.09584	0.401	0.141
SQSTM1	0.642	0.633935	0.284	0.914574	0.617	0.416
EGR1	0.641	0.893401	0.282	1.2889	0.388	0.114
CXCR4	0.64	0.574559	0.28	0.828913	0.675	0.415
EIF1	0.639	0.436117	0.278	0.629184	0.929	0.919
FOSB	0.637	0.662858	0.274	0.956302	0.579	0.361
HNRNPA2B1	0.636	0.412879	0.272	0.595659	0.768	0.584
RPS4Y1	0.633	0.651337	0.266	0.939681	0.48	0.233
SSR4	0.368	-0.588125	0.264	-0.848485	0.632	0.75
TUBA1B	0.63	0.501374	0.26	0.72333	0.526	0.297
DDIT4	0.629	0.641598	0.258	0.92563	0.671	0.503
SRSF7	0.629	0.541314	0.258	0.780951	0.575	0.365
IGKC	0.371	-1.40283	0.258	-2.02386	0.477	0.669
HNRNPA0	0.628	0.472623	0.256	0.681851	0.531	0.311
HNRNPDL	0.628	0.406985	0.256	0.587155	0.675	0.488
HLA-DRB1	0.624	0.421498	0.248	0.608093	0.753	0.507
TUBA1A	0.623	0.709114	0.246	1.02303	0.413	0.179
IGHA2	0.377	-1.21755	0.246	-1.75655	0.361	0.562
HLA-DRA	0.622	0.406358	0.244	0.586251	0.72	0.501
KRTCAP2	0.378	-0.46869	0.244	-0.676177	0.454	0.622
RHOH	0.62	0.559729	0.24	0.807519	0.534	0.333
SLC2A3	0.619	0.569454	0.238	0.821549	0.464	0.23
ANKRD37	0.619	0.764698	0.238	1.10323	0.409	0.206
CKS2	0.618	0.652034	0.236	0.940686	0.366	0.144
CDKN1A	0.618	0.715021	0.236	1.03156	0.38	0.166
LTB	0.618	0.452247	0.236	0.652454	0.546	0.319
NR4A2	0.617	0.663241	0.234	0.956854	0.471	0.245
HSPB1	0.616	0.910437	0.232	1.31348	0.415	0.224
ZFP36L2	0.616	0.472723	0.232	0.681995	0.867	0.76
PMAIP1	0.615	0.62855	0.23	0.906806	0.335	0.115
MARCKSL1	0.615	0.503697	0.23	0.726681	0.431	0.205
IRF8	0.614	0.493858	0.228	0.712486	0.441	0.218
ATP6V0C	0.614	0.494062	0.228	0.712781	0.607	0.458
TUBB4B	0.613	0.545755	0.226	0.787358	0.411	0.21
CD55	0.61	0.547402	0.22	0.789734	0.539	0.356
DNAJB4	0.61	0.619192	0.22	0.893305	0.296	0.084
BTG2	0.609	0.416383	0.218	0.600714	0.706	0.566
SRSF2	0.608	0.422452	0.216	0.609469	0.479	0.293
STK17A	0.608	0.433817	0.216	0.625866	0.54	0.345
DDIT3	0.604	0.631906	0.208	0.911648	0.337	0.146
REL	0.602	0.415712	0.204	0.599746	0.449	0.245
EIF5	0.601	0.407709	0.202	0.588199	0.58	0.442
BIRC3	0.6	0.514846	0.2	0.742765	0.377	0.192
IER5	0.6	0.693832	0.2	1.00099	0.259	0.062
ID3	0.599	0.630083	0.198	0.909018	0.387	0.201
SNHG8	0.598	0.424026	0.196	0.611741	0.609	0.493
SFPQ	0.597	0.426081	0.194	0.614705	0.45	0.286
ODC1	0.594	0.432653	0.188	0.624187	0.472	0.321
EIF4A3	0.593	0.478783	0.186	0.690737	0.32	0.144
LINC00926	0.592	0.425575	0.184	0.613975	0.35	0.167
MYC	0.592	0.666228	0.184	0.961163	0.249	0.067
CLK1	0.592	0.420995	0.184	0.607368	0.348	0.18
YPEL5	0.592	0.417905	0.184	0.602909	0.55	0.401
SOCS1	0.591	0.426468	0.182	0.615264	0.368	0.191
BRD2	0.591	0.406008	0.182	0.585746	0.481	0.338
IGKV3-20	0.411	-0.65413	0.178	-0.94371	0.195	0.373
CCR7	0.588	0.551424	0.176	0.795537	0.309	0.135
SELL	0.587	0.427678	0.174	0.617009	0.314	0.142
H2AFX	0.586	0.443111	0.172	0.639274	0.265	0.099
ZFAND5	0.585	0.421161	0.17	0.607607	0.332	0.178
RGS2	0.584	0.50202	0.168	0.724261	0.342	0.182
IGKV3-11	0.417	-0.513746	0.166	-0.741178	0.121	0.285
TCL1A	0.583	0.646645	0.166	0.932912	0.275	0.109
ZFAND2A	0.583	0.754427	0.166	1.08841	0.232	0.075
TAGAP	0.583	0.454489	0.166	0.655689	0.443	0.303
DNAJB6	0.582	0.40599	0.164	0.58572	0.318	0.167
FCER2	0.581	0.507573	0.162	0.732273	0.265	0.107
ATF3	0.58	0.628739	0.16	0.907079	0.25	0.094
IGLC2	0.422	-1.19395	0.156	-1.72251	0.159	0.306
IGKV3-15	0.422	-0.491293	0.156	-0.708786	0.111	0.268
ZNF331	0.578	0.578063	0.156	0.833969	0.333	0.187
HSPA6	0.578	1.30343	0.156	1.88045	0.175	0.019
GTF2B	0.576	0.416092	0.152	0.600294	0.376	0.246
MYLIP	0.574	0.413465	0.148	0.596504	0.208	0.064
BAG3	0.573	0.574517	0.146	0.828854	0.186	0.043
RBKS	0.573	0.522045	0.146	0.753151	0.228	0.086
ARL4A	0.569	0.414345	0.138	0.597774	0.246	0.11
AREG	0.567	0.455742	0.134	0.657497	0.36	0.238
IGLV2-23	0.435	-1.27796	0.13	-1.8437	0.056	0.188
CHMP1B	0.562	0.437019	0.124	0.630486	0.223	0.103
TNF	0.558	0.535462	0.116	0.772508	0.146	0.031
CLEC2B	0.557	0.570365	0.114	0.822863	0.227	0.121
IGLV3-1	0.443	-0.583506	0.114	-0.841821	0.142	0.259
IGKV1-16	0.444	-2.73053	0.112	-3.93933	0.037	0.149
IGLV2-14	0.448	-0.772591	0.104	-1.11461	0.12	0.228
IGKV1-9	0.448	-1.06788	0.104	-1.54063	0.064	0.168
IGLV2-11	0.449	-0.435231	0.102	-0.627906	0.055	0.158
IGLV1-51	0.456	-0.813806	0.088	-1.17407	0.045	0.133
IGLC3	0.457	-0.925536	0.086	-1.33527	0.118	0.201
IGKV3D-11	0.457	-1.17249	0.086	-1.69154	0.058	0.143
KLF4	0.541	0.439209	0.082	0.633645	0.109	0.028
IGKV4-1	0.461	-0.500814	0.078	-0.722522	0.168	0.253
IGLV6-57	0.465	-2.21089	0.07	-3.18964	0.088	0.155
IGHV3-30	0.466	-0.70881	0.068	-1.0226	0.071	0.141
IGKV3D-20	0.466	-0.469049	0.068	-0.676694	0.042	0.111
IGLV1-47	0.467	-2.23937	0.066	-3.23073	0.035	0.101
IGKV1-6	0.47	0.55811	0.06	0.805183	0.065	0.126
AC233755.1	0.471	-1.07416	0.058	-1.54968	0.049	0.108
IGLV2-8	0.474	0.427829	0.052	0.617227	0.074	0.127
IGLV1-40	0.478	0.498446	0.044	0.719106	0.069	0.115
IGHV1-2	0.482	-0.585035	0.036	-0.844027	0.07	0.106

## Sheet: NK cells
GeneName	myAUC	avg_diff	power	avg_log2FC	pct.1	pct.2
HSP90AA1	0.842	1.57638	0.684	2.27424	0.935	0.664
DNAJB1	0.84	2.02434	0.68	2.9205	0.846	0.336
HSPA8	0.823	1.12824	0.646	1.62771	0.954	0.794
HSPA1A	0.818	2.23534	0.636	3.22491	0.704	0.084
RPS26	0.213	-0.984262	0.574	-1.41999	0.911	0.985
DNAJA1	0.784	1.3296	0.568	1.91821	0.792	0.389
HSPA1B	0.778	1.89074	0.556	2.72776	0.642	0.107
RPS29	0.228	-0.679905	0.544	-0.980896	0.871	0.969
RPS27	0.231	-0.501496	0.538	-0.723505	0.989	1
RPS21	0.24	-0.507731	0.52	-0.732501	0.954	1
HSPE1	0.757	1.00106	0.514	1.44422	0.763	0.351
HSP90AB1	0.756	0.992337	0.512	1.43164	0.865	0.634
IER2	0.755	1.04095	0.51	1.50177	0.887	0.557
UBC	0.749	0.735073	0.498	1.06049	0.933	0.756
IFITM1	0.26	-0.641016	0.48	-0.92479	0.922	0.992
NR4A1	0.727	1.19123	0.454	1.71858	0.66	0.275
JUN	0.727	1.40576	0.454	2.02808	0.798	0.542
CACYBP	0.72	1.15506	0.44	1.6664	0.512	0.084
PPP1R15A	0.716	1.00731	0.432	1.45324	0.776	0.489
HSPD1	0.714	1.15344	0.428	1.66406	0.59	0.221
GZMK	0.288	-1.22319	0.424	-1.76469	0.24	0.595
GADD45B	0.712	1.1973	0.424	1.72734	0.687	0.336
SERTAD1	0.701	0.905914	0.402	1.30696	0.666	0.313
JUNB	0.696	0.775108	0.392	1.11824	0.911	0.725
MRPL18	0.696	1.0679	0.392	1.54065	0.442	0.053
HCST	0.307	-0.560442	0.386	-0.808547	0.806	0.885
RPL37A	0.308	-0.436714	0.384	-0.630046	0.938	0.969
HSPH1	0.692	1.1452	0.384	1.65217	0.512	0.168
IFITM2	0.309	-0.572092	0.382	-0.825354	0.841	0.916
IFITM3	0.312	-0.924233	0.376	-1.33339	0.426	0.687
UBB	0.688	0.541839	0.376	0.781708	0.922	0.824
RPS4Y1	0.68	0.685743	0.36	0.989317	0.615	0.267
SRSF3	0.677	0.710214	0.354	1.02462	0.596	0.267
PMAIP1	0.673	1.06087	0.346	1.53051	0.456	0.115
CSRNP1	0.668	0.746216	0.336	1.07656	0.571	0.29
DYNLL1	0.667	0.767976	0.334	1.10795	0.606	0.29
BTG2	0.66	0.824258	0.32	1.18915	0.757	0.519
UQCR11	0.34	-0.553059	0.32	-0.797896	0.509	0.687
CCL5	0.34	-0.433772	0.32	-0.625801	0.879	0.939
EGR1	0.656	1.41369	0.312	2.03952	0.439	0.153
TMA7	0.344	-0.415095	0.312	-0.598855	0.814	0.84
ZFP36	0.651	0.808838	0.302	1.16691	0.906	0.817
H2AFX	0.651	0.826363	0.302	1.19219	0.439	0.145
DNAJB6	0.651	0.567372	0.302	0.818544	0.536	0.26
DUSP1	0.65	0.667724	0.3	0.963323	0.892	0.718
BRD2	0.645	0.553086	0.29	0.797935	0.668	0.443
SRSF2	0.643	0.522204	0.286	0.753382	0.606	0.336
H2AFZ	0.642	0.58638	0.284	0.845967	0.636	0.382
NFKBIA	0.641	0.593902	0.282	0.85682	0.846	0.679
DUSP2	0.64	0.67999	0.28	0.981018	0.876	0.718
RHOB	0.64	1.04695	0.28	1.51043	0.504	0.237
TUBA1B	0.639	0.509241	0.278	0.734679	0.577	0.313
SQSTM1	0.639	0.568817	0.278	0.82063	0.69	0.473
ANKRD37	0.638	0.758721	0.276	1.0946	0.375	0.107
IL2RB	0.364	-0.509891	0.272	-0.735618	0.485	0.656
TUBB4B	0.634	0.602828	0.268	0.869697	0.601	0.344
CITED2	0.633	0.636882	0.266	0.918827	0.555	0.321
RPL38	0.367	-0.408268	0.266	-0.589006	0.752	0.824
EIF5	0.63	0.452356	0.26	0.652612	0.604	0.382
SAT1	0.63	0.578536	0.26	0.834651	0.606	0.382
SNRPD2	0.371	-0.413784	0.258	-0.596965	0.66	0.718
NR4A2	0.627	0.54676	0.254	0.788808	0.722	0.55
TAGAP	0.626	0.500715	0.252	0.722379	0.598	0.366
ATF3	0.626	0.791963	0.252	1.14256	0.426	0.176
ZFP36L1	0.623	0.580087	0.246	0.836888	0.633	0.42
LDHA	0.623	0.463706	0.246	0.668986	0.725	0.504
CDKN1A	0.622	0.794443	0.244	1.14614	0.329	0.092
HERPUD1	0.618	0.495947	0.236	0.7155	0.526	0.29
CD160	0.383	-0.589128	0.234	-0.849932	0.232	0.443
ZFAS1	0.616	0.408493	0.232	0.589331	0.617	0.397
UCP2	0.613	0.442906	0.226	0.638978	0.574	0.374
CCNL1	0.613	0.415977	0.226	0.600127	0.439	0.198
WSB1	0.612	0.469873	0.224	0.677884	0.418	0.198
PHLDA1	0.612	0.618773	0.224	0.892701	0.388	0.16
ZC3H12A	0.612	0.497364	0.224	0.717544	0.464	0.244
RGS2	0.61	0.59231	0.22	0.854523	0.431	0.229
NFKBIZ	0.609	0.579114	0.218	0.835485	0.553	0.351
ZFAND5	0.607	0.496501	0.214	0.7163	0.482	0.282
SDCBP	0.606	0.467759	0.212	0.674833	0.491	0.282
CXCR4	0.606	0.515827	0.212	0.744181	0.79	0.672
CHORDC1	0.605	0.532227	0.21	0.767841	0.267	0.053
JMJD6	0.602	0.506326	0.204	0.730473	0.356	0.16
ZFAND2A	0.602	0.828644	0.204	1.19548	0.264	0.061
ODC1	0.598	0.501595	0.196	0.723649	0.313	0.115
HSPA6	0.598	1.87502	0.196	2.70507	0.232	0.038
MYLIP	0.597	0.538041	0.194	0.776229	0.296	0.107
HSPA4	0.597	0.446087	0.194	0.643568	0.264	0.069
FOS	0.595	0.501016	0.19	0.722813	0.822	0.718
CD83	0.595	0.770419	0.19	1.11148	0.334	0.153
ATP1B3	0.595	0.490149	0.19	0.707135	0.272	0.084
TXNIP	0.595	0.407594	0.19	0.588034	0.846	0.786
UBE2S	0.592	0.521618	0.184	0.752536	0.34	0.153
ICAM1	0.592	0.773761	0.184	1.1163	0.283	0.107
DDIT4	0.591	0.419533	0.182	0.605259	0.863	0.794
MARCKSL1	0.591	0.602906	0.182	0.869809	0.253	0.076
IER3	0.59	0.684552	0.18	0.9876	0.267	0.092
ELL2	0.589	0.444805	0.178	0.641719	0.259	0.076
DNAJB4	0.586	0.582622	0.172	0.840545	0.264	0.099
DDIT3	0.583	0.470488	0.166	0.67877	0.364	0.206
IFNG	0.581	1.15081	0.162	1.66027	0.272	0.122
FGFBP2	0.581	0.62385	0.162	0.900026	0.291	0.13
PTMS	0.42	-0.487726	0.16	-0.703641	0.119	0.267
FOSB	0.58	0.423362	0.16	0.610782	0.593	0.481
RGS16	0.58	0.582364	0.16	0.840174	0.226	0.069
ITM2C	0.421	-0.675	0.158	-0.973819	0.305	0.405
FAM53C	0.579	0.488352	0.158	0.704542	0.24	0.084
HSPB1	0.578	0.50188	0.156	0.724059	0.361	0.206
SRM	0.423	-0.441309	0.154	-0.636674	0.092	0.237
ETS1	0.424	-0.417852	0.152	-0.602833	0.426	0.496
PLK2	0.576	0.496805	0.152	0.716738	0.21	0.061
NEU1	0.575	0.637186	0.15	0.919266	0.243	0.099
MZT2B	0.428	-0.433293	0.144	-0.625109	0.434	0.489
PIM2	0.572	0.422007	0.144	0.608828	0.404	0.26
IFI27L2	0.429	-0.475563	0.142	-0.686093	0.218	0.328
GRASP	0.569	0.424678	0.138	0.612681	0.175	0.038
RBKS	0.567	0.502753	0.134	0.725319	0.323	0.198
LAG3	0.434	-0.505631	0.132	-0.729471	0.078	0.206
FCGR3A	0.566	0.426721	0.132	0.615628	0.447	0.351
BAG3	0.562	0.481497	0.124	0.694653	0.173	0.046
MTSS1	0.562	0.414333	0.124	0.597756	0.148	0.023
ADRB2	0.559	0.495582	0.118	0.714974	0.183	0.069
KLF2	0.558	0.511892	0.116	0.738504	0.442	0.359
BPGM	0.556	0.407253	0.112	0.587541	0.151	0.038
KIR3DL1	0.554	0.488976	0.108	0.705444	0.189	0.084
IGKC	0.447	-0.532325	0.106	-0.767983	0.059	0.16
IGKV3-20	0.452	-0.45279	0.096	-0.653237	0.011	0.107
ANXA1	0.546	0.516622	0.092	0.745328	0.52	0.45
CCL3	0.542	0.682328	0.084	0.984391	0.415	0.351
TNF	0.535	0.538488	0.07	0.776874	0.108	0.038
CCL3L1	0.522	0.54565	0.044	0.787206	0.132	0.092

## Sheet: Epithelial cells
GeneName	myAUC	avg_diff	power	avg_log2FC	pct.1	pct.2
RPL8	0.713	0.581253	0.426	0.838571	0.933	0.846
RPL13	0.708	0.597763	0.416	0.862389	0.953	0.948
RPS2	0.708	0.64396	0.416	0.929038	0.926	0.879
RPS15	0.7	0.832756	0.4	1.20141	0.945	0.927
EEF1D	0.7	0.784459	0.4	1.13173	0.836	0.705
RPL12	0.691	0.596892	0.382	0.861133	0.926	0.894
PPDPF	0.69	0.616565	0.38	0.889515	0.905	0.818
RPL36	0.681	0.883298	0.362	1.27433	0.908	0.864
RPS18	0.663	0.554476	0.326	0.79994	0.936	0.917
CD74	0.34	-1.07676	0.32	-1.55344	0.196	0.487
MTRNR2L8	0.342	-4.20721	0.316	-6.06973	0.147	0.435
TSPAN8	0.343	-0.841516	0.314	-1.21405	0.363	0.588
RPLP2	0.652	0.45819	0.304	0.661028	0.878	0.794
PIGR	0.351	-0.461617	0.298	-0.665973	0.345	0.652
DPEP1	0.648	0.929947	0.296	1.34163	0.545	0.304
RPL19	0.647	0.659729	0.294	0.951788	0.901	0.845
RPS21	0.646	0.816112	0.292	1.1774	0.817	0.723
RPL35	0.645	0.579501	0.29	0.836043	0.854	0.789
LYZ	0.356	-1.16962	0.288	-1.68741	0.136	0.406
RPS27	0.643	0.692976	0.286	0.999753	0.88	0.83
MT-ND6	0.357	-0.748202	0.286	-1.07943	0.323	0.573
B2M	0.359	-0.548202	0.282	-0.790888	0.578	0.728
LGALS4	0.36	-0.551871	0.28	-0.796182	0.622	0.757
PRAC1	0.639	1.05889	0.278	1.52766	0.296	0.019
RPL21	0.639	0.649772	0.278	0.937422	0.79	0.718
RPS28	0.637	0.548112	0.274	0.790758	0.868	0.769
SELENOW	0.364	-0.599998	0.272	-0.865614	0.443	0.624
RPL30	0.63	0.661062	0.26	0.953711	0.865	0.777
PKM	0.375	-0.625086	0.25	-0.901808	0.37	0.559
ATP5F1D	0.624	0.531518	0.248	0.766818	0.695	0.588
RPL37A	0.624	0.590014	0.248	0.851211	0.812	0.755
RPL31	0.621	0.542521	0.242	0.782692	0.771	0.717
ATP5F1E	0.616	0.492008	0.232	0.709818	0.733	0.626
CLDN3	0.615	0.475923	0.23	0.686611	0.836	0.758
KLF5	0.614	0.590727	0.228	0.852239	0.735	0.631
RPL27A	0.613	0.482276	0.226	0.695778	0.69	0.614
C9orf16	0.61	0.610682	0.22	0.881028	0.574	0.455
ANXA2	0.392	-0.587661	0.216	-0.847815	0.411	0.573
SOD1	0.396	-0.539849	0.208	-0.778838	0.324	0.5
JUND	0.602	0.669621	0.204	0.966059	0.438	0.287
PGK1	0.399	-0.496089	0.202	-0.715705	0.273	0.456
LCN2	0.4	-0.948186	0.2	-1.36794	0.346	0.504
TRPM4	0.402	-0.576957	0.196	-0.832372	0.152	0.343
AL365226.2	0.404	-0.636142	0.192	-0.917759	0.02	0.212
ERBB3	0.407	-0.421565	0.186	-0.608189	0.187	0.373
CEACAM6	0.409	-0.772012	0.182	-1.11378	0.286	0.432
DDX17	0.41	-0.446125	0.18	-0.643623	0.241	0.418
NCOR1	0.41	-0.485869	0.18	-0.700961	0.192	0.37
TFF1	0.411	-1.22262	0.178	-1.76386	0.149	0.303
NUPR1	0.412	-0.65731	0.176	-0.948298	0.115	0.292
NUCB1	0.413	-0.423477	0.174	-0.610948	0.168	0.336
ACTN4	0.413	-0.499263	0.174	-0.720285	0.469	0.614
ELOB	0.587	0.471425	0.174	0.680122	0.723	0.654
AHNAK	0.414	-0.556649	0.172	-0.803075	0.277	0.446
JUNB	0.586	0.482114	0.172	0.695544	0.695	0.621
MT2A	0.415	-0.794326	0.17	-1.14597	0.152	0.311
COMMD6	0.585	0.497035	0.17	0.71707	0.533	0.464
ALDOA	0.417	-0.443568	0.166	-0.639933	0.38	0.509
QTRT1	0.583	0.541572	0.166	0.781323	0.423	0.298
NQO1	0.419	-0.412676	0.162	-0.595365	0.18	0.337
MT1E	0.419	-0.750567	0.162	-1.08284	0.123	0.275
TMEM176A	0.581	0.528254	0.162	0.76211	0.414	0.301
MUC12	0.581	1.12028	0.162	1.61623	0.352	0.214
COMTD1	0.58	0.532734	0.16	0.768573	0.426	0.318
CLDN4	0.58	0.59347	0.16	0.856197	0.818	0.772
REX1BD	0.578	0.478166	0.156	0.689847	0.48	0.383
FAM3B	0.423	-0.493022	0.154	-0.711281	0.037	0.19
NEAT1	0.423	-0.424864	0.154	-0.612948	0.704	0.815
ITGA6	0.577	0.588735	0.154	0.849365	0.566	0.512
LENG8	0.424	-0.567478	0.152	-0.818697	0.177	0.331
EFNB2	0.576	0.655623	0.152	0.945864	0.322	0.197
RPL39	0.576	0.421203	0.152	0.607668	0.829	0.774
RPL36A	0.576	0.466034	0.152	0.672345	0.553	0.496
CEBPD	0.575	0.578829	0.15	0.835074	0.427	0.321
DNPH1	0.575	0.444606	0.15	0.641431	0.449	0.359
ZFP36L2	0.575	0.410579	0.15	0.59234	0.692	0.638
CEACAM5	0.426	-0.44745	0.148	-0.645533	0.411	0.542
GADD45GIP1	0.574	0.47294	0.148	0.682308	0.494	0.408
METTL26	0.574	0.429582	0.148	0.619755	0.486	0.399
NCOA7	0.428	-0.517535	0.144	-0.746646	0.155	0.296
CYP3A5	0.429	-0.411755	0.142	-0.594037	0.294	0.427
ANKRD37	0.429	-0.481769	0.142	-0.695046	0.164	0.305
PDZK1IP1	0.43	-0.560376	0.14	-0.808451	0.238	0.353
POLR1D	0.57	0.456648	0.14	0.658804	0.482	0.42
MT1G	0.431	-0.837946	0.138	-1.2089	0.148	0.275
REG1A	0.431	-1.12121	0.138	-1.61756	0.03	0.168
PPP1R1B	0.569	0.722576	0.138	1.04246	0.432	0.372
MT1X	0.432	-0.60388	0.136	-0.871214	0.146	0.276
CKB	0.568	0.891385	0.136	1.286	0.349	0.244
MACROD1	0.568	0.437139	0.136	0.630658	0.284	0.164
KLF4	0.568	0.44869	0.136	0.647323	0.436	0.336
TRIR	0.567	0.433395	0.134	0.625258	0.496	0.444
WFDC2	0.567	0.889461	0.134	1.28322	0.226	0.102
AC103702.2	0.567	0.439449	0.134	0.633991	0.42	0.32
RPL38	0.566	0.409307	0.132	0.590506	0.632	0.61
HSPH1	0.566	0.54642	0.132	0.788317	0.511	0.419
GDF15	0.565	0.652977	0.13	0.942046	0.521	0.455
SQSTM1	0.565	0.43112	0.13	0.621975	0.734	0.708
FAM118A	0.436	-0.514441	0.128	-0.742181	0.051	0.179
TESC	0.436	-0.67626	0.128	-0.975637	0.15	0.264
CCDC85B	0.564	0.493264	0.128	0.711629	0.388	0.297
CEBPB	0.562	0.581302	0.124	0.838642	0.24	0.13
CPNE7	0.561	0.667917	0.122	0.963601	0.184	0.068
TGFBI	0.439	-0.452319	0.122	-0.652559	0.242	0.353
LGR5	0.44	-0.515238	0.12	-0.743332	0.062	0.181
CHRNA7	0.441	-1.2804	0.118	-1.84722	0.017	0.134
LGALS2	0.442	-0.901389	0.116	-1.30043	0.05	0.162
MUC2	0.442	-0.739528	0.116	-1.06691	0.222	0.32
GTF3A	0.557	0.456787	0.114	0.659005	0.347	0.275
RND3	0.557	0.676494	0.114	0.975974	0.273	0.179
SLC7A5	0.556	0.55744	0.112	0.804215	0.279	0.182
TPGS1	0.555	0.418272	0.11	0.603439	0.26	0.165
DPP7	0.555	0.410422	0.11	0.592113	0.31	0.22
SOD3	0.445	-0.435316	0.11	-0.628028	0.125	0.233
ZFAS1	0.553	0.458744	0.106	0.661828	0.504	0.49
PGGHG	0.552	0.548889	0.104	0.79188	0.161	0.058
DUOX2	0.448	-0.522194	0.104	-0.753366	0.065	0.168
LINC01088	0.448	-0.448559	0.104	-0.647133	0.002	0.105
CCL20	0.449	-0.446185	0.102	-0.643709	0.078	0.18
IER3	0.55	0.417466	0.1	0.602276	0.556	0.525
CLTB	0.55	0.487306	0.1	0.703033	0.472	0.445
BST2	0.45	-0.446319	0.1	-0.643902	0.041	0.139
CHCHD7	0.549	0.450095	0.098	0.649349	0.303	0.225
PTPRO	0.452	-0.532442	0.096	-0.768151	0.032	0.127
HLA-DRA	0.452	-0.487338	0.096	-0.70308	0.026	0.122
CDV3	0.546	0.441088	0.092	0.636356	0.237	0.163
ANO9	0.545	0.467569	0.09	0.674559	0.258	0.181
MT1H	0.455	-0.684587	0.09	-0.98765	0.023	0.113
TCIM	0.455	-0.433162	0.09	-0.62492	0.109	0.198
TNNC2	0.544	0.42788	0.088	0.617301	0.14	0.055
RGCC	0.544	0.466322	0.088	0.672761	0.141	0.057
MT1F	0.458	-0.505039	0.084	-0.728617	0.065	0.147
MT1M	0.458	-0.412335	0.084	-0.594873	0.018	0.102
MUC17	0.458	-0.490483	0.084	-0.707617	0.048	0.133
BAMBI	0.535	0.488075	0.07	0.704144	0.245	0.191
DUOXA2	0.465	-0.455307	0.07	-0.65687	0.034	0.104
TIMP3	0.531	0.802748	0.062	1.15812	0.14	0.082
MDK	0.531	0.558455	0.062	0.805681	0.418	0.405
SELENOP	0.527	0.432759	0.054	0.624339	0.176	0.128
PLA2G2A	0.48	0.649216	0.04	0.93662	0.122	0.171
GSN	0.489	0.467391	0.022	0.674302	0.194	0.226

## Sheet: Macrophage
GeneName	myAUC	avg_diff	power	avg_log2FC	pct.1	pct.2
EIF1	0.677	0.442786	0.354	0.638806	0.914	0.805
HLA-DQA2	0.671	0.934848	0.342	1.3487	0.587	0.304
APOE	0.352	-1.79144	0.296	-2.5845	0.145	0.413
TIMP1	0.639	0.791127	0.278	1.14136	0.784	0.634
HLA-DQB1	0.374	-0.569301	0.252	-0.821328	0.677	0.772
HLA-DRB5	0.62	0.43771	0.24	0.631481	0.872	0.746
CTSZ	0.38	-0.629849	0.24	-0.90868	0.517	0.637
BTG1	0.606	0.428372	0.212	0.61801	0.74	0.644
AREG	0.604	0.596846	0.208	0.861067	0.487	0.287
CTSB	0.397	-0.683941	0.206	-0.986719	0.807	0.822
DDIT4	0.599	0.607789	0.198	0.876854	0.574	0.416
CD55	0.598	0.536239	0.196	0.773629	0.481	0.307
HLA-DQA1	0.403	-0.626868	0.194	-0.904379	0.649	0.66
NR4A1	0.594	0.492239	0.188	0.71015	0.524	0.37
APOC1	0.406	-1.2258	0.188	-1.76845	0.141	0.314
BRI3	0.407	-0.575755	0.186	-0.830639	0.346	0.479
GPNMB	0.407	-0.808446	0.186	-1.16634	0.141	0.314
IFITM2	0.59	0.503937	0.18	0.727027	0.502	0.34
C1QB	0.411	-0.413074	0.178	-0.59594	0.344	0.518
PPIF	0.587	0.570471	0.174	0.823016	0.455	0.297
CD9	0.418	-0.615382	0.164	-0.887809	0.162	0.307
CTSC	0.422	-0.538659	0.156	-0.777121	0.569	0.627
LYZ	0.578	0.589044	0.156	0.849811	0.823	0.785
LAMP1	0.423	-0.46976	0.154	-0.67772	0.381	0.475
CTSD	0.423	-0.441371	0.154	-0.636764	0.418	0.515
CD81	0.425	-0.46376	0.15	-0.669064	0.229	0.36
NUPR1	0.426	-0.782711	0.148	-1.12921	0.022	0.168
BCL3	0.574	0.474175	0.148	0.684089	0.309	0.175
THBS1	0.574	0.741509	0.148	1.06977	0.305	0.165
TREM2	0.428	-0.458481	0.144	-0.661448	0.121	0.261
EREG	0.568	0.498158	0.136	0.71869	0.275	0.139
SPP1	0.433	-1.04732	0.134	-1.51097	0.091	0.224
HSPA6	0.566	0.572694	0.132	0.826222	0.309	0.178
HSPA1A	0.565	0.447072	0.13	0.644988	0.664	0.601
TSPAN4	0.436	-0.456323	0.128	-0.658335	0.164	0.277
APOBEC3A	0.564	0.699229	0.128	1.00877	0.204	0.079
CD69	0.564	0.622493	0.128	0.898067	0.216	0.092
CD300E	0.562	0.49333	0.124	0.711725	0.24	0.119
MSR1	0.439	-0.409387	0.122	-0.590621	0.108	0.224
MMP12	0.442	-0.724864	0.116	-1.04576	0.136	0.244
PDK4	0.443	-0.744535	0.114	-1.07414	0.104	0.211
AQP9	0.556	0.476795	0.112	0.68787	0.197	0.089
MRC1	0.448	-0.483979	0.104	-0.698234	0.201	0.29
SLC40A1	0.449	-0.614087	0.102	-0.88594	0.229	0.314
IFI6	0.449	-0.481857	0.102	-0.695173	0.206	0.29
IGKC	0.55	0.872199	0.1	1.25832	0.186	0.083
CCL18	0.45	-1.109	0.1	-1.59995	0.03	0.129
S100A8	0.549	-0.409243	0.098	-0.590413	0.431	0.327
ADA2	0.451	-0.412407	0.098	-0.594978	0.294	0.36
PLTP	0.451	-0.462323	0.098	-0.666991	0.132	0.228
LGMN	0.451	-0.80006	0.098	-1.15424	0.34	0.389
RNASE1	0.452	-0.749691	0.096	-1.08158	0.138	0.228
AHNAK	0.452	-0.510558	0.096	-0.73658	0.333	0.396
SELENOP	0.455	-0.521063	0.09	-0.751735	0.113	0.201
FOLR2	0.463	-0.40831	0.074	-0.589067	0.119	0.188
AC007952.4	0.464	-0.464571	0.072	-0.670235	0.134	0.201
FBP1	0.469	-0.448851	0.062	-0.647555	0.275	0.323
CCL2	0.47	-0.895788	0.06	-1.29235	0.046	0.106
MTRNR2L8	0.473	-2.86439	0.054	-4.13244	0.238	0.271
ACP5	0.474	-0.440705	0.052	-0.635803	0.442	0.432
MARCO	0.49	-0.453614	0.02	-0.654427	0.097	0.112
B4GALT1	0.5	-0.441574	0	-0.637056	0.251	0.241

## Sheet: Fibroblasts
GeneName	myAUC	avg_diff	power	avg_log2FC	pct.1	pct.2
IGFBP5	0.673	0.778211	0.346	1.12272	0.814	0.624
PTMA	0.328	-0.44743	0.344	-0.645506	0.819	0.891
CFD	0.668	1.16602	0.336	1.68222	0.609	0.321
FBLN1	0.667	0.818971	0.334	1.18153	0.758	0.624
HSPA8	0.339	-0.776691	0.322	-1.12053	0.549	0.738
BST2	0.349	-0.579604	0.302	-0.836192	0.367	0.633
IGFBP4	0.648	1.03003	0.296	1.48602	0.735	0.674
ATP5F1D	0.644	0.594013	0.288	0.85698	0.674	0.543
SULF1	0.362	-0.490928	0.276	-0.708259	0.549	0.765
NR4A1	0.367	-0.587447	0.266	-0.847507	0.223	0.493
TMSB10	0.368	-0.48099	0.264	-0.693922	0.851	0.882
KLF6	0.369	-0.618036	0.262	-0.891637	0.326	0.561
ZFP36L2	0.629	0.463678	0.258	0.668946	0.819	0.688
LGALS1	0.373	-0.461242	0.254	-0.665431	0.847	0.864
ID3	0.374	-0.541897	0.252	-0.781793	0.474	0.674
DNAJB1	0.375	-0.709657	0.25	-1.02382	0.474	0.67
IFITM2	0.624	0.453666	0.248	0.654501	0.716	0.57
BTG2	0.378	-0.982516	0.244	-1.41747	0.223	0.43
RGS16	0.378	-1.10939	0.244	-1.60051	0.07	0.308
GAPDH	0.379	-0.45161	0.242	-0.651536	0.86	0.914
RPL39	0.379	-0.522673	0.242	-0.754057	0.605	0.774
CTSC	0.62	0.52467	0.24	0.756939	0.693	0.584
MMP11	0.383	-0.778501	0.234	-1.12314	0.302	0.507
HOPX	0.383	-0.778905	0.234	-1.12372	0.047	0.276
CEBPD	0.615	0.519732	0.23	0.749815	0.753	0.674
PSMB9	0.385	-0.516758	0.23	-0.745524	0.256	0.466
RPS11	0.387	-0.40906	0.226	-0.590148	0.358	0.579
HSPA1A	0.388	-0.843406	0.224	-1.21678	0.684	0.751
COL12A1	0.389	-0.682082	0.222	-0.984036	0.586	0.71
IFI27	0.39	-0.542418	0.22	-0.782544	0.284	0.48
SOD3	0.607	0.438506	0.214	0.632631	0.651	0.534
TIMP3	0.605	0.623227	0.21	0.899126	0.749	0.643
HERPUD1	0.399	-0.477793	0.202	-0.689309	0.316	0.511
HSPH1	0.399	-0.723808	0.202	-1.04423	0.321	0.498
PLTP	0.6	0.779382	0.2	1.12441	0.502	0.367
RPS4Y1	0.4	-0.632945	0.2	-0.913146	0.107	0.303
PPP1R15A	0.4	-0.607875	0.2	-0.876978	0.479	0.615
ICAM1	0.4	-0.955972	0.2	-1.37918	0.256	0.416
RARRES3	0.4	-0.461094	0.2	-0.665218	0.233	0.416
TFPI2	0.597	1.55077	0.194	2.23729	0.242	0.05
MYO1E	0.403	-0.549812	0.194	-0.793211	0.13	0.326
INHBA	0.403	-0.425364	0.194	-0.613671	0.279	0.462
HSP90AA1	0.404	-0.493399	0.192	-0.711824	0.805	0.878
CAV1	0.405	-0.435231	0.19	-0.627905	0.367	0.552
HSPA1B	0.405	-0.807636	0.19	-1.16517	0.498	0.62
RAB31	0.407	-0.419008	0.186	-0.604501	0.302	0.489
IRF1	0.407	-0.646587	0.186	-0.932828	0.2	0.367
ATF3	0.408	-0.837368	0.184	-1.20807	0.26	0.412
COL4A1	0.592	0.492167	0.184	0.710047	0.66	0.552
ZFP36	0.409	-0.446189	0.182	-0.643715	0.567	0.697
RHOB	0.41	-0.518042	0.18	-0.747376	0.46	0.62
2022-09-11	0.59	0.480742	0.18	0.693564	0.581	0.511
MT-ND6	0.411	-0.427908	0.178	-0.61734	0.419	0.57
AC020916.1	0.411	-0.530922	0.178	-0.765958	0.088	0.267
COL10A1	0.411	-0.764671	0.178	-1.10319	0.014	0.19
LMO7	0.412	-0.518405	0.176	-0.7479	0.07	0.244
TNFSF11	0.412	-0.50892	0.176	-0.734217	0.098	0.271
TNFAIP3	0.412	-0.73907	0.176	-1.06625	0.14	0.308
RCN2	0.587	0.476467	0.174	0.687397	0.558	0.489
PITX1	0.586	0.551535	0.172	0.795696	0.316	0.158
TMEM258	0.415	-0.437955	0.17	-0.631835	0.247	0.398
ANKH	0.415	-0.472815	0.17	-0.682129	0.065	0.231
SFRP2	0.416	-1.34201	0.168	-1.93612	0.014	0.181
LTBP1	0.416	-0.45921	0.168	-0.6625	0.167	0.335
LTBP4	0.584	0.410996	0.168	0.592942	0.633	0.548
NFIC	0.584	0.42448	0.168	0.612395	0.642	0.588
PPIC	0.583	0.477884	0.166	0.689441	0.493	0.394
CTHRC1	0.419	-0.40821	0.162	-0.588922	0.405	0.552
NFKBIZ	0.419	-0.538104	0.162	-0.77632	0.34	0.471
WNT2B	0.578	0.534089	0.156	0.770527	0.274	0.131
GDF15	0.424	-0.562242	0.152	-0.811143	0.107	0.258
CAVIN3	0.574	0.426799	0.148	0.61574	0.558	0.498
GJB2	0.427	-0.466419	0.146	-0.672901	0.079	0.226
SLC6A6	0.428	-0.42477	0.144	-0.612814	0.093	0.231
PTOV1	0.572	0.605908	0.144	0.87414	0.395	0.303
SPPL2A	0.572	0.481727	0.144	0.694984	0.358	0.244
IL6ST	0.572	0.448171	0.144	0.646575	0.558	0.48
C11orf96	0.571	0.454403	0.142	0.655565	0.46	0.362
JAK1	0.571	0.420526	0.142	0.606691	0.549	0.471
CXCL2	0.43	-0.870936	0.14	-1.2565	0.084	0.222
BAG3	0.432	-0.615373	0.136	-0.887796	0.209	0.339
APOE	0.566	1.30453	0.132	1.88204	0.265	0.149
ADAMDEC1	0.566	0.827763	0.132	1.19421	0.367	0.262
SERBP1	0.566	0.440039	0.132	0.634842	0.516	0.484
CLMP	0.562	0.554106	0.124	0.799406	0.274	0.172
FN1	0.439	-0.438242	0.122	-0.63225	0.53	0.615
EMID1	0.558	0.471803	0.116	0.680668	0.335	0.249
MMP23B	0.558	0.437101	0.116	0.630603	0.27	0.167
THBD	0.556	0.52961	0.112	0.764066	0.274	0.172
COL14A1	0.556	0.478313	0.112	0.69006	0.363	0.267
RHOBTB3	0.556	0.457974	0.112	0.660717	0.493	0.457
PIM1	0.553	0.520326	0.106	0.750672	0.214	0.118
UBE2Q2	0.551	0.483434	0.102	0.697448	0.279	0.204
OSMR	0.55	0.447914	0.1	0.646203	0.33	0.262
HSPA6	0.45	-1.05064	0.1	-1.51575	0.06	0.158
ACTG2	0.549	0.568969	0.098	0.820849	0.33	0.24
CST1	0.452	-1.22186	0.096	-1.76277	0.07	0.163
MTRNR2L8	0.452	-2.62918	0.096	-3.79311	0.135	0.222
TXNIP	0.452	-0.406217	0.096	-0.586048	0.405	0.507
DNAJC1	0.547	0.42681	0.094	0.615757	0.344	0.29
LMOD1	0.547	0.486731	0.094	0.702205	0.195	0.109
CXCL3	0.453	-0.938078	0.094	-1.35336	0.042	0.136
HILPDA	0.454	-0.475688	0.092	-0.686273	0.028	0.118
ZNF580	0.544	0.426755	0.088	0.615677	0.298	0.24
PRKAR2B	0.543	0.534152	0.086	0.770618	0.172	0.095
PID1	0.543	0.439367	0.086	0.633873	0.112	0.027
AL136454.1	0.543	0.461909	0.086	0.666394	0.181	0.109
FSTL3	0.542	0.533488	0.084	0.769661	0.242	0.167
LOX	0.458	-0.436437	0.084	-0.629646	0.135	0.217
GADD45G	0.539	0.596962	0.078	0.861234	0.163	0.09
STMN2	0.539	0.583651	0.078	0.84203	0.107	0.032
PDZD2	0.462	-0.432411	0.076	-0.623836	0.074	0.149
CD248	0.537	0.420143	0.074	0.606138	0.274	0.222
CMIP	0.534	0.440063	0.068	0.634877	0.163	0.104
NEAT1	0.466	-0.406697	0.068	-0.586739	0.665	0.729
WFDC1	0.532	0.424617	0.064	0.612593	0.265	0.217
GSTM1	0.531	0.441736	0.062	0.637291	0.116	0.059
SLC9A3R2	0.529	0.45382	0.058	0.654724	0.27	0.24
GLUL	0.529	0.487439	0.058	0.703226	0.353	0.33
CXCL8	0.471	-0.623454	0.058	-0.899454	0.06	0.118
FGF7	0.527	0.414221	0.054	0.597595	0.158	0.109
HNRNPAB	0.526	0.419721	0.052	0.60553	0.279	0.267
TTC19	0.524	0.453182	0.048	0.653803	0.116	0.072
MGP	0.477	-0.429095	0.046	-0.619053	0.195	0.24
LAMA2	0.515	0.425754	0.03	0.614233	0.14	0.118
WAPL	0.514	0.423214	0.028	0.610568	0.149	0.131
COTL1	0.509	0.42458	0.018	0.612539	0.237	0.244
CST2	0.497	0.435941	0.006	0.628929	0.102	0.113

## Sheet: Endothelial cells
GeneName	myAUC	avg_diff	power	avg_log2FC	pct.1	pct.2
IFITM2	0.752	0.764368	0.504	1.10275	0.896	0.682
RPS2	0.712	0.559566	0.424	0.807283	0.917	0.818
DNAJB1	0.338	-1.00714	0.324	-1.453	0.396	0.611
BST2	0.357	-0.591159	0.286	-0.852862	0.354	0.606
HSPA8	0.357	-0.49466	0.286	-0.713644	0.682	0.763
HSPA1B	0.357	-0.87614	0.286	-1.264	0.469	0.636
JUN	0.357	-0.737489	0.286	-1.06397	0.656	0.758
HSPB1	0.359	-0.412486	0.282	-0.595092	0.833	0.919
HTRA1	0.632	0.515822	0.264	0.744174	0.641	0.449
HSPA1A	0.373	-0.646404	0.254	-0.932563	0.656	0.747
IGFBP2	0.626	0.767222	0.252	1.10687	0.411	0.187
CTSB	0.389	-0.416267	0.222	-0.600546	0.448	0.626
ATF3	0.399	-0.600566	0.202	-0.866434	0.224	0.399
RPS27L	0.4	-0.453177	0.2	-0.653797	0.354	0.505
HSPH1	0.402	-0.688904	0.196	-0.993879	0.344	0.475
FOSB	0.403	-0.43446	0.194	-0.626793	0.422	0.581
MTUS1	0.596	0.409501	0.192	0.590785	0.505	0.343
DNAJC3	0.594	0.412578	0.188	0.595225	0.427	0.253
EGR1	0.406	-0.855591	0.188	-1.23436	0.328	0.46
APOLD1	0.408	-0.554137	0.184	-0.79945	0.365	0.51
GSPT1	0.592	0.44276	0.184	0.638768	0.38	0.202
DNAJA1	0.409	-0.419449	0.182	-0.605136	0.583	0.677
PTTG1IP	0.591	0.407233	0.182	0.587513	0.682	0.621
INPP1	0.588	0.456635	0.176	0.658785	0.396	0.237
BCL3	0.587	0.405662	0.174	0.585246	0.349	0.182
KLF4	0.415	-0.516644	0.17	-0.74536	0.307	0.455
BAG3	0.416	-0.538687	0.168	-0.777162	0.292	0.429
F2RL3	0.584	0.642301	0.168	0.926645	0.5	0.354
NFKBIZ	0.417	-0.651984	0.166	-0.940613	0.281	0.414
DDIT4	0.579	0.411508	0.158	0.593681	0.62	0.51
HIPK3	0.579	0.433015	0.158	0.624708	0.255	0.101
IRF1	0.427	-0.431857	0.146	-0.623038	0.24	0.364
MED13L	0.573	0.444732	0.146	0.641612	0.198	0.051
CDV3	0.571	0.413015	0.142	0.595855	0.255	0.121
CDC42EP2	0.43	-0.413728	0.14	-0.596884	0.141	0.273
BTG2	0.43	-0.475187	0.14	-0.68555	0.208	0.333
EGLN1	0.57	0.446669	0.14	0.644407	0.286	0.157
TIMP3	0.569	0.463074	0.138	0.668075	0.698	0.601
CDKN1A	0.432	-0.45395	0.136	-0.654912	0.453	0.525
MT2A	0.567	0.424677	0.134	0.612679	0.547	0.439
C11orf96	0.566	0.503325	0.132	0.726144	0.286	0.167
FBLN2	0.564	0.51358	0.128	0.740939	0.198	0.071
RBMS1	0.564	0.425783	0.128	0.614275	0.396	0.298
FAM118A	0.437	-0.428683	0.126	-0.618458	0.052	0.177
IGFBP3	0.563	0.656935	0.126	0.947757	0.526	0.465
POSTN	0.56	0.514143	0.12	0.741752	0.208	0.091
CXCL2	0.44	-0.410065	0.12	-0.591598	0.12	0.242
CD55	0.559	0.440045	0.118	0.634851	0.464	0.348
ACKR1	0.558	0.520201	0.116	0.750491	0.354	0.242
PREX1	0.557	0.565076	0.114	0.815233	0.219	0.111
FILIP1L	0.555	0.419302	0.11	0.604925	0.427	0.348
CCL2	0.447	-0.441185	0.106	-0.636495	0.125	0.232
ITGA2	0.447	-0.432945	0.106	-0.624608	0.073	0.177
CD320	0.456	-0.591549	0.088	-0.853425	0.568	0.616
HSPA6	0.457	-0.50438	0.086	-0.727666	0.052	0.136
CPE	0.54	0.581951	0.08	0.839578	0.286	0.227
COL1A1	0.536	0.723155	0.072	1.04329	0.208	0.152
HLA-DRB1	0.536	0.423252	0.072	0.610623	0.344	0.298
COL1A2	0.532	0.417186	0.064	0.601873	0.208	0.152
S100A4	0.475	-0.555936	0.05	-0.802046	0.177	0.212
RGS5	0.476	-0.502427	0.048	-0.724849	0.255	0.288
IGFBP5	0.478	-0.462374	0.044	-0.667065	0.172	0.212
ACTA2	0.518	0.51579	0.036	0.744128	0.219	0.192
CLU	0.49	-0.437281	0.02	-0.630863	0.156	0.167
TFF3	0.508	0.483155	0.016	0.697045	0.12	0.106
NOV	0.499	-0.422574	0.002	-0.609646	0.13	0.131

## Sheet: Tissue stem cells
GeneName	myAUC	avg_diff	power	avg_log2FC	pct.1	pct.2
HSPA8	0.235	-1.05182	0.53	-1.51746	0.51	0.864
DNAJB1	0.284	-1.286	0.432	-1.85531	0.402	0.741
HSPA1B	0.287	-1.25612	0.426	-1.8122	0.422	0.753
HSPA1A	0.31	-1.09368	0.38	-1.57785	0.598	0.815
NFKBIA	0.324	-0.977609	0.352	-1.41039	0.52	0.753
HSPH1	0.329	-1.31113	0.342	-1.89157	0.206	0.519
BTG2	0.331	-0.767583	0.338	-1.10739	0.206	0.543
MTRNR2L12	0.341	-0.669466	0.318	-0.965836	0.333	0.741
EGR1	0.347	-0.501182	0.306	-0.723052	0.451	0.741
RPS2	0.651	0.590016	0.302	0.851213	0.853	0.667
PPP1R15A	0.349	-0.838518	0.302	-1.20973	0.422	0.654
JUN	0.349	-0.584611	0.302	-0.843415	0.618	0.802
ZFP36	0.356	-0.535818	0.288	-0.773022	0.618	0.84
COL4A1	0.642	0.439876	0.284	0.634607	0.833	0.79
HSPB1	0.359	-0.507413	0.282	-0.732043	0.853	0.938
HSP90AA1	0.362	-0.767896	0.276	-1.10784	0.745	0.877
ATF3	0.365	-0.657026	0.27	-0.947888	0.343	0.58
MCL1	0.367	-0.554862	0.266	-0.800497	0.422	0.679
EDNRA	0.368	-0.548259	0.264	-0.790971	0.402	0.642
RHOB	0.369	-0.781538	0.262	-1.12752	0.441	0.642
CCDC3	0.63	0.973221	0.26	1.40406	0.529	0.321
LY6E	0.374	-0.473049	0.252	-0.682465	0.294	0.519
RPL27A	0.376	-0.42458	0.248	-0.612539	0.304	0.531
GEM	0.377	-0.464053	0.246	-0.669486	0.402	0.654
HSPD1	0.377	-0.511894	0.246	-0.738507	0.373	0.605
ID3	0.377	-0.408037	0.246	-0.588673	0.608	0.84
DNAJA1	0.378	-0.69384	0.244	-1.001	0.52	0.679
FKBP4	0.379	-0.691518	0.242	-0.99765	0.186	0.407
BAG3	0.379	-1.03773	0.242	-1.49712	0.235	0.444
NR4A1	0.38	-0.598572	0.24	-0.863557	0.382	0.605
HSPA5	0.38	-0.552263	0.24	-0.796748	0.471	0.667
NGRN	0.381	-0.564473	0.238	-0.814363	0.216	0.432
IFITM2	0.618	0.439462	0.236	0.634009	0.706	0.642
HSPE1	0.382	-0.623008	0.236	-0.89881	0.265	0.481
CACYBP	0.383	-0.679779	0.234	-0.980714	0.167	0.383
RRAGA	0.385	-0.405939	0.23	-0.585646	0.225	0.457
ATP5IF1	0.385	-0.484206	0.23	-0.698562	0.225	0.457
UBL5	0.387	-0.539473	0.226	-0.778295	0.284	0.494
FOSB	0.388	-0.48143	0.224	-0.694557	0.382	0.617
ID1	0.388	-0.805197	0.224	-1.16165	0.265	0.457
SSR4	0.388	-0.500989	0.224	-0.722774	0.373	0.568
KLF9	0.611	0.600511	0.222	0.866354	0.441	0.247
IRF1	0.389	-0.87077	0.222	-1.25626	0.137	0.346
RPS4Y1	0.39	-0.628268	0.22	-0.906398	0.108	0.321
DUSP1	0.391	-0.479066	0.218	-0.691146	0.529	0.716
ZFAS1	0.393	-0.419269	0.214	-0.604877	0.225	0.432
RGS16	0.393	-0.771801	0.214	-1.11347	0.373	0.543
BST2	0.394	-0.443174	0.212	-0.639366	0.314	0.543
ANKRD37	0.394	-1.01198	0.212	-1.45998	0.098	0.309
TBX2	0.605	0.716789	0.21	1.03411	0.422	0.235
IER2	0.397	-0.413102	0.206	-0.59598	0.539	0.704
FAM162B	0.397	-0.581399	0.206	-0.838782	0.196	0.395
APEH	0.398	-0.437473	0.204	-0.63114	0.069	0.272
ADGRA2	0.601	0.773881	0.202	1.11647	0.343	0.173
TNFAIP3	0.399	-0.690393	0.202	-0.996026	0.098	0.296
HSPA6	0.399	-1.89914	0.202	-2.73988	0.069	0.259
UQCRB	0.4	-0.4456	0.2	-0.642865	0.314	0.481
AC020916.1	0.402	-0.755012	0.196	-1.08925	0.069	0.259
MAFF	0.404	-0.550579	0.192	-0.794318	0.108	0.296
FARP1	0.595	0.800897	0.19	1.15545	0.324	0.16
GHITM	0.405	-0.565066	0.19	-0.815217	0.235	0.42
SERPINH1	0.408	-0.432538	0.184	-0.624021	0.686	0.84
SHARPIN	0.409	-0.494041	0.182	-0.71275	0.098	0.272
HLA-F	0.41	-0.574405	0.18	-0.828691	0.216	0.37
SERTAD1	0.411	-0.425419	0.178	-0.613749	0.275	0.457
ICAM1	0.411	-1.11273	0.178	-1.60533	0.078	0.247
ACTN4	0.588	0.502445	0.176	0.724875	0.569	0.469
RBPMS	0.587	0.431843	0.174	0.623017	0.588	0.506
RBMX	0.414	-0.465983	0.172	-0.672271	0.176	0.346
TLN1	0.586	0.476623	0.172	0.687622	0.676	0.568
COX4I2	0.415	-0.418667	0.17	-0.604008	0.255	0.42
CHURC1	0.415	-0.406626	0.17	-0.586637	0.137	0.296
EHD2	0.585	0.530412	0.17	0.765223	0.627	0.568
COL3A1	0.585	0.415419	0.17	0.599323	0.765	0.728
IFI27	0.417	-0.522426	0.166	-0.753702	0.216	0.37
YWHAG	0.419	-0.481061	0.162	-0.694024	0.186	0.346
EDIL3	0.58	0.638894	0.16	0.921729	0.314	0.173
PSMD9	0.579	0.429114	0.158	0.619081	0.216	0.062
TMEM30A	0.578	0.658512	0.156	0.950032	0.333	0.21
CARMN	0.578	0.559342	0.156	0.80696	0.284	0.136
C1S	0.423	-0.413123	0.154	-0.59601	0.294	0.42
CXCL3	0.423	-0.803551	0.154	-1.15928	0.02	0.173
CLK1	0.423	-0.61261	0.154	-0.883809	0.098	0.247
ARGLU1	0.577	0.467093	0.154	0.673872	0.382	0.247
ITGA1	0.576	0.550944	0.152	0.794844	0.667	0.642
PTGIR	0.425	-0.429241	0.15	-0.619264	0.176	0.309
CNIH1	0.425	-0.442853	0.15	-0.638902	0.196	0.321
RPA3	0.425	-0.46605	0.15	-0.672369	0.039	0.185
TAF9	0.425	-0.410783	0.15	-0.592635	0.098	0.247
IKBIP	0.575	0.461158	0.15	0.66531	0.333	0.198
AURKAIP1	0.574	0.463671	0.148	0.668936	0.471	0.37
PIGT	0.427	-0.460151	0.146	-0.663857	0.186	0.321
LRP1	0.428	-0.405801	0.144	-0.585447	0.157	0.296
CDC42EP4	0.429	-0.594661	0.142	-0.857914	0.02	0.16
MRPL18	0.429	-0.554806	0.142	-0.800416	0.147	0.284
ABCF1	0.429	-0.447239	0.142	-0.645229	0.078	0.222
FAM114A1	0.571	0.615034	0.142	0.887307	0.382	0.284
KANK2	0.57	0.635433	0.14	0.916735	0.343	0.235
EGFL6	0.431	-0.632731	0.138	-0.912837	0.127	0.259
FBN1	0.569	0.499533	0.138	0.720674	0.275	0.148
ZC3H13	0.568	0.541867	0.136	0.781748	0.275	0.148
SESN3	0.433	-0.415943	0.134	-0.600079	0.078	0.21
RGL2	0.433	-0.443147	0.134	-0.639326	0.029	0.16
RND3	0.433	-0.4718	0.134	-0.680664	0.167	0.296
MAP1B	0.567	0.509344	0.134	0.734829	0.618	0.543
TDO2	0.434	-0.424542	0.132	-0.612485	0.029	0.16
LSM3	0.435	-0.466608	0.13	-0.673173	0.137	0.259
NID2	0.565	0.549361	0.13	0.79256	0.294	0.185
ZFAND3	0.565	0.451546	0.13	0.651443	0.196	0.074
C1QTNF2	0.436	-0.482434	0.128	-0.696005	0.098	0.222
TOMM40	0.564	0.55447	0.128	0.799932	0.216	0.099
FKBP3	0.563	0.541909	0.126	0.78181	0.235	0.123
ALCAM	0.562	0.450857	0.124	0.650449	0.206	0.086
CEP350	0.562	0.654443	0.124	0.944161	0.225	0.111
POSTN	0.438	-0.644301	0.124	-0.92953	0.078	0.198
PPP4R3A	0.561	0.409643	0.122	0.59099	0.157	0.037
C11orf96	0.561	0.527177	0.122	0.760555	0.52	0.469
GSTK1	0.56	0.419354	0.12	0.605	0.373	0.309
MEIS1	0.56	0.434331	0.12	0.626608	0.157	0.037
BBX	0.44	-0.512371	0.12	-0.739195	0.216	0.309
ENAH	0.559	0.66127	0.118	0.954011	0.284	0.198
CGAS	0.441	-0.48722	0.118	-0.70291	0.02	0.136
MDK	0.558	0.622959	0.116	0.898739	0.275	0.173
GOLGA2	0.558	0.590548	0.116	0.851981	0.275	0.185
KCNA5	0.442	-0.448842	0.116	-0.647542	0.069	0.185
ZFAND2A	0.442	-1.03651	0.116	-1.49537	0.098	0.198
MAZ	0.557	0.539449	0.114	0.778261	0.206	0.099
SASH1	0.557	0.616792	0.114	0.889842	0.235	0.136
MFAP2	0.557	0.442397	0.114	0.638244	0.176	0.062
ADAMDEC1	0.443	-1.18272	0.114	-1.7063	0.039	0.148
COL1A2	0.556	0.418028	0.112	0.603087	0.725	0.741
COL6A3	0.556	0.444025	0.112	0.640593	0.461	0.395
ADAMTS2	0.555	0.799128	0.11	1.1529	0.245	0.16
NRP2	0.555	0.491247	0.11	0.708719	0.167	0.062
EML4	0.555	0.467645	0.11	0.674669	0.245	0.148
NFATC2	0.445	-0.468286	0.11	-0.675595	0.049	0.16
CCL2	0.445	-1.07188	0.11	-1.54639	0.108	0.21
VCAM1	0.445	-0.445662	0.11	-0.642955	0.039	0.148
CCAR1	0.554	0.563453	0.108	0.81289	0.196	0.099
WASL	0.554	0.491658	0.108	0.709313	0.314	0.235
LPP	0.554	0.474281	0.108	0.684242	0.539	0.494
DAP3	0.554	0.451088	0.108	0.650783	0.216	0.111
PTPRK	0.553	0.558518	0.106	0.805771	0.324	0.247
PTPA	0.447	-0.430629	0.106	-0.621266	0.176	0.259
YY1	0.552	0.453088	0.104	0.653668	0.314	0.235
POR	0.552	0.474489	0.104	0.684542	0.196	0.099
HERPUD1	0.448	-0.447996	0.104	-0.646322	0.333	0.407
RBMS2	0.448	-0.426822	0.104	-0.615774	0.088	0.185
CYGB	0.551	0.527422	0.102	0.760909	0.255	0.16
NEAT1	0.551	0.409801	0.102	0.591218	0.578	0.543
SERPINB1	0.551	0.525046	0.102	0.757481	0.216	0.123
SLC12A2	0.551	0.589972	0.102	0.85115	0.137	0.037
CXCL2	0.449	-0.956469	0.102	-1.37989	0.078	0.173
SPPL2A	0.549	0.526327	0.098	0.759329	0.265	0.185
DYNC1H1	0.549	0.4244	0.098	0.61228	0.441	0.395
ASAP1	0.549	0.406701	0.098	0.586745	0.265	0.173
ANKRD17	0.549	0.448501	0.098	0.64705	0.157	0.062
TOMM70	0.549	0.498586	0.098	0.719308	0.157	0.062
ADAMTS9	0.549	0.499228	0.098	0.720234	0.225	0.136
CENPX	0.548	0.468443	0.096	0.67582	0.255	0.173
COTL1	0.548	0.446989	0.096	0.644869	0.245	0.16
HOOK3	0.548	0.460732	0.096	0.664696	0.314	0.247
SPATA20	0.452	-0.439157	0.096	-0.63357	0.059	0.148
HMGCS1	0.453	-0.468949	0.094	-0.676551	0.029	0.123
PCNP	0.546	0.444431	0.092	0.641179	0.304	0.235
NT5C	0.545	0.494228	0.09	0.71302	0.363	0.309
AGO2	0.545	0.567525	0.09	0.818766	0.196	0.123
SRSF10	0.545	0.48115	0.09	0.694153	0.304	0.235
TMEM106B	0.455	-0.457717	0.09	-0.660346	0.098	0.185
CDC37L1	0.543	0.436928	0.086	0.630353	0.167	0.086
TNPO1	0.543	0.452821	0.086	0.653282	0.157	0.074
ITGA8	0.457	-0.408288	0.086	-0.589034	0.108	0.185
S100A4	0.457	-0.407688	0.086	-0.588169	0.461	0.543
DNAJC1	0.542	0.43605	0.084	0.629088	0.304	0.235
TRAM1	0.542	0.408731	0.084	0.589674	0.275	0.21
ANKRD54	0.541	0.419262	0.082	0.604867	0.127	0.049
ST5	0.541	0.454764	0.082	0.656086	0.294	0.235
FAM122A	0.541	0.579683	0.082	0.836305	0.186	0.111
CCNL1	0.541	0.534647	0.082	0.771333	0.353	0.309
IGFBP2	0.541	0.490773	0.082	0.708036	0.275	0.21
ARHGAP15	0.459	-0.419334	0.082	-0.604971	0.235	0.309
JUND	0.54	0.450817	0.08	0.650392	0.265	0.21
CDK17	0.54	0.487913	0.08	0.70391	0.137	0.062
MAP3K2	0.54	0.505767	0.08	0.729668	0.147	0.074
TOMM20	0.54	0.421362	0.08	0.607896	0.353	0.296
PPP1R12C	0.539	0.500935	0.078	0.722697	0.137	0.062
TMEM11	0.539	0.406204	0.078	0.586029	0.186	0.123
HNRNPAB	0.539	0.498539	0.078	0.71924	0.343	0.296
MRPL47	0.461	-0.422537	0.078	-0.609592	0.127	0.198
ZSCAN18	0.538	0.48399	0.076	0.69825	0.176	0.111
ADAP2	0.538	0.424624	0.076	0.612604	0.392	0.333
TBL1XR1	0.538	0.412723	0.076	0.595433	0.137	0.062
ORAI3	0.537	0.432365	0.074	0.623771	0.167	0.099
CAMLG	0.537	0.430807	0.074	0.621524	0.284	0.235
EPSTI1	0.463	-0.456683	0.074	-0.658854	0.039	0.111
CD36	0.463	-0.42838	0.074	-0.618021	0.088	0.16
AKT2	0.536	0.414027	0.072	0.597315	0.108	0.037
PDE8A	0.536	0.47451	0.072	0.684573	0.118	0.049
BAZ2A	0.536	0.412372	0.072	0.594928	0.176	0.111
PTEN	0.536	0.64817	0.072	0.935111	0.216	0.16
CCDC50	0.536	0.662167	0.072	0.955305	0.284	0.247
LGALS3	0.535	0.566015	0.07	0.816588	0.412	0.383
HACD1	0.535	0.461217	0.07	0.665396	0.127	0.062
AKAP12	0.535	0.42836	0.07	0.617993	0.48	0.494
SLAIN2	0.535	0.462139	0.07	0.666726	0.127	0.062
HGSNAT	0.534	0.40707	0.068	0.587277	0.127	0.062
KLHDC8B	0.534	0.421118	0.068	0.607545	0.186	0.123
MTRNR2L8	0.466	-3.04971	0.068	-4.3998	0.118	0.185
NUTM2A-AS1	0.533	0.426717	0.066	0.615623	0.167	0.111
HDGF	0.533	0.416291	0.066	0.600581	0.167	0.111
CYP4X1	0.467	-0.536301	0.066	-0.773718	0.049	0.111
PURA	0.532	0.405579	0.064	0.585127	0.167	0.111
UBXN4	0.532	0.412612	0.064	0.595274	0.333	0.309
S100A10	0.532	0.490325	0.064	0.70739	0.245	0.198
DES	0.468	0.650544	0.064	0.938536	0.059	0.123
GSPT1	0.531	0.411366	0.062	0.593476	0.196	0.148
HACD3	0.531	0.446972	0.062	0.644844	0.216	0.173
TRIM44	0.531	0.45116	0.062	0.650887	0.216	0.16
DST	0.531	0.450737	0.062	0.650276	0.373	0.358
POLR1D	0.53	0.409866	0.06	0.591312	0.216	0.173
INHBA	0.529	0.583342	0.058	0.841585	0.137	0.086
AFF4	0.529	0.508429	0.058	0.733508	0.382	0.383
IFIT3	0.471	-0.565033	0.058	-0.815171	0.167	0.21
CDK4	0.528	0.411901	0.056	0.594247	0.225	0.185
RTL8A	0.527	0.448867	0.054	0.647579	0.363	0.346
PLK3	0.473	-0.606568	0.054	-0.875093	0.088	0.136
VPS26A	0.526	0.412749	0.052	0.595471	0.157	0.111
CTDSP1	0.525	0.431207	0.05	0.6221	0.196	0.16
ACBD3	0.525	0.415243	0.05	0.599069	0.108	0.062
TBC1D2B	0.523	0.448712	0.046	0.647355	0.137	0.099
NPTN	0.523	0.424622	0.046	0.612601	0.176	0.136
KRAS	0.523	0.408549	0.046	0.589412	0.245	0.222
TRIM27	0.523	0.431326	0.046	0.622271	0.147	0.111
FKBP5	0.522	0.466669	0.044	0.673261	0.255	0.222
DICER1	0.521	0.541816	0.042	0.781676	0.157	0.123
SLC4A2	0.519	0.412212	0.038	0.594696	0.108	0.074
ATP6V1C1	0.518	0.424358	0.036	0.61222	0.127	0.099
TMEM47	0.516	0.574291	0.032	0.828526	0.196	0.185
TNC	0.514	0.447614	0.028	0.64577	0.196	0.185
ODC1	0.513	0.511176	0.026	0.737471	0.127	0.111
TMX4	0.511	0.418294	0.022	0.603471	0.157	0.148
ECHDC1	0.507	0.465621	0.014	0.671748	0.127	0.123
REV3L	0.507	0.446746	0.014	0.644518	0.147	0.148
KRT8	0.505	0.476805	0.01	0.687885	0.147	0.148
S1PR3	0.505	0.507948	0.01	0.732814	0.304	0.346
NSD3	0.505	0.426702	0.01	0.615601	0.265	0.284
SRM	0.497	0.432872	0.006	0.624502	0.225	0.259
